# Supplementary material for: Characteristics and outcomes of patients with COVID-19 with and without prevalent hypertension: a multinational cohort study
Source: PubMed Central journal article supplement (PMC8704062; doi:10.1136/bmjopen-2021-057632), 2021-12-22
Supplement: bmjopen-2021-057632.draft_revisions.pdf [file bmjopen-2021-057632.draft_revisions.pdf]

# BMJ Open

BMJ Open is committed to open peer review. As part of this commitment we make the peer review history of every article we publish publicly available.

When an article is published we post the peer reviewers' comments and the authors' responses online. We also post the versions of the paper that were used during peer review. These are the versions that the peer review comments apply to.

The versions of the paper that follow are the versions that were submitted during the peer review process. They are not the versions of record or the final published versions. They should not be cited or distributed as the published version of this manuscript.

BMJ Open is an open access journal and the full, final, typeset and author-corrected version of record of the manuscript is available on our site with no access controls, subscription charges or pay-per-view fees (<http://bmjopen.bmj.com>).

If you have any questions on BMJ Open's open peer review process please email [info.bmjopen@bmj.com](mailto:info.bmjopen@bmj.com)

# BMJ Open

## Characteristics and outcomes of COVID-19 patients with and without prevalent hypertension: a multinational cohort study

|                               |                                                                                                                                                                                                                                                                                                                                                                                                                                                                                                                                                                                                                                                                                                                                                                                                                                                                                                                                                                                                                                                                                                                                                                                                                                                                                                                                                                                                                                                                                                                                                                                                                                                                                                                                                                                              |
|-------------------------------|----------------------------------------------------------------------------------------------------------------------------------------------------------------------------------------------------------------------------------------------------------------------------------------------------------------------------------------------------------------------------------------------------------------------------------------------------------------------------------------------------------------------------------------------------------------------------------------------------------------------------------------------------------------------------------------------------------------------------------------------------------------------------------------------------------------------------------------------------------------------------------------------------------------------------------------------------------------------------------------------------------------------------------------------------------------------------------------------------------------------------------------------------------------------------------------------------------------------------------------------------------------------------------------------------------------------------------------------------------------------------------------------------------------------------------------------------------------------------------------------------------------------------------------------------------------------------------------------------------------------------------------------------------------------------------------------------------------------------------------------------------------------------------------------|
| Journal:                      | <i>BMJ Open</i>                                                                                                                                                                                                                                                                                                                                                                                                                                                                                                                                                                                                                                                                                                                                                                                                                                                                                                                                                                                                                                                                                                                                                                                                                                                                                                                                                                                                                                                                                                                                                                                                                                                                                                                                                                              |
| Manuscript ID                 | bmjopen-2021-057632                                                                                                                                                                                                                                                                                                                                                                                                                                                                                                                                                                                                                                                                                                                                                                                                                                                                                                                                                                                                                                                                                                                                                                                                                                                                                                                                                                                                                                                                                                                                                                                                                                                                                                                                                                          |
| Article Type:                 | Original research                                                                                                                                                                                                                                                                                                                                                                                                                                                                                                                                                                                                                                                                                                                                                                                                                                                                                                                                                                                                                                                                                                                                                                                                                                                                                                                                                                                                                                                                                                                                                                                                                                                                                                                                                                            |
| Date Submitted by the Author: | 29-Sep-2021                                                                                                                                                                                                                                                                                                                                                                                                                                                                                                                                                                                                                                                                                                                                                                                                                                                                                                                                                                                                                                                                                                                                                                                                                                                                                                                                                                                                                                                                                                                                                                                                                                                                                                                                                                                  |
| Complete List of Authors:     | <p>Reyes, Carlen; GREMPAL Research Group, Fundació Institut Universitari per a la recerca a l'Atenció Primària de Salut Jordi Gol i Gurina (IDIAPJGol), and CIBERFes, Universitat Autònoma de Barcelona and Instituto de Salud Carlos III,</p> <p>Pistillo, Andrea ; Fundació Institut Universitari per a la recerca a l'Atenció Primària de Salut Jordi Gol i Gurina (IDIAPJGol),</p> <p>Fernández-Bertolín, Sergio; Fundació Institut Universitari per a la recerca a l'Atenció Primària de Salut Jordi Gol i Gurina (IDIAPJGol),</p> <p>Recalde, Martina</p> <p>Roel, Elena</p> <p>Puente, Diana; IDIAP Jordi Gol, Research</p> <p>Sena, Anthony</p> <p>Blacketer, Clair</p> <p>Lai, Lana</p> <p>Alshammari, Thamir; King Saud University, Medication Safety Research Chair; Saudi Food and Drug Authority,</p> <p>Ahmed, Waheed-UI-Rahman</p> <p>Alser, Osaid ; Harvard Medical School, Trauma, Emergency Surgery and Surgical Critical Care</p> <p>Alghoul, Heba; Islamic University of Gaza Faculty of Medicine,</p> <p>Areia, Carlos; University of Oxford, Nuffield Department of Clinical Neurosciences</p> <p>Dawoud, Dalia; National Institute for Health and Care Excellence,</p> <p>Prats-Urbe, Albert; University of Oxford, Nuffield Department of Orthopaedics Rheumatology and Musculoskeletal Science</p> <p>Valveny, Neus</p> <p>de Maeztu, Gabriel</p> <p>Sorlí Redó, Luisa</p> <p>Martinez Roldan, Jordi</p> <p>Lopez Montesinos, Inmaculada</p> <p>Schilling, Lisa</p> <p>Golozar, Asieh; Johns Hopkins University Bloomberg School of Public Health</p> <p>Reich, Christian</p> <p>Posada, Jose</p> <p>Shah, Nigam ; Stanford University,</p> <p>You, Sen Chang</p> <p>Lynch, Kristine; Department of Veterans Affairs; The University of Utah School of Medicine</p> |

1  
2  
3  
4  
5  
6  
7  
8  
9  
10  
11  
12  
13  
14  
15  
16  
17  
18  
19  
20  
21  
22  
23  
24  
25  
26  
27  
28  
29  
30  
31  
32  
33  
34  
35  
36  
37  
38  
39  
40  
41  
42  
43  
44  
45  
46  
47  
48  
49  
50  
51  
52  
53  
54  
55  
56  
57  
58  
59  
60

|           |                                                                                                                                                                                                                                                                                                                                                                                                                                                                                                                                                                                                                                                                                                                                                                                                                                                              |
|-----------|--------------------------------------------------------------------------------------------------------------------------------------------------------------------------------------------------------------------------------------------------------------------------------------------------------------------------------------------------------------------------------------------------------------------------------------------------------------------------------------------------------------------------------------------------------------------------------------------------------------------------------------------------------------------------------------------------------------------------------------------------------------------------------------------------------------------------------------------------------------|
|           | <p>DuVall, Scott; Department of Veterans Affairs; The University of Utah School of Medicine<br/> Matheny, Michael; VA Tennessee Valley Healthcare System, GRECC; Vanderbilt University Medical Center, Department of Biomedical Informatics<br/> Nyberg, Fredrik; University of Gothenburg Sahlgrenska Academy, School of Public Health and Community Medicine, Institute of Medicine, Institute of Medicine<br/> Ostropolets, Anna<br/> Hripcsak, George<br/> Rijnbeek, P; Erasmus Medical Center, Rotterdam<br/> Suchard, MA; University of California Los Angeles,<br/> Ryan, Patrick; Janssen Research and Development LLC, Observational Health Data Analytics; Columbia University Irving Medical Center, Department of Biomedical Informatics<br/> Kostka, Kristin<br/> Duarte-Salles, Talita; Institut de Recerca en Atencio Primaria Jordi Gol,</p> |
| Keywords: | COVID-19, EPIDEMIOLOGY, Hypertension < CARDIOLOGY                                                                                                                                                                                                                                                                                                                                                                                                                                                                                                                                                                                                                                                                                                                                                                                                            |
|           |                                                                                                                                                                                                                                                                                                                                                                                                                                                                                                                                                                                                                                                                                                                                                                                                                                                              |

SCHOLARONE™  
Manuscripts

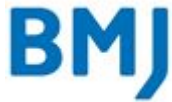

I, the Submitting Author has the right to grant and does grant on behalf of all authors of the Work (as defined in the below author licence), an exclusive licence and/or a non-exclusive licence for contributions from authors who are: i) UK Crown employees; ii) where BMJ has agreed a CC-BY licence shall apply, and/or iii) in accordance with the terms applicable for US Federal Government officers or employees acting as part of their official duties; on a worldwide, perpetual, irrevocable, royalty-free basis to BMJ Publishing Group Ltd ("BMJ") its licensees and where the relevant Journal is co-owned by BMJ to the co-owners of the Journal, to publish the Work in this journal and any other BMJ products and to exploit all rights, as set out in our [licence](#).

The Submitting Author accepts and understands that any supply made under these terms is made by BMJ to the Submitting Author unless you are acting as an employee on behalf of your employer or a postgraduate student of an affiliated institution which is paying any applicable article publishing charge ("APC") for Open Access articles. Where the Submitting Author wishes to make the Work available on an Open Access basis (and intends to pay the relevant APC), the terms of reuse of such Open Access shall be governed by a Creative Commons licence – details of these licences and which [Creative Commons](#) licence will apply to this Work are set out in our licence referred to above.

Other than as permitted in any relevant BMJ Author's Self Archiving Policies, I confirm this Work has not been accepted for publication elsewhere, is not being considered for publication elsewhere and does not duplicate material already published. I confirm all authors consent to publication of this Work and authorise the granting of this licence.

1  
2  
3 1 Characteristics and outcomes of COVID-19 patients with and without prevalent  
4  
5 2 hypertension: a multinational cohort study  
6  
7 3  
8  
9

10 4 Carlen Reyes<sup>1</sup>, Andrea Pistillo<sup>1</sup>, Sergio Fernandez Bertolin<sup>1</sup>, Martina Recalde<sup>1,2</sup>, Elena  
11  
12 5 Roel<sup>1,2</sup>, Diana Puente<sup>1,2</sup>, Anthony G. Sena<sup>3,4</sup>, Claire Blacketer<sup>3,4</sup>, Lana YH Lai<sup>5</sup>, Thamer M  
13  
14 6 Alshammari<sup>6</sup>, Waheed-UI-Rahman Ahmed<sup>7,8</sup>, Osaid Alser<sup>9</sup>, Heba Alghoul<sup>10</sup>, Carlos Areia<sup>11</sup>,  
15  
16 7 Dalia Dawoud<sup>12,13</sup>, Albert Prats-Urbe<sup>14</sup>, Neus Valveny<sup>15</sup>, Gabriel de Maeztu<sup>16</sup>, Luisa Sorlí  
17  
18 8 Redó<sup>2,17,18</sup>, Jordi Martínez Roldán<sup>19</sup>, Inmaculada Lopez Montesinos<sup>17</sup>, Lisa M Schilling<sup>20</sup>,  
19  
20 9 Asieh Golozar<sup>21,22</sup>, Christian Reich<sup>23</sup>, Jose D. Posada<sup>24</sup>, Nigam H. Shah<sup>24</sup>, Seng Chan You<sup>25</sup>,  
21  
22 10 Kristine E. Lynch<sup>26,27</sup>, Scott L. DuVall<sup>26,27</sup>, Michael Matheny<sup>26,27</sup>, Fredrik Nyberg<sup>28</sup>, Anna  
23  
24 11 Ostropolets<sup>29</sup>, George Hripcsak<sup>30,31</sup>, Peter Rijnbeek<sup>32</sup>, Mark A. Suchard<sup>33</sup>, Patrick Ryan<sup>3,30</sup>,  
25  
26 12 Kristin Kostka<sup>23,34</sup>, Talita Duarte-Salles<sup>1\*</sup>  
27  
28  
29  
30  
31  
32

33 14 Affiliations:

- 34  
35 15 1- Fundació Institut Universitari per a la recerca a l'Atenció Primària de Salut Jordi Gol i  
36  
37 Gurina (IDIAPJGol), Barcelona, Spain.  
38  
39 16  
40 17 2- Universitat Autònoma de Barcelona, Spain  
41  
42  
43 18 3- Janssen Research & Development, Titusville, NJ, USA  
44  
45  
46 19 4- Department of Medical Informatics, Erasmus University Medical Center, Rotterdam, The  
47  
48 Netherlands  
49  
50 20  
51 21 5- School of Medical Sciences, University of Manchester, UK  
52  
53  
54 22 6- College of Pharmacy, Riyadh Elm University Riyadh, Saudi  
55  
56  
57 23 7- Nuffield Department of Orthopaedics, Rheumatology, and Musculoskeletal Sciences,  
58  
59 University of Oxford, Botnar Research Centre, Windmill Road, Oxford, UK.  
60

- 1
- 2
- 3 25 8- College of Medicine and Health, University of Exeter, St Luke's Campus, Heavitree
- 4
- 5 26 Road, Exeter, UK
- 6
- 7
- 8 27 9- Massachusetts General Hospital, Harvard Medical School, USA
- 9
- 10 28 10- Faculty of Medicine, Islamic University of Gaza, Palestine
- 11
- 12 29 11- Nuffield Department of Clinical Neurosciences, University of Oxford, Oxford, UK
- 13
- 14 30 12- National Institute for Health and Care Excellence (NICE), London, UK
- 15
- 16 31 13- Cairo University, Faculty of Pharmacy, Cairo, Egypt
- 17
- 18 32 14- Centre for Statistics in Medicine, NDORMS, University of Oxford, Botnar Research
- 19 33 Centre, Nuffield Orthopaedic Centre, Windmill Road, Oxford, UK
- 20
- 21
- 22 34 15- Real-World Evidence, TFS, Barcelona, Spain
- 23
- 24 35 16- IOMED, Barcelona, Spain
- 25
- 26 36 17- Department of Infectious Diseases, Hospital del Mar, Institut Hospital del Mar
- 27 37 d'Investigació Mèdica (IMIM), Barcelona, Spain
- 28
- 29 38 18- Universitat Pompeu Fabra, Barcelona, Spain
- 30
- 31 39 19- Director of Innovation and Digital Transformation, Hospital del Mar, Barcelona, Spain
- 32
- 33 40 20- University of Colorado Anschutz Medical Campus, Aurora, CO, USA
- 34
- 35 41 21- Regeneron Pharmaceuticals, Tarrytown, NY, USA
- 36
- 37 42 22- Johns Hopkins Bloomberg School of Public health, NY, USA
- 38
- 39 43 23- Real-World Solutions, IQVIA, Cambridge, MA, USA
- 40
- 41 44 24- Stanford University School of Medicine, Stanford, CA, USA
- 42
- 43 45 25- Department of Preventive Medicine, Yonsei University College of Medicine, Seoul,
- 44 46 Korea
- 45
- 46 47 26- VA Informatics and Computing Infrastructure, VA Salt Lake City Health Care System,
- 47 48 Salt Lake City, UT, USA
- 48
- 49
- 50
- 51
- 52
- 53
- 54
- 55
- 56
- 57
- 58
- 59
- 60

- 1  
2  
3 49 27- Department of Internal Medicine, University of Utah School of Medicine, Salt Lake City,  
4  
5 50 UT, USA  
6  
7  
8 51 28- School of Public Health and Community Medicine, Institute of Medicine, Sahlgrenska  
9  
10 52 Academy, University of Gothenburg, Gothenburg, Sweden  
11  
12 53 29- Columbia University Irving Medical Center, New York, USA  
13  
14 54 30- Department of Biomedical Informatics, Columbia University Irving Medical Center, New  
15  
16 55 York, NY, USA  
17  
18 56 31- Medical Informatics Services, NewYork-Presbyterian Hospital, New York, NY, USA  
19  
20 57 32- Department of Medical Informatics Erasmus University Medical Center, Rotterdam, The  
21  
22 58 Netherlands  
23  
24 59 33- Department of Biostatistics, Fielding School of Public Health, University of California,  
25  
26 60 Los Angeles, USA  
27  
28 61 34- The OHDSI Center at the Roux Institute, Northeastern University, Portland, ME, USA  
29  
30  
31  
32  
33  
34

35 63 \*Corresponding author:

36  
37 64 Talita Duarte-Salles

38  
39 65 Fundació Institut Universitari per la recerca a L'Atenció Primària de Salut Jordi Gol I Gurina

40  
41 66 (IDIAPJGol)

42  
43 67 Gran Via Corts Catalanes, 587, àtic

44  
45 68 08007 Barcelona-Spain

46  
47 69 Tel: +34-93 4824342

48  
49 70 Email: tduarte@idiapjgol.org

50  
51 71

52  
53 72

54  
55 73

1  
2  
3 74 **ABSTRACT**  
4

5 75 **Objective:** To characterize patients with and without prevalent hypertension and COVID-19,  
6  
7  
8 76 and to assess their adverse outcomes in both in and outpatients.  
9

10 77 **Design and setting:** Retrospective cohort study using 15 healthcare databases (primary and  
11  
12 78 secondary electronic health care records, insurance and national claims data) from the US,  
13  
14  
15 79 Europe and South Korea, standardized to the Observation Medical Outcomes Partnership  
16  
17 80 common data model.  
18

19  
20 81 **Participants:** We included all patients diagnosed/hospitalized with COVID-19 (non-  
21  
22 82 mutually exclusive cohorts) and stratified them by hypertension status. Follow-up was from  
23  
24 83 COVID-19 diagnosis/hospitalization to death, end of the study period, or 30-days.  
25

26  
27 84 **Outcomes:** Demographics, comorbidities, and 30-day outcomes (hospitalization, adverse  
28  
29 85 events or death) were reported.  
30

31  
32 86 **Results:** We identified 2,851,035 diagnosed and 563,708 hospitalized patients with COVID-  
33  
34 87 19. Hypertension was more prevalent in the latter (range (%), 95%CI) across databases 17.4  
35  
36 88 (17.2-17.6)- 61.4 (61.0-61.8) and 25.6 (24.6-26.6)-85.9 (85.2-86.6). Patients with  
37  
38 89 hypertension diagnosed with COVID-19 were predominantly >50-year-old and female.  
39  
40 90 Patients with hypertension were frequently diagnosed with obesity, heart disease,  
41  
42 91 dyslipidaemia, and diabetes. Compared to patients without hypertension, patients with  
43  
44 92 hypertension had more hospitalizations (range 1.3 (0.4-2.2)- 41.1 (39.5-42.7) vs 1.4 (0.9-1.9)-  
45  
46 93 15.9 (14.9-16.9)) and mortality (0.3(0.1-0.5)-18.5 (15.7-21.3) vs 0.2 (0.2-0.2)-11.8 (10.8-  
47  
48 94 12.8)). Hospitalized patients with hypertension were more likely to have acute respiratory  
49  
50 95 distress syndrome (0.1(0.0-0.2) -65.6 (62.5-68.7) vs 0.1 (0.0-0.2)-54.7 (50.5-58.9)),  
51  
52 96 arrhythmia (0.5 (0.3-0.7)-45.8 (42.6-49.0) vs 0.4 (0.3-0.5)-36.8 (32.7-40.9)) and increased  
53  
54  
55  
56  
57  
58  
59  
60



1  
2  
3 97 mortality (1.8 (0.4-3.2)-25.1 (23.0-27.2) vs 0.7 (0.5-0.9)-10.9 (10.4-11.4)) than patients  
4  
5  
6 98 without hypertension.

7  
8 99 **Conclusions:** COVID-19 patients with hypertension were more likely to suffer severe  
9  
10  
11 100 outcomes, hospitalizations and deaths compared to those without hypertension.

12  
13 101 **KEY WORDS:** COVID-19, Epidemiology, Hypertension

14  
15  
16 102 **WORD COUNT:** 2,971

17  
18 103 **ARTICLE SUMMARY**

19  
20 104 **Strengths and limitations of this study**

21  
22  
23 105 1- This study is unique in its approach to characterizing COVID-19 cases across an  
24  
25 106 international network of healthcare databases, with diverse healthcare systems and  
26  
27 107 policies, through a comprehensive federated approach.

28  
29  
30 108 2- This study was carried out using routinely collected clinical practice data, which  
31  
32 109 confers a great external validity, but also implies a risk of misclassification.

33  
34 110 3- This study was intentionally descriptive and was deliberately not designed for causal  
35  
36 111 inference.

37  
38  
39 112 4- The diagnosed and/or hospitalized cohorts were non-mutually exclusive.

40  
41 113 5- The data that underpinned this study mostly came from the initial months of the  
42  
43 114 COVID-19 pandemic and may not be representative of the COVID-19 cases  
44  
45 115 diagnosed and/or hospitalized during subsequent periods.

46  
47  
48 116 **FUNDING STATEMENT**

49  
50 117 This work was supported by several funders as follows; The European Health Data &  
51  
52 118 Evidence Network received funding from the Innovative Medicines Initiative 2 Joint  
53  
54  
55 119 Undertaking (JU) under grant agreement No 806968. The JU received support from the  
56  
57 120 European Union's Horizon 2020 research and innovation programme and EFPIA. This  
58  
59 121 research received partial support from the National Institute for Health Research (NIHR)

1  
2  
3 122 Oxford Biomedical Research Centre (BRC), US National Institutes of Health (R01  
4  
5 123 LM006910), US Department of Veterans Affairs, the Health Department from the Generalitat  
6  
7 124 de Catalunya with a grant for research projects on SARS-CoV-2 and COVID-19 disease  
8  
9 125 organized by the Direcció General de Recerca i Innovació en Salut, Janssen Research &  
10  
11 126 Development, TFS, IOMED and IQVIA. The University of Oxford received funding related  
12  
13 127 to this work from the Bill & Melinda Gates Foundation (Investment ID INV-016201 and  
14  
15 128 INV-019257). TFS received funding related to this work from the University of Oxford. This  
16  
17 129 work was also supported with funding, [resources, and facilities] of the Department of  
18  
19 130 Veterans Affairs (VA) Informatics and Computing Infrastructure (VINCI), VA HSR RES 13-  
20  
21 131 457. No funders had a direct role in this study. The views and opinions expressed are those of  
22  
23 132 the authors and do not necessarily reflect those of the Clinician Scientist Award programme,  
24  
25 133 NIHR, Department of Veterans Affairs or the United States Government, NHS, or the  
26  
27 134 Department of Health, England.

### 135 **COMPETING INTERESTS STATEMENT**

136 SLDV reports grants from Anolinx; MS, reports grants from US National Institutes of Health,  
137 grants from Department of Veterans Affairs, during the conduct of the study; grants from  
138 IQVIA, personal fees from Janssen Research and Development, grants from US Food and  
139 Drug Administration, personal fees from Private Health Management, outside the submitted  
140 work LLC, grants from Astellas Pharma, Inc, grants from AstraZeneca Pharmaceuticals LP,  
141 grants from Boehringer Ingelheim International GmbH, grants from Celgene Corporation,  
142 grants from Eli Lilly and Company, grants from Genentech Inc., grants from Genomic  
143 Health, Inc., grants from Gilead Sciences Inc., grants from GlaxoSmithKline PLC, grants  
144 from Innocrin Pharmaceuticals Inc., grants from Janssen Pharmaceuticals, Inc., grants from  
145 Kantar Health, grants from Myriad Genetic Laboratories, Inc., grants from Novartis  
146 International AG, grants from Parexel International Corporation through the University of

1  
2  
3 147 Utah or Western Institute for Veteran Research, outside the submitted work; GH, reports  
4  
5 148 grants from NIH, during the conduct of the study; grants from Janssen Research, outside the  
6  
7 149 submitted work; FN, reports that Until 2019 was an employee of AstraZeneca and holds  
8  
9 150 some AstraZeneca shares, outside the submitted work; KK, reports personal fees from  
10  
11 151 National Institutes of Health, outside the submitted work, and at the time of data analysis and  
12  
13 152 initial drafting of the manuscript, KK was an employee of IQVIA Inc; CR reports he is an  
14  
15 153 employee of IQVIA Inc; GdM is Employee of IOMED; NV is an Employee of TFS; AGS  
16  
17 154 reports personal fees from Janssen R&D, outside the submitted work and full time employee  
18  
19 155 of Janssen R&D and is a Johnson and Johnson shareholder; CB reports personal fees from  
20  
21 156 Janssen R&D, outside the submitted work and is a full time employee of Janssen R&D and is  
22  
23 157 a Johnson and Johnson shareholder; JDP reports grants from National Library of Medicine,  
24  
25 158 during the conduct of the study; AG is an employee of Regeneron Pharmaceuticals and  
26  
27 159 reports stocks from Regeneron Pharmaceuticals. PR reports having received research group  
28  
29 160 grants from Innovative Medicine Initiative and Janssen Research and Development; MS  
30  
31 161 reports grants from US National Institutes of Health, grants from Department of Veterans  
32  
33 162 Affairs, during the conduct of the study; grants from IQVIA, personal fees from Janssen  
34  
35 163 Research and Development, grants from US Food and Drug Administration, personal fees  
36  
37 164 from Private Health Management, outside the submitted work; PR, reports and is an  
38  
39 165 employee of Janssen Research and Development and shareholder of Johnson & Johnson; ER,  
40  
41 166 SFB, NHS, LMS, DP, SCY, MR, APU, HA, KEL, MM, AO, CA, CR, TDS, TMA, OA, W-  
42  
43 167 U-RA, ILM, JMR, LSR, DD, LYHL, AP, have nothing to declare. The views expressed are  
44  
45 168 those of the authors and do not necessarily represent the views or policy of the Department of  
46  
47 169 Veterans Affairs or the United States Government. No other relationships or activities could  
48  
49 170 appear to have influenced the submitted work.  
50  
51  
52  
53  
54  
55  
56  
57  
58  
59  
60

## 172 INTRODUCTION

173 As of September 2021, the ongoing pandemic of the coronavirus disease 2019 (COVID-19)  
174 has affected over 220 million people and the estimated death toll surpasses the 4,5 million  
175 deaths worldwide<sup>1</sup>. Hypertension is a common chronic condition that may increase the risk of  
176 hospitalizations and adverse outcomes<sup>2</sup>. A higher prevalence of hypertension has been found  
177 among COVID-19 patients compared to the general population, which has attracted the  
178 attention of researchers<sup>3</sup>. The characterization of this population at risk is key to be able to  
179 design effective preventive strategies that could, improve patient outcomes and reduce the  
180 pressure on healthcare systems.

181 To date, observational studies<sup>4-16</sup>, systematic reviews, and meta-analyses have reported an  
182 increased risk of progression to severe COVID-19 and increased mortality in patients with  
183 hypertension<sup>17-21</sup>. However, these studies, either only included hospitalized patients<sup>4-13,15-16</sup>,  
184 leading to a selection bias, or had a small sample size<sup>6-10,15</sup>, both of which limits the  
185 extrapolation of results.

186 Most patients with confirmed SARS-CoV-2 infection, experience mild or moderate  
187 symptoms (80%)<sup>22</sup> and are predominantly seen as outpatients, therefore a large  
188 characterization study including both inpatient and outpatients is needed.

189 This study aims to describe and compare the demographics, baseline comorbidities and 30-  
190 day outcomes of individuals with COVID-19 and with and without pre-existing hypertension,  
191 in both in and outpatients.

192

## 193 MATERIAL AND METHODS

### 194 Study design, setting, and data sources

1  
2  
3 195 A multinational, multi-data base cohort study was conducted using data from 1<sup>st</sup> March to the  
4  
5 196 31<sup>st</sup> October 2020 included in “The Characterizing Health Associated Risks and Your  
6  
7 197 Baseline Disease In SARS-COV-2” (CHARYBDIS <sup>23</sup>) study. This is a large-scale  
8  
9  
10 198 multinational cohort study aimed to characterize health-associated risks and baseline diseases  
11  
12 199 in SARS-COV-2 patients using routinely collected primary care and hospital electronic  
13  
14 200 health records (EHR), hospital billing, and insurance claims data from the United States  
15  
16 201 (US), Europe (the Netherlands, Spain, the United Kingdom (UK), Germany, and France) and  
17  
18 202 Asia (South Korea and China).

19  
20  
21  
22 203 From the databases contributing to CHARYBDIS, only twenty had available information on  
23  
24 204 pre-existing hypertension and were initially selected. To be included in the study, databases  
25  
26 205 had to: 1. have at least 140 subjects with prevalent hypertension diagnosed with COVID-19  
27  
28 206 (necessary to estimate the prevalence of previous conditions or 30-day outcomes with  
29  
30 207 sufficient precision (confidence interval width of  $\pm 5\%$ ) and 2. have at least one year of  
31  
32  
33 208 previous data before the date of COVID-19 diagnosis or hospitalization. Data results for this  
34  
35 209 paper were extracted on the 21<sup>st</sup> of January 2021 <sup>23</sup>. Fifteen databases complied with the  
36  
37 210 aforementioned inclusion criteria. Of these, five had data for outpatients (IQVIA-  
38  
39 211 Longitudinal Patients Database “LPD” (France), IQVIA-Longitudinal Patients Database  
40  
41 212 “LPD” (Italy), IQVIA-Disease Analyser “DA” (Germany), Clinical Practice Research  
42  
43 213 Datalink “CPRD” (UK), Integrated Primary Care Information “IPCI” (the Netherlands), two  
44  
45 214 had data for in-patients (Health Insurance Review & Assessment Service “HIRA” (South  
46  
47 215 Korea), Hospital del Mar “HMAR” (Spain)) and eight had both in and out-patient data  
48  
49 216 (IQVIA-OpenClaims, HEALTHVERITY, Information System for Research in Primary Care  
50  
51 217 “SIDIAP” (Spain <sup>24</sup>), Optum© de-identified Electronic health Record Dataset “OPTUM-  
52  
53 218 HER” (US), VA-OMOP, University of Colorado Anschutz Medical Campus Health Data  
54  
55  
56  
57  
58  
59  
60

1  
2  
3 219 Compass “CUIMC” (US), CU-AMC-HDC, STANford Medicine Research Data Repository  
4  
5 220 “STARR-OMOP” (US<sup>25</sup>). A more detailed description of the included data sources is  
6  
7  
8 221 available in the Supporting Figure 1 and Table 1.

### 9 10 222 **Study participants and follow-up**

11  
12 223 Two non-mutually exclusive cohorts were defined: 1) individuals *diagnosed* with COVID-19  
13  
14 224 (COVID-19 *diagnosed*) and 2) individuals *hospitalized* with COVID-19 (COVID-19  
15  
16 225 *hospitalized*). COVID-19 *diagnosed* cohort included individuals with a COVID-19 clinical  
17  
18 226 diagnosis and/or a SARS-CoV-2 positive test. The COVID-19 *hospitalized* cohort included  
19  
20 227 patients hospitalized with a COVID-19 clinical diagnosis or positive test 21 days before  
21  
22 228 admission up to the end of their hospitalization. The codes used to identify COVID-19 cases  
23  
24 229 are described in more detail in Supporting Table 2. The index date (i.e. cohort start date) was  
25  
26 230 the date of COVID-19 diagnosis or positive test (whichever occurred first), for the diagnosed  
27  
28 231 cohort; and the date of hospitalization, for the hospitalized cohort. Cohort participants were  
29  
30 232 followed from the index date to the earliest of death, the end of the observation period, or 30  
31  
32 233 days after.

### 33 34 35 36 37 234 **Baseline characteristics and outcomes of interest**

38  
39 235 The hypertension diagnosis, as well as the participants’ sex and age, were gathered at the  
40  
41 236 index date and identified comorbidities in the year before the index date. Comorbidities  
42  
43 237 (asthma, cancer, chronic kidney and liver disease, chronic obstructive pulmonary disease,  
44  
45 238 dementia, heart disease, hyperlipidaemia, peripheral vascular disease, type 2 diabetes  
46  
47 239 mellitus, obesity) were ascertained based on the Systematized Nomenclature of Medicine  
48  
49 240 Current Terminology (SNOMED CT) hierarchy, with all descendant codes included. We  
50  
51 241 selected and included comorbidities based on their prevalence in the cohorts of the  
52  
53 242 participating sites and their clinical relevance to the COVID-19 research field<sup>17-21</sup>. Clinical  
54  
55 243 epidemiologists generated a list of codes for the identification of prior medical conditions and  
56  
57  
58  
59  
60

1  
2  
3 244 outcomes of interest using a web-based integrated platform (ATLAS tool:  
4  
5 245 <https://atlas.ohdsi.org/>). The definition of the variables can be found in Supporting Table 3.  
6  
7  
8 246 Our main 30-day outcomes of interest were hospitalization and death for the COVID-19  
9  
10 247 *diagnosed* cohort, and requirement of intensive services (identified as any record of  
11  
12 248 mechanical ventilation and/or a tracheostomy and/or extracorporeal membrane oxygenation  
13  
14 249 procedure), acute respiratory distress syndrome (ARDS), arrhythmia, total cardiovascular  
15  
16 250 events (ischemic stroke, haemorrhagic stroke, heart failure (heart failure during  
17  
18 251 hospitalization for the hospitalized cohort), acute myocardial infarction or sudden cardiac  
19  
20 252 death), sepsis, bleeding, venous thromboembolism (VTE) and death for the COVID-19  
21  
22 253 *hospitalized* cohort.

#### 26 254 **Statistical analyses**

28 255 All data were standardized to the Observational Medical Outcomes Partnership (OMOP)  
29  
30 256 Common Data Model (CDM) <sup>26</sup>. A common analytical code for the CHARYBDIS study was  
31  
32 257 developed for the Observational Health Data Sciences and Informatics (OHDSI) Methods  
33  
34 258 Library which was run locally in each database. Only aggregate results from each database  
35  
36 259 were publicly shared. The CHARYBDIS protocol and source code can be found at  
37  
38 260 <https://github.com/ohdsi-studies/Covid19CharacterizationCharybdis>.  
39  
40  
41 261 Demographics (sex and age categorized in 5-year age bands), comorbidities and 30-day  
42  
43 262 incidence rates of outcomes were reported as proportions, along with 95% Confidence  
44  
45 263 Intervals (CI). A minimum of 5 individuals was established to minimize the risk of  
46  
47 264 identification of patients.  
48  
49  
50  
51 265 All results are reported by cohort, database and by hypertension status (with or without  
52  
53 266 hypertension).  
54  
55  
56 267 This is a descriptive study and no causal inference is intended. Multivariable regression or  
57  
58 268 adjustment for confounding was therefore considered out of remit, and not included in our  
59  
60

1  
2  
3 269 study. We used R version 4.0.3 for data visualization. Before performing these analyses, all  
4  
5 270 the data partners obtained Institutional Review Board (IRB) or equivalent governance  
6  
7 271 approval. All data partners consented to the external sharing of the result set on  
8  
9  
10 272 data.ohdsi.org. Consent to participate was not required as only anonymised retrospective data  
11  
12 273 was used for this study and no patient or GP contact was required.

#### 14 274 **Patient and Public Involvement**

16  
17 275 No patient involved

### 19 276 **RESULTS**

#### 21 277 **Study population**

23  
24 278 Overall, 2,851,035 patients diagnosed and 563,708 patients hospitalized with COVID-19  
25  
26 279 were identified in 15 databases from 8 countries (the US, South Korea, Germany, the  
27  
28 280 Netherlands, France, Italy, Spain, and the UK). In total, 1,408,762 and 427,385 patients  
29  
30 281 diagnosed and hospitalized with COVID-19, respectively, had a prior diagnosis of  
31  
32 282 hypertension (Supporting Table 4). The prevalence of hypertension ranged from 17.4% to  
33  
34 283 48.3% in the COVID-19 *diagnosed* cohort, and from 25.6% to 85.9% in the COVID-19  
35  
36 284 *hospitalized cohort*.

#### 39 285 **Baseline characteristics**

41  
42 286 The age and sex distribution in the COVID-19 *diagnosed cohort* and in the COVID-19  
43  
44 287 *hospitalized cohort*, with and without hypertension are represented in Figures 1 and 2  
45  
46 288 respectively. Overall, in both cohorts, patients with hypertension were older than those  
47  
48 289 without (higher proportion of patients aged above 50 across all databases). The proportion of  
49  
50 290 patients *diagnosed* with COVID-19 and hypertension peaked at a younger age (55 to 70 years  
51  
52 291 old) compared to those *hospitalized* (70 to 80 years old). The proportion of women with  
53  
54 292 hypertension was greater in the *diagnosed* cohort (8.6 % to 55.6%) than in the *hospitalized*  
55  
56 293 cohort (4.5% to 56%).  
57  
58  
59  
60



1  
2  
3 **294 Baseline comorbidities**

4  
5 **295** Figures 3 and 4 reports the proportion of baseline comorbidities of the COVID-19 *diagnosed*  
6  
7  
8 **296** cohort (Figure 3) and COVID-19 *hospitalized* cohort (Figure 4), with and without  
9  
10 **297** hypertension. Patients with hypertension and COVID-19 *diagnosed* or *hospitalized* were  
11  
12 **298** frequently diagnosed with obesity, heart disease, dyslipidaemia, and type 2 diabetes, the  
13  
14 **299** proportion of which, more than double the ones found among patients with COVID-19  
15  
16  
17 **300** without hypertension.

18  
19 **301 30-day outcomes of interest**

20  
21 **302** Thirty-day outcomes in people with and without hypertension in both the COVID-19  
22  
23 **303** *diagnosed* and/or *hospitalized* cohorts are reported in Tables 1 and 2.  
24  
25  
26 **304** Patients with hypertension *diagnosed* with COVID-19 were more likely to be hospitalized  
27  
28 **305** (range 1.3% to 41.1% vs 1.4 to 15.9%) and had increased mortality (range 0.3% to 18.5% vs  
29  
30 **306** 0.2% to 11.8%) when compared to those without hypertension (Table 1).  
31  
32

33  
34 **Table 1. Comparison of 30-day outcomes of interest between COVID-19 patients with**  
35  
36 **and without hypertension (HTN), in the COVID-19 diagnosed cohorts in the**  
37  
38 **CHARYBDIS Network, % (95%CI)**  
39

| Database                 | HTN     | N         | 30-day outcomes |                  |
|--------------------------|---------|-----------|-----------------|------------------|
|                          |         |           | Death           | Hospitalization  |
| IQVIA-OpenClaims<br>(US) | With    | 1,245,436 | -               | 29.6 (29.5-29.7) |
|                          | Without | 1,333,227 | -               | 8.9 (8.9-8.9)    |
| OPTUM-HER (US)           | With    | 6,6432    | 1.7 (1.6-1.8)   | 26.4 (26.1-26.7) |
|                          | Without | 11,1033   | 0.2 (0.2-0.2)   | 9.2 (9.0-9.4)    |

|                           |         |         |                  |                  |
|---------------------------|---------|---------|------------------|------------------|
| VA-OMOP (US)              | With    | 34,093  | 5.4 (5.2-5.6)    | 23.4 (23.0-23.8) |
|                           | Without | 21,464  | 0.7 (0.6-0.8)    | 6.1 (5.8-6.4)    |
| HEALTHVERITY<br>(US)      | With    | 25,405  | -                | 14.6 (14.2-15.0) |
|                           | Without | 88,768  | -                | 3.1 (3.0-3.2)    |
| SIDIAP (Spain)            | With    | 21,289  | 9.8 (9.4-10.2)   | 22.8 (22.2-23.4) |
|                           | Without | 100,852 | 3.3 (3.2-3.4)    | 11.2 (11.0-11.4) |
| CUIMC (US)                | With    | 3,672   | 11.8 (10.8-12.8) | 41.1 (39.5-42.7) |
|                           | Without | 4,847   | 2.0 (1.6-2.4)    | 15.9 (14.9-16.9) |
| CU-AMC-HDC (US)           | With    | 2,461   | 5.9 (5.0-6.8)    | 35.8 (33.9-37.7) |
|                           | Without | 4,809   | 0.7 (0.5-0.9)    | 11.2 (10.3-12.1) |
| IQVIA-DA<br>(Germany)     | With    | 2,418   | 0.3 (0.1-0.5)    | -                |
|                           | Without | 5,553   | -                | -                |
| STARR-OMOP (US)           | With    | 1,246   | 0.6 (0.2-1.0)    | 24.6 (22.2-27.0) |
|                           | Without | 2,082   | -                | 14.0 (12.5-15.5) |
| CPRD (UK)                 | With    | 756     | 18.5 (15.7-21.3) | -                |
|                           | Without | 2,616   | 11.8 (10.6-13.0) | -                |
| IPCI (The<br>Netherlands) | With    | 676     | 13.6 (11.0-16.2) | 1.3 (0.4-2.2)    |
|                           | Without | 2,371   | 3.1 (2.4-3.8)    | 1.4 (0.9-1.9)    |

Note: “-” means information is not available or <5 cases for all databases except for CU-AMC HDC where information is not available for <10 cases.

307

308 Patients with hypertension *hospitalized* with COVID-19 were more frequently diagnosed of  
309 ARDS (range 0.1 to 65.6% vs 0.1 to 54.7%), cardiac arrhythmia (range 0.5 to 45.8% vs 0.4 to  
310 36.8%), and had increased mortality (range 1.8 to 25.1% vs 0.7 to 10.9%) as compared to  
311 those without hypertension (Table 2).

**Table 2. Comparison of 30-days outcomes of interest between COVID-19 patients with and without hypertension (HTN), in the COVID-19 hospitalized cohorts in the CHARYBDIS Network, % (95%CI)**

| Database              | HTN*    | N       | 30-day outcomes |                  |                    |                  |                  |                    |                  |
|-----------------------|---------|---------|-----------------|------------------|--------------------|------------------|------------------|--------------------|------------------|
|                       |         |         | VTE†            | Death            | Cardiac arrhythmia | Sepsis           | ARDS‡            | Intensive services | Total CVE§       |
| IQVIA-OpenClaims (US) | With    | 384,508 | 3.9 (3.8-4.0)   | -                | 15.4 (15.3-15.5)   | 18.3 (18.2-18.4) | 34.8 (34.6-35.0) | 9.1 (9.0-9.2)      | 11.3 (11.2-11.4) |
|                       | Without | 118,425 | 3.8 (3.7-3.9)   | -                | 7.2 (7.1-7.3)      | 15.5 (15.3-15.7) | 31.3 (31.0-31.6) | 6.4 (6.3-6.5)      | 4.5 (4.4-4.6)    |
| OPTUM-HER (US)        | With    | 18,242  | 6.2 (5.9-6.5)   | 5.1 (4.8-5.4)    | 31.6 (30.9-32.3)   | 24.8 (24.2-25.4) | 45.7 (45.0-46.4) | 14.0 (13.5-14.5)   | 18.2 (17.6-18.8) |
|                       | Without | 10,222  | 4.4 (4.0-4.8)   | 1.6 (1.4-1.8)    | 11.1 (10.5-11.7)   | 15.0 (14.3-15.7) | 27.5 (26.6-28.4) | 6.3 (5.8-6.8)      | 4.8 (4.4-5.2)    |
| VA-OMOP (US)          | With    | 8,996   | 7.3 (6.8-7.8)   | 15.4 (14.7-16.1) | 33.9 (32.9-34.9)   | 20.0 (19.2-20.8) | 43.9 (42.9-44.9) | 17.1 (16.3-17.9)   | 21.0 (20.2-21.8) |
|                       | Without | 1,475   | 6.9 (5.6-8.2)   | 7.6 (6.2-9.0)    | 16.8 (14.9-18.7)   | 16.2 (14.3-18.1) | 39.6 (37.1-42.1) | 11.2 (9.6-12.8)    | 7.3 (6.0-8.6)    |
| HEALTHVERITY (US)     | With    | 4,512   | 3.6 (3.1-4.1)   | -                | 14.8 (13.8-15.8)   | 16.5 (15.4-17.6) | 26.7 (25.4-28.0) | 6.1 (5.4-6.8)      | 11.9 (11.0-12.8) |
|                       | Without | 3,069   | 3.9 (3.2-4.6)   | -                | 6.8 (5.9-7.7)      | 12.5 (11.3-13.7) | 23.9 (22.4-25.4) | 4.9 (4.1-5.7)      | 5.6 (4.8-6.4)    |

|                                                                                                                                                    |         |        |                 |                  |                  |                  |                  |                  |                  |
|----------------------------------------------------------------------------------------------------------------------------------------------------|---------|--------|-----------------|------------------|------------------|------------------|------------------|------------------|------------------|
| SIDIAP (Spain)                                                                                                                                     | With    | 5,636  | 1.0 (0.7-1.3)   | 15.4 (14.5-16.3) | 0.5 (0.3-0.7)    | -                | 0.1 (0.0-0.2)    | -                | 0.9 (0.7-1.1)    |
|                                                                                                                                                    | Without | 12,566 | 1.1 (0.9-1.3)   | 10.9 (10.4-11.4) | 0.4 (0.3-0.5)    | 0.0 (0.0-0.0)    | 0.1 (0.0-0.2)    | -                | 0.5 (0.4-0.6)    |
| CUIMC (US)                                                                                                                                         | With    | 1,708  | 3.9 (3.0-4.8)   | 25.1 (23.0-27.2) | 12.1 (10.6-13.6) | 6.1 (5.0-7.2)    | 16.0 (14.3-17.7) | 2.2 (1.5-2.9)    | 8.1 (6.8-9.4)    |
|                                                                                                                                                    | Without | 892    | 3.6 (2.4-4.8)   | 10.2 (8.2-12.2)  | 4.7 (3.3-6.1)    | 5.3 (3.8-6.8)    | 17.8 (15.3-20.3) | 1.8 (0.9-2.7)    | 3.8 (2.5-5.1)    |
| CU-AMC HDC (US)                                                                                                                                    | With    | 904    | 11.4 (9.3-13.5) | 14.9 (12.6-17.2) | 45.8 (42.6-49.0) | 34.2 (31.1-37.3) | 65.6 (62.5-68.7) | 28.3 (25.4-31.2) | 19.8 (17.2-22.4) |
|                                                                                                                                                    | Without | 530    | 6.0 (4.0-8.0)   | 6.0 (4.0-8.0)    | 36.8 (32.7-40.9) | 27.4 (23.6-31.2) | 54.7 (50.5-58.9) | 15.5 (12.4-18.6) | 5.7 (3.7-7.7)    |
| HIRA (South Korea)                                                                                                                                 | With    | 1,943  | 0.7 (0.3-1.1)   | 7.7 (6.5-8.9)    | 4.4 (3.5-5.3)    | 5.3 (4.3-6.3)    | 2.6 (1.9-3.3)    | 4.9 (3.9-5.9)    | 10.0 (8.7-11.3)  |
|                                                                                                                                                    | Without | 5,656  | NC              | 0.7 (0.5-0.9)    | 0.7 (0.5-0.9)    | 3.1 (2.6-3.6)    | 0.5 (0.3-0.7)    | 0.6 (0.4-0.8)    | 4.7 (4.1-5.3)    |
| STARR-OMOP (US)                                                                                                                                    | With    | 342    | 2.0 (0.5-3.5)   | 1.8 (0.4-3.2)    | 22.2 (17.8-26.6) | 9.9 (6.7-13.1)   | 12.6 (9.1-16.1)  | 9.1 (6.1-12.1)   | 16.4 (12.5-20.3) |
|                                                                                                                                                    | Without | 273    | NC              | -                | 6.6 (3.7-9.5)    | 7.0 (4.0-10.0)   | 11.4 (7.6-15.2)  | 5.5 (2.8-8.2)    | -                |
| HMAR (Spain)                                                                                                                                       | With    | 594    | 3.2 (1.8-4.6)   | 14.3 (11.5-17.1) | 23.1 (19.7-26.5) | 1.9 (0.8-3.0)    | 12.6 (9.9-15.3)  | 13.5 (10.8-16.2) | 12.1 (9.5-14.7)  |
|                                                                                                                                                    | Without | 1,417  | 2.6 (1.8-3.4)   | 3.9 (2.9-4.9)    | 6.6 (5.3-7.9)    | 0.7 (0.3-1.1)    | 7.3 (5.9-8.7)    | 6.6 (5.3-7.9)    | 2.2 (1.4-3.0)    |
| Note: “-” means information is not available or <5 cases for all databases except for CU-AMC HDC where information is not available for <10 cases. |         |        |                 |                  |                  |                  |                  |                  |                  |

1  
2  
3 \* hypertension; †: Venous thromboembolic (pulmonary embolism and deep vein thrombosis) events; ‡: Acute respiratory distress syndrome; §: cardiovascular disease  
4 events  
5  
6  
7  
8  
9  
10  
11  
12  
13  
14  
15  
16  
17  
18  
19  
20  
21  
22  
23  
24  
25  
26  
27  
28  
29  
30  
31  
32  
33  
34  
35  
36  
37  
38  
39  
40  
41  
42  
43  
44  
45  
46

For peer review only

1  
2  
3 **313 DISCUSSION**  
4

5 314 This large multinational, multi-database cohort study, reports a greater prevalence of  
6  
7 315 hypertension among patients *hospitalized* with COVID-19 compared to those *diagnosed* with  
8  
9 COVID-19. Patients with hypertension diagnosed and/or hospitalized with COVID-19 were  
10 316  
11 frequently diagnosed with obesity, heart disease, dyslipidaemia, and type 2 diabetes at  
12 317  
13 baseline, compared to those without hypertension. They were also more likely to experience  
14 318  
15 adverse outcomes including death and hospitalizations (in the COVID-19 *diagnosed cohort*)  
16 319  
17 and cardiac arrhythmia, ARDS and death (in the COVID-19 *hospitalized cohort*) than  
18 320  
19 patients without hypertension.  
20 321  
21  
22

23 322 This is the first large multinational study that characterizes both in and out-patients with  
24 323  
25 COVID-19, with and without prevalent hypertension. Hypertension was more prevalent in  
26 324  
27 hospitalized patients compared to those diagnosed with COVID-19 (range from 25.6% to  
28 325  
29 85.9% vs 17.4 to 61.4% respectively). The observed variability between databases is similar  
30 326  
31 to previous reports, where prevalence's ranged from 28.8%<sup>7</sup> to 60%<sup>15</sup>.  
32 327  
33

34 328 However, these results should be put into context given that our highest rate (in both COVID-  
35 329  
36 19 *diagnosed* and COVID-19 *hospitalized*) was observed in the VA-OMOP database from  
37 330  
38 the US Department of Veterans Affairs (mostly men of older age).  
39 331  
40

41 332 As in the general population with hypertension<sup>27</sup>, patients with hypertension diagnosed with  
42 333  
43 COVID-19 in this study were more frequently diagnosed with heart disease or type 2 diabetes  
44 334  
45 at baseline, than individuals without hypertension. These results are similar to what has been  
46 335  
47 previously published, where patients with hypertension and COVID-19 also reported a higher  
48 336  
49 prevalence of diabetes mellitus<sup>6,8,12</sup>, cardiovascular diseases (other than hypertension)<sup>8,12</sup>,  
50  
51 and chronic kidney disease<sup>8</sup> compared to those without hypertension. This study further  
52  
53 expands these previous findings identifying these same comorbidities in the out-patients  
54  
55  
56  
57  
58  
59  
60

1  
2  
3 337 diagnosed with COVID-19 and adds obesity and dyslipidaemia to the list of conditions more  
4  
5  
6 338 frequently found among patients with COVID-19 and hypertension compared to those  
7  
8 339 without hypertension. The higher prevalence of comorbid conditions found in this study  
9  
10  
11 340 among patients with hypertension *hospitalized* with COVID-19 compared to patients with  
12  
13 341 hypertension *diagnosed* with COVID-19 suggests a poorer baseline health status.  
14  
15  
16 342 Patients with hypertension *hospitalized* with COVID-19 were more likely to have worse  
17  
18 343 disease progression with higher rates of ARDS (Prevalence per cent change (PC) between  
19  
20 344 patients with and without hypertension ranging from -1.8% to 18.2%), more cardiac  
21  
22 345 arrhythmia (PC ranging from 0.1% to 20.5%) and increased mortality (PC ranging from 3.5%  
23  
24 346 to 14.9%). Previous studies have documented poorer clinical outcomes in patients with  
25  
26 347 hypertension hospitalized with COVID-19 (including ARDS)<sup>8, 12, 14, 19</sup>, the need for  
27  
28 348 mechanical ventilation, admission to intensive care units<sup>6, 13, 19</sup> or an increased mortality<sup>4,7,11-</sup>  
29  
30 349 <sup>13, 19</sup>. This study further showed that patients with hypertension *diagnosed* with COVID-19  
31  
32 350 were more likely to experience hospitalizations (PC between patients with and without  
33  
34 351 hypertension ranging from -0.1% to 25.6%), and deaths (PC from 1.5% to 10.5%). These  
35  
36 352 results highlight the importance of considering hypertension as a possible risk factor in the  
37  
38 353 overall population *diagnosed* and not only in those *hospitalized* with COVID-19. It also adds  
39  
40 354 to the current literature cardiac arrhythmia and cardiovascular diseases (other than  
41  
42 355 hypertension) to the list of adverse outcomes more frequently diagnosed among patients with  
43  
44 356 hypertension hospitalized with COVID-19 compared to those without hypertension.  
45  
46 357 This study has several strengths. This is the largest cohort study on individuals with  
47  
48 358 hypertension who were *diagnosed* and/or *hospitalized* with COVID-19 to date. It provides  
49  
50 359 novel insight into the characterization of patients *diagnosed* with COVID-19 and confers a  
51  
52 360 greater external validity of its results compared to what has been published up to date (only  
53  
54 361 *hospitalized* patients). It is also unique in its approach to characterizing COVID-19 cases  
55  
56  
57  
58  
59  
60



1  
2  
3 362 across an international network of healthcare databases, with diverse healthcare systems and  
4  
5 363 policies, through a comprehensive federated approach, allowing the analysis of 15 databases  
6  
7 364 without sharing patient identifiable data, hence respecting the patients' confidentiality at all  
8  
9 365 times.

10  
11  
12 366 We recognize there are limitations to our approach. First, this study was intentionally  
13  
14 367 descriptive and was deliberately not designed for causal inference. The observed differences  
15  
16 368 between groups (eg. with versus without hypertension) should therefore not be interpreted as  
17  
18 369 causal effects. Our patients were analysed depending on if they were *diagnosed* and/or  
19  
20 370 *hospitalized* with COVID-19 according to database registration procedures, however,  
21  
22 371 variations could have occurred during the processes by which patients were screened, tested,  
23  
24 372 admitted, and registered across time and the databases. Additionally, the diagnosed and/or  
25  
26 373 hospitalized cohorts were non-mutually exclusive, and therefore could be patients in the  
27  
28 374 diagnosed cohort who were also hospitalized and vice versa.

29  
30  
31 375 This study was carried out using data recorded in routine clinical practice based on EHRs  
32  
33 376 and/or claims, therefore, data could be incomplete or be erroneous, leading to potential  
34  
35 377 misclassification. We have therefore selectively reported database-specific outcomes to  
36  
37 378 minimize the impact of incompleteness. Differential reporting in databases is likely due to  
38  
39 379 different coding practices as well as variability in disease severity, with milder/less  
40  
41 380 symptomatic cases more likely being only diagnosed, and more severe ones hospitalized.  
42  
43 381 Finally, the data that underpinned this study mostly came from the initial months of the  
44  
45 382 COVID-19 pandemic and may not be representative of the COVID-19 cases diagnosed  
46  
47 383 and/or hospitalized during subsequent periods.

## 384 **CONCLUSIONS**

385 COVID-19 patients with hypertension are more likely to have comorbidities, experience  
386 more severe outcomes including hospitalizations and deaths (among outpatients with

1  
2  
3 387 COVID-19) and experience more ARDS and deaths (among inpatients' with COVID-19)  
4  
5 388 compared with patients without hypertension.  
6  
7  
8 389

9  
10 390 **FIGURE LEGENDS**

11  
12 391 **Figure 1. Comparison of the age and sex distribution in patients with a COVID-19**  
13  
14 392 **diagnosis with and without hypertension in the CHARYBDIS Network, %.** Colour Red=  
15  
16 393 with hypertension, Green= without hypertension.

17  
18 394 **Figure 2. Comparison of the age and sex distribution in patients with a COVID-19**  
19  
20 395 **hospitalization with and without hypertension in the CHARYBDIS Network, %.** Colour  
21  
22 396 Red=with hypertension, Colour Green=without hypertension.

23  
24 397 **Figure 3. Comorbidities at baseline among patients with a COVID-19 diagnosis with**  
25  
26 398 **and without hypertension in the CHARYBDIS Network, %.** Colour Red=with  
27  
28 399 hypertension, Colour Green=without hypertension.

29  
30 400 **Figure 4. Comorbidities at baseline among patients with a COVID-19 hospitalization**  
31  
32 401 **with and without hypertension in the CHARYBDIS Network, %.** Colour Red=with  
33  
34 402 hypertension, Colour Green=without hypertension.  
35  
36  
37  
38  
39

40 403  
41  
42 404 **CONTRIBUTOR'S STATEMENT**

43  
44 405 CR, AGS, CA, APU, AG, FN, AO, GH, PR, KK, TDS, KEL, SLD, MR, ER, SFB and AP  
45  
46 406 provided substantial contributions to the conception or design, analysis, and interpretation of  
47  
48 407 data for the work. CR, AGS, CA, APU, AG, FN, AO, GH, PR, KK, TDS, KEL, SLD, MR,  
49  
50 408 ER, SFB, AP, DP, NV, GdeM, LSR, JPH, JMR, ILM, NHS, PRy, MAS, MM, CB, LYHL,  
51  
52 409 TLA, W-U-RA, OA, HA, DD drafted or revised the manuscript critically for important  
53  
54 410 intellectual content. All authors approved the final version of the manuscript and CR, AGS,  
55  
56 411 CA, APU, AG, FN, AO, GH, PR, KK, TDS, LYHL, TLA, W-U-RA, OA, HA, DD, LMS,  
57  
58  
59  
60

1  
2  
3 412 CRei, JDP, SCY agreed to be accountable for all aspects of the work (KEL and SLD only for  
4  
5 413 VA data) in ensuring that questions related to the accuracy or integrity of any part of the  
6  
7  
8 414 work are appropriately investigated and resolved.  
9

10 415

## 11 416 **ACKNOWLEDGEMENTS**

12  
13  
14 417 We would like to acknowledge the patients who suffered from or died of this devastating  
15  
16 418 disease, and their families and carers. We also thank the healthcare professionals involved in  
17  
18 419 the management of COVID-19 during these challenging times, from primary care to intensive  
19  
20 420 care units. The authors appreciate the Korean Health Insurance Review and Assessment  
21  
22 421 Service for providing data.  
23

24  
25 422 We also thank the database curation teams around the world including the COVIDMAR  
26  
27 423 Group (JPHorcajada, R.Güerri, J.Villar, M.Montero, S.Gómez-Zorrilla, M.Arenas-Miras,  
28  
29 424 J.Gómez-Junyent, I.Arrieta, E.Sendra, S.Castañeda, E.Letang, I.Pelegrín, A.Rial,  
30  
31 425 J.Rodríguez, C.Gimenez, J.Soldado, E.García).  
32

33 426 We also thank the important contribution to this work of Dr Daniel Prieto-Alhambra.  
34  
35  
36  
37  
38 427

## 39 428 **DATA SHARING STATEMENT**

40  
41  
42 429 Open Science is a guiding principle within OHDSI. As such, we provide unfettered access to  
43  
44 430 all open-source analysis tools employed in this study via

45  
46 431 <https://github.com/ohdsi-studies/Covid19CharacterizationCharybdis>, as well as all data and

47  
48 432 results artefacts that do not include patient-level health information via

49  
50 433 <https://data.odhsi.org/Covid19CharacterizationCharybdis/>. Data partners contributing to this

51  
52 434 study remain custodians of their individual patient-level health information and hold either

53  
54 435 IRB exemption or approval for participation.  
55  
56  
57  
58 436

1  
2  
3 **437 REFERENCES**

- 4  
5 **438** 1- Weekly Operational Update on COVID-19-6 Sep 2021 [internet]. WHO [cited 9<sup>th</sup>  
6  
7  
8 **439** September 2021]. Available from [https://www.who.int/publications/m/item/weekly-](https://www.who.int/publications/m/item/weekly-operational-update-on-covid-19---6-september-2021)  
9  
10 **440** [operational-update-on-covid-19---6-september-2021](https://www.who.int/publications/m/item/weekly-operational-update-on-covid-19---6-september-2021).  
11  
12  
13 **441** 2- Unger T, Borghi C, Charchar F, Khan NA, Poulter NR, Prabhakaran D, et al. 2020  
14  
15 **442** International Society of Hypertension global hypertension practice guidelines. *J Hypertens.*  
16  
17 **443** 2020;38:982-1004.  
18  
19  
20 **444** 3-Cook TM. The importance of hypertension as a risk factor for severe illness and mortality  
21  
22 **445** in COVID-19. *Anaesthesia.* 2020;75:976-977.  
23  
24  
25 **446** 4-Gupta S, Hayek SS, Wang W, Chan L, Mathews KS, Melamed ML, et al. Factors  
26  
27 **447** Associated With Death in Critically Ill Patients With Coronavirus Disease 2019 in the US.  
28  
29 **448** *JAMA Intern Med.* 2020;180:1–12.  
30  
31  
32 **449** 5-Jiménez E, Fontán-Vela M, Valencia J, Fernandez-Jimenez I, Álvaro-Alonso EA,  
33  
34 **450** Izquierdo-García E, et al. Characteristics, complications and outcomes among 1549 patients  
35  
36 **451** hospitalised with COVID-19 in a secondary hospital in Madrid, Spain: a retrospective case  
37  
38 **452** series study. *BMJ Open.* 2020;10:e042398.  
39  
40  
41 **453** 6-Huang S, Wang J, Liu F, Liu J, Cao G, Yang C, et al. COVID-19 patients with  
42  
43 **454** hypertension have more severe disease: a multicenter retrospective observational study.  
44  
45 **455** *Hypertens Res.* 2020;43:824-831.  
46  
47  
48 **456** 7-Park BE, Lee JH, Park HK, Kim HN, Jang SY, Bae MH, et al. Impact of Cardiovascular  
49  
50 **457** Risk Factors and Cardiovascular Diseases on Outcomes in Patients Hospitalized with  
51  
52 **458** COVID-19 in Daegu Metropolitan City. *J Korean Med Sci.* 2021;36:e15.  
53  
54  
55  
56  
57  
58  
59  
60

- 1  
2  
3 459 8- Yao Q, Ni J, Hu TT, Cai ZL, Zhao JH, Xie QW, et al. Clinical characteristics and  
4  
5  
6 460 outcomes in coronavirus disease 2019 (COVID-19) patients with and without hypertension: a  
7  
8 461 retrospective study. *Rev Cardiovasc Med.* 2020;21:615-625.  
9  
10  
11 462 9- Zhou F, Yu T, Du R, Fan G, Liu Y, Liu Z, et al. Clinical course and risk factors for  
12  
13 463 mortality of adult inpatients with COVID-19 in Wuhan, China: a retrospective cohort study.  
14  
15 464 *Lancet.* 2020;395(10229):1054-1062.  
16  
17  
18 465 10-Wang Y, Lu X, Li Y, Chen H, Chen T, Su N, et al. Clinical Course and Outcomes of 344  
19  
20 466 Intensive Care Patients with COVID-19. *Am J Respir Crit Care Med.* 2020;201:1430-1434.  
21  
22  
23 467 11-Grasselli G, Zangrillo A, Zanella A, Antonelli M, Cabrini L, Castelli A, et al. Baseline  
24  
25 468 Characteristics and Outcomes of 1591 Patients Infected With SARS-CoV-2 Admitted to  
26  
27 469 ICUs of the Lombardy Region, Italy. *JAMA.* 2020;323:1574-1581.  
28  
29  
30 470 12-Gao C, Cai Y, Zhang K, Zhou L, Zhang Y, Zhang X, et al. Association of hypertension  
31  
32 471 and antihypertensive treatment with COVID-19 mortality: a retrospective observational  
33  
34 472 study. *Eur Heart J.* 2020;41:2058-2066.  
35  
36  
37 473 13- Guan WJ, Liang WH, Zhao Y, Liang HR, Chen ZS, Li YM, et al. Comorbidity and its  
38  
39 474 impact on 1590 patients with COVID-19 in China: a nationwide analysis. *Eur Respir J.*  
40  
41 475 2020;55:2000547.  
42  
43  
44 476 14- Ji W, Huh K, Kang M, Hong J, Bae GH, Lee R, et al. Effect of Underlying Comorbidities  
45  
46 477 on the Infection and Severity of COVID-19 in Korea: a Nationwide Case-Control Study. *J*  
47  
48 478 *Korean Med Sci.* 2020;35:e237.  
49  
50  
51 479 15- Chilimuri S, Sun H, Alemam A, Mantri N, Shehi E, Tejada J, et al. Predictors of  
52  
53 480 Mortality in Adults Admitted with COVID-19: Retrospective Cohort Study from New York  
54  
55 481 City. *West J Emerg Med.* 2020;21:779-784.  
56  
57  
58  
59  
60

- 1  
2  
3 482 16- Richardson S, Hirsch JS, Narasimhan M, Crawford JM, McGinn T, Davidson KW, et al.  
4  
5  
6 483 Presenting Characteristics, Comorbidities, and Outcomes Among 5700 Patients Hospitalized  
7  
8 484 With COVID-19 in the New York City Area. *JAMA*. 2020;323:2052-2059. Erratum in:  
9  
10 485 *JAMA*. 2020;323:2098.  
11  
12  
13 486 17-Dorjee K, Kim H, Bonomo E, Dolma R. Prevalence and predictors of death and severe  
14  
15 487 disease in patients hospitalized due to COVID-19: A comprehensive systematic review and  
16  
17 488 meta-analysis of 77 studies and 38,000 patients. *PLoS One*. 2020;15:e0243191.  
18  
19  
20 489 18-Javanmardi F, Keshavarzi A, Akbari A, Emami A, Pirbonyeh N. Prevalence of underlying  
21  
22 490 diseases in dead cases of COVID-19: A systematic review and meta-analysis. *PLoS One*.  
23  
24 491 2020;15:e0241265.  
25  
26  
27 492 19-Pranata R, Lim MA, Huang I, Raharjo SB, Lukito AA. Hypertension is associated with  
28  
29 493 increased mortality and severity of disease in COVID-19 pneumonia: A systematic review,  
30  
31 494 meta-analysis and meta-regression. *J Renin Angiotensin Aldosterone Syst*.  
32  
33 495 2020;21:1470320320926899.  
34  
35  
36 496 20- Silverio A, Di Maio M, Citro R, Esposito L, Iuliano G, Bellino M, et al. Cardiovascular  
37  
38 497 risk factors and mortality in hospitalized patients with COVID-19: systematic review and  
39  
40 498 meta-analysis of 45 studies and 18,300 patients. *BMC Cardiovasc Disord*. 2021;21:23.  
41  
42  
43 499 21- Moazzami B, Chaichian S, Kasaeian A, Djalalinia S, Akhlaghdoust M, Eslami M, et al.  
44  
45 500 Metabolic risk factors and risk of Covid-19: A systematic review and meta-analysis. *PLoS*  
46  
47 501 *One*. 2020;15:e0243600.  
48  
49  
50 502 22- Baj J, Karakuła-Juchnowicz H, Teresiński G, Buszewicz G, Ciesielka M, Sitarz E, et al.  
51  
52 503 COVID-19: Specific and Non-Specific Clinical Manifestations and Symptoms: The Current  
53  
54 504 State of Knowledge. *J Clin Med*. 2020;9:1753.  
55  
56  
57  
58  
59  
60

- 1  
2  
3 505 23- Prieto-Alhambra D, Kostka K, Duarte-Salles T, Prats-Urbe A, Sena A, Pistillo A, et al.  
4  
5 506 Unraveling COVID-19: a large-scale characterization of 4.5 million COVID-19 cases using  
6  
7 507 CHARYBDIS. Res Sq [Preprint]. 2021:rs.3.rs-279400.  
8  
9  
10 508 24- García-Gil M del M, Hermosilla E, Prieto-Alhambra D, Fina F, Rosell M, Ramos R, et al.  
11  
12 509 Construction and validation of a scoring system for the selection of high-quality data in a  
13  
14 510 Spanish population primary care database (SIDIAP). Inform Prim Care. 2011; 19(3): 135–45  
15  
16  
17 511 25-Datta S, Posada J, Olson G, Li W, O'Reilly C, Balraj D, et al. A new paradigm for  
18  
19 512 accelerating clinical data science at Stanford Medicine. arXiv:2003.10534  
20  
21  
22 513 26-Voss EA, Makadia R, Matcho A, Ma Q, Knoll C, Schuemie M, et al. Feasibility and  
23  
24 514 utility of applications of the common data model to multiple, disparate observational health  
25  
26 515 databases. J Am Med Inform Assoc. 2015;22:553-64.  
27  
28  
29 516 27-Tsimihodimos V, Gonzalez-Villalpando C, Meigs JB, Ferrannini E. Hypertension and  
30  
31 517 Diabetes Mellitus: Coprediction and Time Trajectories. Hypertension. 2018;71:422-428.  
32  
33 518  
34  
35 519  
36  
37  
38  
39  
40  
41  
42  
43  
44  
45  
46  
47  
48  
49  
50  
51  
52  
53  
54  
55  
56  
57  
58  
59  
60

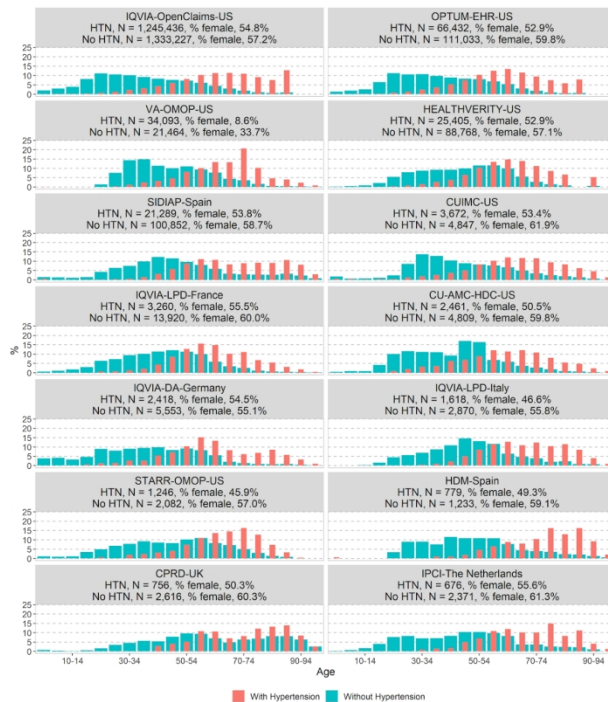

Comparison of the age and sex distribution in patients with a COVID-19 diagnosis with and without hypertension in the CHARYBDIS Network, %. Colour Red= with hypertension, Green= without hypertension.

531x752mm (79 x 79 DPI)



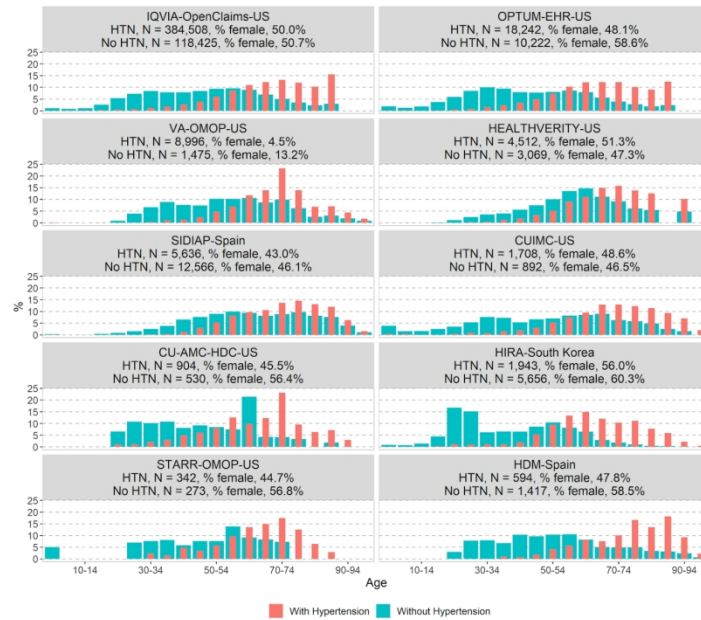

Comparison of the age and sex distribution in patients with a COVID-19 hospitalization with and without hypertension in the CHARYBDIS Network, %. Colour Red=with hypertension, Colour Green=without hypertension.

532x752mm (79 x 79 DPI)

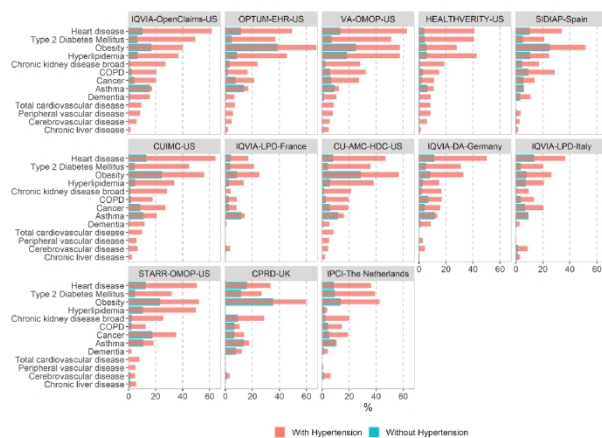

Comorbidities at baseline among patients with a COVID-19 diagnosis with and without hypertension in the CHARYBDIS Network, %. Colour Red=with hypertension, Colour Green=without hypertension.

210x297mm (300 x 300 DPI)

1  
2  
3  
4  
5  
6  
7  
8  
9  
10  
11  
12  
13  
14  
15  
16  
17  
18  
19  
20  
21  
22  
23  
24  
25  
26  
27  
28  
29  
30  
31  
32  
33  
34  
35  
36  
37  
38  
39  
40  
41  
42  
43  
44  
45  
46  
47  
48  
49  
50  
51  
52  
53  
54  
55  
56  
57  
58  
59  
60

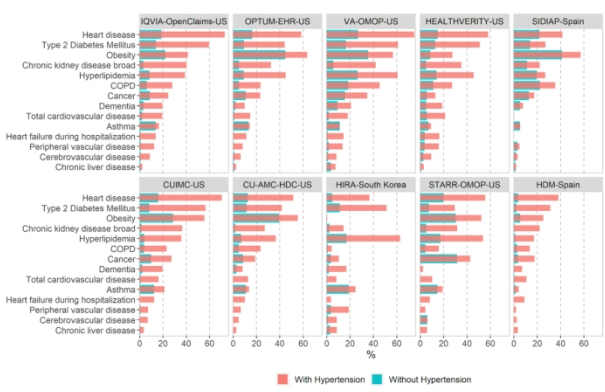

Comorbidities at baseline among patients with a COVID-19 hospitalization with and without hypertension in the CHARYBDIS Network, %. Colour Red=with hypertension, Colour Green=without hypertension.

532x752mm (79 x 79 DPI)

# Supporting Figure 1. Flowchart showing the selection of databases included in the analyses

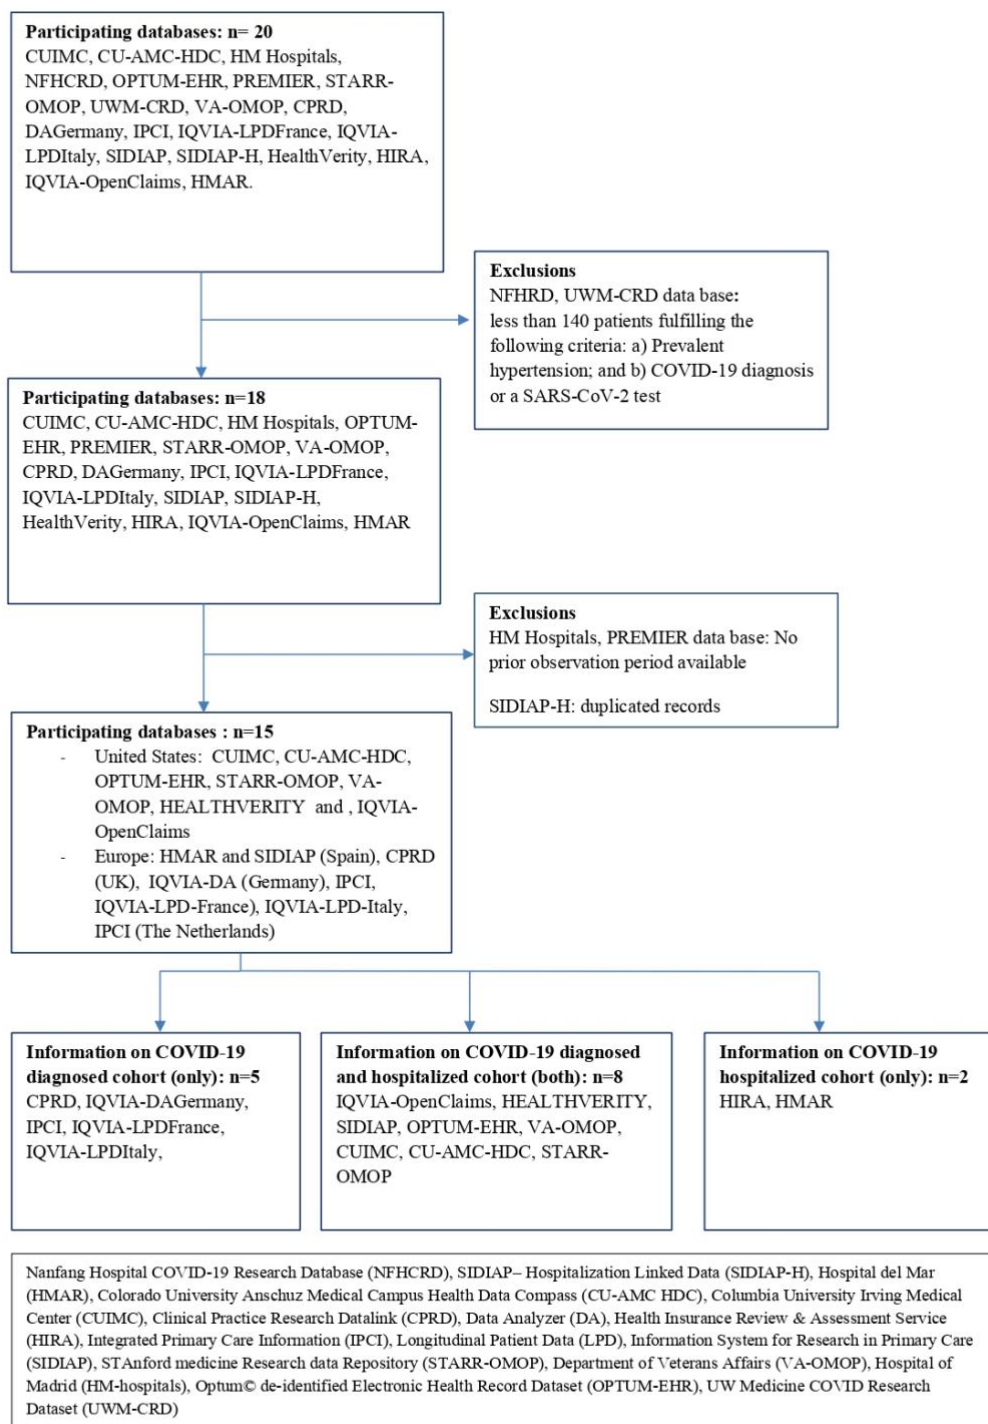

## Supporting Table 1. Description of included databases

| Institution Name/<br>Database                                                    | Database Description                                                                                                                                                                                                                                                                                                                                                                                                                                                                                                                                                                                                                                                                                                                                                                                                                                                                                                                                                                                                                                         | Country        |
|----------------------------------------------------------------------------------|--------------------------------------------------------------------------------------------------------------------------------------------------------------------------------------------------------------------------------------------------------------------------------------------------------------------------------------------------------------------------------------------------------------------------------------------------------------------------------------------------------------------------------------------------------------------------------------------------------------------------------------------------------------------------------------------------------------------------------------------------------------------------------------------------------------------------------------------------------------------------------------------------------------------------------------------------------------------------------------------------------------------------------------------------------------|----------------|
| Janssen Research & Development<br>The Clinical Practice Research Datalink (CPRD) | The Clinical Practice Research Datalink (CPRD) is a governmental not-for-profit research service jointly funded by the NHS National Institute for Health Research (NIHR) and the Medicines and Healthcare products Regulatory Agency (MHRA) a part of the Department of Health United Kingdom (UK). CPRD consists of data collected from UK primary care for all ages. This includes conditions observations measurements and procedures that the general practitioner is made aware of in addition to any prescriptions as prescribed by the general practitioner. In addition to primary care there are also linked secondary care records for a small number of people. The major data elements contained within this database are outpatient prescriptions given by the general practitioner (coded with Multilex codes) and outpatient clinical referral immunization or test events that the general practitioner knows about (coded in Read or ICD10 or LOINC codes). The database also contains the patients' year of births and any date of deaths. | United Kingdom |
| IDIAPJGol<br>The Information System for Research in Primary Care (SIDIAP)        | The Information System for Research in Primary Care (SIDIAP; www.sidiap.org) is a primary care records database that covers approximately 80% of the population of Catalonia North-East Spain. Healthcare is universal and tax-payer funded in the region and primary care physicians are gatekeepers for all care and responsible for repeat prescriptions.                                                                                                                                                                                                                                                                                                                                                                                                                                                                                                                                                                                                                                                                                                 | Spain          |
| Stanford Medicine Research Data Repository (STARR-OMOP)                          | A clinical data warehouse containing live Epic data from Stanford Health Care the Stanford Children's Hospital                                                                                                                                                                                                                                                                                                                                                                                                                                                                                                                                                                                                                                                                                                                                                                                                                                                                                                                                               | United States  |

|                                                      |                                                                                                                                                                                                                                                                                                                                                                                                                                                                                                                                                                                                                                                                                                                                                                                        |               |
|------------------------------------------------------|----------------------------------------------------------------------------------------------------------------------------------------------------------------------------------------------------------------------------------------------------------------------------------------------------------------------------------------------------------------------------------------------------------------------------------------------------------------------------------------------------------------------------------------------------------------------------------------------------------------------------------------------------------------------------------------------------------------------------------------------------------------------------------------|---------------|
|                                                      | the University Healthcare Alliance and Packard Children's Health Alliance clinics.<br>Reference: Datta S Posada J Olson G <i>et al.</i> A new paradigm for accelerating clinical data science at Stanford Medicine. <i>arXiv</i> 2020; published online March 17. <a href="http://arxiv.org/abs/2003.10534">http://arxiv.org/abs/2003.10534</a> (accessed Aug 20 2020).                                                                                                                                                                                                                                                                                                                                                                                                                |               |
| Columbia University Irving Medical Center (CUIMC)    | The clinical data warehouse of New York-Presbyterian Hospital/Columbia University Irving Medical Center New York NY based on its current and previous electronic health record systems with data spanning over 30 years and including over 6 million patients                                                                                                                                                                                                                                                                                                                                                                                                                                                                                                                          | United States |
| IQVIA<br>Open Claims                                 | Pre-adjudicated claims covering over 300 Million lives (~80% of the US) collected from office-based physicians and specialists via office management software and clearinghouse switch sources for the purpose of reimbursement.                                                                                                                                                                                                                                                                                                                                                                                                                                                                                                                                                       | United States |
| HIRA<br>Health Insurance Review & Assessment Service | National claim data from a single insurance service from South Korea, It contains the observational medical records (including both inpatient and outpatient) of a patient while they are qualified to get the national medical insurance.                                                                                                                                                                                                                                                                                                                                                                                                                                                                                                                                             | South Korea   |
| HMAR<br>Hospital del mar                             | Anonymized data from the Electronic Medical Records from Hospital del Mar (Barcelona, Spain). Hospital belonging to the Spanish National Health System (public), attending the Eastern area of Barcelona City. Includes hospital data collected routinely in the clinical practice, both structured and unstructured information, extracted using a free text analysis tool (with natural language processing): Inpatient (hospital) care, Outpatient specialist care, Emergency Room Visits and partial information from other settings like primary care and pharmacy care present in free text notes from EMRs. All subjects with at least one healthcare encounter with the Hospital within approximately last 20 years are included (approximately 0.6 M subjects, with more than | Spain         |

|                                                                    |                                                                                                                                                                                                                                                                                                                                                                                                                                                                                                                                                         |                 |
|--------------------------------------------------------------------|---------------------------------------------------------------------------------------------------------------------------------------------------------------------------------------------------------------------------------------------------------------------------------------------------------------------------------------------------------------------------------------------------------------------------------------------------------------------------------------------------------------------------------------------------------|-----------------|
|                                                                    | 5 M hospitalizations/visits). Hospital del Mar data are made available through collaboration with TFS / IOMED.                                                                                                                                                                                                                                                                                                                                                                                                                                          |                 |
| OPTUM-EHR<br>Optum® de-identified Electronic Health Record Dataset | Optum ® de-identified Electronic Health Record Dataset is derived from dozens of healthcare provider organizations in the United States (that include more than 700 hospitals and 7,000 Clinics treating more than 103 million patients) receiving care in the United States. The medical record data includes clinical information, inclusive of prescriptions as prescribed and administered, lab results, vital signs, body measurements, diagnoses, procedures, and information derived from clinical Notes using Natural Language Processing (NLP) | United States   |
| IPCI<br>Integrated Primary Care Information                        | The Integrated Primary Care Information (IPCI) database is collected from EHR records of patients registered with 391 GPs throughout the Netherlands. The database contains records from approximately 2.6 million patients out of a Dutch population of 17M (8.2%) starting in 1996.                                                                                                                                                                                                                                                                   | The Netherlands |
| DA Germany<br>IQVIA Disease Analyser Germany                       | IQVIA DA Germany is collected from extracts of patient management software used by GPs and specialists practicing in ambulatory care settings. Data coverage includes more than 34M distinct person records out of a total population of 80M (42.5%) in the country and collected from 2,734 providers. Dates of service include from 1992 through March 2020                                                                                                                                                                                           | Germany         |
| LPD-Italy<br>IQVIA LPD Italy                                       | LPD Italy is comprised of anonymised patient records collected from software used by GPs during an office visit to document patients' clinical records. Data coverage includes over 2M patient records with at least one visit and 119.5M prescription orders across 900 GP practices. Dates of service include from 2004 through                                                                                                                                                                                                                       | Italy           |

|                                                                                 |                                                                                                                                                                                                                                                                                                                                                                                                                                                                                                                                           |               |
|---------------------------------------------------------------------------------|-------------------------------------------------------------------------------------------------------------------------------------------------------------------------------------------------------------------------------------------------------------------------------------------------------------------------------------------------------------------------------------------------------------------------------------------------------------------------------------------------------------------------------------------|---------------|
|                                                                                 | present. Observation time is defined by the first and last consultation dates. Drugs are captured as prescription records with product, quantity, dosing directions, strength, indication and date of consultation.                                                                                                                                                                                                                                                                                                                       |               |
| LPD-France                                                                      | LPD France is a computerised network of physicians including GPs who contribute to a centralised database of anonymised patient EMR. Currently, >1200 GPs from 400 practices are contributing to the database covering 7.8M patients in France. The database covers a time period from 1994 through the present. Observation time is defined by the first and last consultation dates. Drug information is derived from GP prescriptions. Drugs obtained over the counter by the patient outside the prescription system are not reported | France        |
| HEALTHVERITY                                                                    | This HealthVerity derived data set contains de-identified patient information with an antibody and/or diagnostic test for COVID-19 linked to all available Medical Claims and Pharmacy Data from select private data providers participating in the HealthVerity marketplace.                                                                                                                                                                                                                                                             | United States |
| University of Colorado Anschutz Medical Campus Health Data Compass (CU-AMC HDC) | Health Data Compass (HDC) is a multi-institutional data warehouse. HDC contains inpatient and outpatient electronic medical data including patient, encounter, diagnosis, procedures, medications, laboratory results from two electronic medical record systems (UCHealth and Children's Hospital of Colorado), state-level all-payers claims data, and the Colorado death registry. Acknowledgement statement: Supported by the Health Data Compass Data Warehouse project (healthdatacompass.org)                                      |               |
| Department of Veterans Affairs<br>VA- OMOP                                      | VA-OMOP data reflects the national Department of Veterans Affairs health care system which is the largest integrated provider of medical and mental health services                                                                                                                                                                                                                                                                                                                                                                       | United States |



in the United States. Care is provided at 170 VA Medical Centers and 1 063 outpatient sites serving more than 9 million enrolled Veterans each year.

## Supporting Table 2. Definitions and codes used to identify COVID-19 cases

The below tables summarises the concepts used to identify patients diagnosed with COVID-19 . The full description of the logic used to identify patients diagnosed and hospitalized is provided at <https://atlas.ohdsi.org/#/cohortdefinition/200> and <https://atlas.ohdsi.org/#/cohortdefinition/197> respectively.

| COVID-19 condition codes |                                                            |                |
|--------------------------|------------------------------------------------------------|----------------|
| Id                       | Name                                                       | Vocabulary     |
| 756023                   | Acute bronchitis due to COVID-19                           | OMOP Extension |
| 756044                   | Acute respiratory distress syndrome (ARDS) due to COVID-19 | OMOP Extension |
| 756061                   | Asymptomatic COVID-19                                      | OMOP Extension |
| 756031                   | Bronchitis due to COVID-19                                 | OMOP Extension |
| 439676                   | Coronavirus infection                                      | SNOMED         |
| 37311061                 | Disease caused by 2019-nCoV                                | SNOMED         |
| 4100065                  | Disease due to Coronaviridae                               | SNOMED         |
| 37310284                 | Encephalopathy caused by 2019 novel coronavirus            | SNOMED         |

|                                                                                                                          |                                                                       |                   |
|--------------------------------------------------------------------------------------------------------------------------|-----------------------------------------------------------------------|-------------------|
| 37310283                                                                                                                 | Gastroenteritis caused by 2019 novel coronavirus                      | SNOMED            |
| 4248811                                                                                                                  | Healthcare associated severe acute respiratory syndrome               | SNOMED            |
| 756081                                                                                                                   | Infection of lower respiratory tract due to COVID-19                  | OMOP<br>Extension |
| 37310286                                                                                                                 | Infection of upper respiratory tract caused by 2019 novel coronavirus | SNOMED            |
| 45763594                                                                                                                 | Middle East respiratory syndrome                                      | SNOMED            |
| 37310287                                                                                                                 | Myocarditis caused by 2019 novel coronavirus                          | SNOMED            |
| 37310254                                                                                                                 | Otitis media caused by 2019 novel coronavirus                         | SNOMED            |
| 37310285                                                                                                                 | Pneumonia caused by 2019 novel coronavirus                            | SNOMED            |
| 37016927                                                                                                                 | Pneumonia caused by Human coronavirus                                 | SNOMED            |
| 40479642                                                                                                                 | Pneumonia due to Severe acute respiratory syndrome coronavirus        | SNOMED            |
| 756039                                                                                                                   | Respiratory infection due to COVID-19                                 | OMOP<br>Extension |
| 320651                                                                                                                   | Severe acute respiratory syndrome                                     | SNOMED            |
| 37396171                                                                                                                 | Severe acute respiratory syndrome of upper respiratory tract          | SNOMED            |
| 37311060                                                                                                                 | Suspected disease caused by 2019-nCoV                                 | SNOMED            |
| <b>COVID-19 specific testing - Positive</b>                                                                              |                                                                       |                   |
| 37310282                                                                                                                 | 2019 novel coronavirus detected                                       | SNOMED            |
| <b>COVID-19 specific testing (note these required a corresponding value as concept of: Detected Positive or Present)</b> |                                                                       |                   |

|          |                                                                                                                                                                                  |                |
|----------|----------------------------------------------------------------------------------------------------------------------------------------------------------------------------------|----------------|
| 37310255 | Detection of 2019 novel coronavirus using polymerase chain reaction technique                                                                                                    | SNOMED         |
| 700360   | Infectious agent detection by nucleic acid (DNA or RNA); severe acute respiratory syndrome coronavirus 2 (SARS-CoV-2) (Coronavirus disease [COVID-19]) amplified probe technique | CPT4           |
| 37310258 | Measurement of 2019 novel coronavirus antibody                                                                                                                                   | SNOMED         |
| 37310257 | Measurement of 2019 novel coronavirus antigen                                                                                                                                    | SNOMED         |
| 756055   | Measurement of Severe acute respiratory syndrome coronavirus 2 (SARS-CoV-2)                                                                                                      | OMOP Extension |
| 586310   | Measurement of Severe acute respiratory syndrome coronavirus 2 (SARS-CoV-2) Genetic material using Molecular method                                                              | OMOP Extension |
| 704991   | Measurement of Severe acute respiratory syndrome coronavirus 2 (SARS-CoV-2) in Blood                                                                                             | OMOP Extension |
| 756029   | Measurement of Severe acute respiratory syndrome coronavirus 2 (SARS-CoV-2) in Respiratory specimen                                                                              | OMOP Extension |
| 586307   | Measurement of Severe acute respiratory syndrome coronavirus 2 (SARS-CoV-2) in Saliva                                                                                            | OMOP Extension |
| 705107   | Measurement of Severe acute respiratory syndrome coronavirus 2 (SARS-CoV-2) in Sample from nose                                                                                  | OMOP Extension |
| 586309   | Measurement of Severe acute respiratory syndrome coronavirus 2 (SARS-CoV-2) in Specified specimen                                                                                | OMOP Extension |
| 756065   | Measurement of Severe acute respiratory syndrome coronavirus 2 (SARS-CoV-2) in Unspecified specimen                                                                              | OMOP Extension |
| 704992   | Measurement of Severe acute respiratory syndrome coronavirus 2 (SARS-CoV-2) using Culture method                                                                                 | OMOP Extension |
| 705001   | Measurement of Severe acute respiratory syndrome coronavirus 2 (SARS-CoV-2) using Nucleic acid amplification technique                                                           | OMOP Extension |
| 705000   | Measurement of Severe acute respiratory syndrome coronavirus 2 (SARS-CoV-2) using Nucleic acid amplification technique in Blood                                                  | OMOP Extension |
| 756085   | Measurement of Severe acute respiratory syndrome coronavirus 2 (SARS-CoV-2) using Nucleic acid amplification technique in Respiratory specimen                                   | OMOP Extension |
| 586308   | Measurement of Severe acute respiratory syndrome coronavirus 2 (SARS-CoV-2) using Nucleic acid amplification technique in Saliva                                                 | OMOP Extension |
| 705106   | Measurement of Severe acute respiratory syndrome coronavirus 2 (SARS-CoV-2) using Nucleic acid amplification technique in Sample from nose                                       | OMOP Extension |
| 756084   | Measurement of Severe acute respiratory syndrome coronavirus 2 (SARS-CoV-2) using Nucleic acid amplification technique in Unspecified specimen                                   | OMOP Extension |
| 704993   | Measurement of Severe acute respiratory syndrome coronavirus 2 (SARS-CoV-2) using Sequencing                                                                                     | OMOP Extension |

|        |                                                                                                     |       |
|--------|-----------------------------------------------------------------------------------------------------|-------|
| 586516 | SARS-CoV-2 (COVID19) [Presence] in Unspecified specimen by Organism specific culture                | LOINC |
| 723480 | SARS-CoV-2 (COVID19) Ab [Interpretation] in Serum or Plasma                                         | LOINC |
| 586515 | SARS-CoV-2 (COVID19) Ab [Presence] in Serum or Plasma by Immunoassay                                | LOINC |
| 586522 | SARS-CoV-2 (COVID19) Ab [Units/volume] in Serum or Plasma by Immunoassay                            | LOINC |
| 706179 | SARS-CoV-2 (COVID19) Ab panel - Serum or Plasma by Immunoassay                                      | LOINC |
| 723477 | SARS-CoV-2 (COVID19) Ag [Presence] in Respiratory specimen by Rapid immunoassay                     | LOINC |
| 706166 | SARS-CoV-2 (COVID19) E gene [Cycle Threshold #] in Unspecified specimen by NAA with probe detection | LOINC |
| 586523 | SARS-CoV-2 (COVID19) E gene [Presence] in Respiratory specimen by NAA with probe detection          | LOINC |
| 586518 | SARS-CoV-2 (COVID19) E gene [Presence] in Serum or Plasma by NAA with probe detection               | LOINC |
| 706174 | SARS-CoV-2 (COVID19) E gene [Presence] in Unspecified specimen by NAA with probe detection          | LOINC |
| 723473 | SARS-CoV-2 (COVID19) IgA Ab [Presence] in Serum or Plasma by Immunoassay                            | LOINC |
| 586521 | SARS-CoV-2 (COVID19) IgA Ab [Presence] in Serum Plasma or Blood by Rapid immunoassay                | LOINC |
| 723459 | SARS-CoV-2 (COVID19) IgA Ab [Units/volume] in Serum or Plasma by Immunoassay                        | LOINC |
| 757686 | SARS-CoV-2 (COVID19) IgA+IgM [Presence] in Serum or Plasma by Immunoassay                           | LOINC |
| 586527 | SARS-CoV-2 (COVID19) IgG Ab [Presence] in DBS by Immunoassay                                        | LOINC |
| 723474 | SARS-CoV-2 (COVID19) IgG Ab [Presence] in Serum or Plasma by Immunoassay                            | LOINC |
| 706181 | SARS-CoV-2 (COVID19) IgG Ab [Presence] in Serum Plasma or Blood by Rapid immunoassay                | LOINC |
| 706177 | SARS-CoV-2 (COVID19) IgG Ab [Units/volume] in Serum or Plasma by Immunoassay                        | LOINC |
| 706176 | SARS-CoV-2 (COVID19) IgG and IgM panel - Serum Plasma or Blood by Rapid immunoassay                 | LOINC |
| 723479 | SARS-CoV-2 (COVID19) IgG+IgM Ab [Presence] in Serum or Plasma by Immunoassay                        | LOINC |

|        |                                                                                                                                     |       |
|--------|-------------------------------------------------------------------------------------------------------------------------------------|-------|
| 723475 | SARS-CoV-2 (COVID19) IgM Ab [Presence] in Serum or Plasma by Immunoassay                                                            | LOINC |
| 706180 | SARS-CoV-2 (COVID19) IgM Ab [Presence] in Serum Plasma or Blood by Rapid immunoassay                                                | LOINC |
| 706178 | SARS-CoV-2 (COVID19) IgM Ab [Units/volume] in Serum or Plasma by Immunoassay                                                        | LOINC |
| 706167 | SARS-CoV-2 (COVID19) N gene [Cycle Threshold #] in Unspecified specimen by NAA with probe detection                                 | LOINC |
| 706157 | SARS-CoV-2 (COVID19) N gene [Cycle Threshold #] in Unspecified specimen by Nucleic acid amplification using CDC primer-probe set N1 | LOINC |
| 706155 | SARS-CoV-2 (COVID19) N gene [Cycle Threshold #] in Unspecified specimen by Nucleic acid amplification using CDC primer-probe set N2 | LOINC |
| 715272 | SARS-CoV-2 (COVID19) N gene [Presence] in Nasopharynx by NAA with probe detection                                                   | LOINC |
| 757678 | SARS-CoV-2 (COVID19) N gene [Presence] in Nose by NAA with probe detection                                                          | LOINC |
| 706161 | SARS-CoV-2 (COVID19) N gene [Presence] in Respiratory specimen by NAA with probe detection                                          | LOINC |
| 586524 | SARS-CoV-2 (COVID19) N gene [Presence] in Respiratory specimen by Nucleic acid amplification using CDC primer-probe set N1          | LOINC |
| 586525 | SARS-CoV-2 (COVID19) N gene [Presence] in Respiratory specimen by Nucleic acid amplification using CDC primer-probe set N2          | LOINC |
| 586520 | SARS-CoV-2 (COVID19) N gene [Presence] in Serum or Plasma by NAA with probe detection                                               | LOINC |
| 706175 | SARS-CoV-2 (COVID19) N gene [Presence] in Unspecified specimen by NAA with probe detection                                          | LOINC |
| 706156 | SARS-CoV-2 (COVID19) N gene [Presence] in Unspecified specimen by Nucleic acid amplification using CDC primer-probe set N1          | LOINC |
| 706154 | SARS-CoV-2 (COVID19) N gene [Presence] in Unspecified specimen by Nucleic acid amplification using CDC primer-probe set N2          | LOINC |
| 757680 | SARS-CoV-2 (COVID19) neutralizing antibody [Presence] in Serum by pVNT                                                              | LOINC |
| 757679 | SARS-CoV-2 (COVID19) neutralizing antibody [Titer] in Serum by pVNT                                                                 | LOINC |
| 723469 | SARS-CoV-2 (COVID19) ORF1ab region [Cycle Threshold #] in Respiratory specimen by NAA with probe detection                          | LOINC |
| 706168 | SARS-CoV-2 (COVID19) ORF1ab region [Cycle Threshold #] in Unspecified specimen by NAA with probe detection                          | LOINC |
| 723478 | SARS-CoV-2 (COVID19) ORF1ab region [Presence] in Respiratory specimen by NAA with probe detection                                   | LOINC |

|        |                                                                                                          |       |
|--------|----------------------------------------------------------------------------------------------------------|-------|
| 723464 | SARS-CoV-2 (COVID19) ORF1ab region [Presence] in Unspecified specimen by NAA with probe detection        | LOINC |
| 723471 | SARS-CoV-2 (COVID19) RdRp gene [Cycle Threshold #] in Respiratory specimen by NAA with probe detection   | LOINC |
| 723470 | SARS-CoV-2 (COVID19) RdRp gene [Cycle Threshold #] in Unspecified specimen by NAA with probe detection   | LOINC |
| 706160 | SARS-CoV-2 (COVID19) RdRp gene [Presence] in Respiratory specimen by NAA with probe detection            | LOINC |
| 706173 | SARS-CoV-2 (COVID19) RdRp gene [Presence] in Unspecified specimen by NAA with probe detection            | LOINC |
| 586528 | SARS-CoV-2 (COVID19) RNA [Cycle Threshold #] in Respiratory specimen by NAA with probe detection         | LOINC |
| 586529 | SARS-CoV-2 (COVID19) RNA [Cycle Threshold #] in Unspecified specimen by NAA with probe detection         | LOINC |
| 715262 | SARS-CoV-2 (COVID19) RNA [Log #/volume] (viral load) in Unspecified specimen by NAA with probe detection | LOINC |
| 723476 | SARS-CoV-2 (COVID19) RNA [Presence] in Nasopharynx by NAA with non-probe detection                       | LOINC |
| 586526 | SARS-CoV-2 (COVID19) RNA [Presence] in Nasopharynx by NAA with probe detection                           | LOINC |
| 757677 | SARS-CoV-2 (COVID19) RNA [Presence] in Nose by NAA with probe detection                                  | LOINC |
| 706163 | SARS-CoV-2 (COVID19) RNA [Presence] in Respiratory specimen by NAA with probe detection                  | LOINC |
| 715260 | SARS-CoV-2 (COVID19) RNA [Presence] in Saliva (oral fluid) by NAA with probe detection                   | LOINC |
| 715261 | SARS-CoV-2 (COVID19) RNA [Presence] in Saliva (oral fluid) by Sequencing                                 | LOINC |
| 723463 | SARS-CoV-2 (COVID19) RNA [Presence] in Serum or Plasma by NAA with probe detection                       | LOINC |
| 706170 | SARS-CoV-2 (COVID19) RNA [Presence] in Unspecified specimen by NAA with probe detection                  | LOINC |
| 706158 | SARS-CoV-2 (COVID19) RNA panel - Respiratory specimen by NAA with probe detection                        | LOINC |
| 706169 | SARS-CoV-2 (COVID19) RNA panel - Unspecified specimen by NAA with probe detection                        | LOINC |
| 723467 | SARS-CoV-2 (COVID19) S gene [Cycle Threshold #] in Respiratory specimen by NAA with probe detection      | LOINC |
| 723468 | SARS-CoV-2 (COVID19) S gene [Cycle Threshold #] in Unspecified specimen by NAA with probe detection      | LOINC |

|          |                                                                                            |       |
|----------|--------------------------------------------------------------------------------------------|-------|
| 723465   | SARS-CoV-2 (COVID19) S gene [Presence] in Respiratory specimen by NAA with probe detection | LOINC |
| 586519   | SARS-CoV-2 (COVID19) S gene [Presence] in Serum or Plasma by NAA with probe detection      | LOINC |
| 723466   | SARS-CoV-2 (COVID19) S gene [Presence] in Unspecified specimen by NAA with probe detection | LOINC |
| 586517   | SARS-CoV-2 (COVID19) whole genome [Nucleotide sequence] in Isolate by Sequencing           | LOINC |
| 40218805 | Testing for SARS-CoV-2 in CDC laboratory                                                   | HCPCS |
| 40218804 | Testing for SARS-CoV-2 in non-CDC laboratory                                               | HCPCS |

### Supporting Table 3. Definitions and codes used for hypertension and other comorbidities

| Name                         | Included Codes                                                                                              |
|------------------------------|-------------------------------------------------------------------------------------------------------------|
| Hyperlipidemia               | <a href="https://atlas.ohdsi.org/#/concept/432867">https://atlas.ohdsi.org/#/concept/432867</a>             |
| Chronic kidney disease       | <a href="https://atlas.ohdsi.org/#/cohortdefinition/312">https://atlas.ohdsi.org/#/cohortdefinition/312</a> |
| Cancer                       | <a href="https://atlas.ohdsi.org/#/cohortdefinition/222">https://atlas.ohdsi.org/#/cohortdefinition/222</a> |
| Asthma                       | <a href="https://atlas.ohdsi.org/#/cohortdefinition/218">https://atlas.ohdsi.org/#/cohortdefinition/218</a> |
| Dementia                     | <a href="https://atlas.ohdsi.org/#/cohortdefinition/226">https://atlas.ohdsi.org/#/cohortdefinition/226</a> |
| Total cardiovascular disease | <a href="https://atlas.ohdsi.org/#/cohortdefinition/246">https://atlas.ohdsi.org/#/cohortdefinition/246</a> |
| Peripheral vascular disease  | <a href="https://atlas.ohdsi.org/#/concept/321052">https://atlas.ohdsi.org/#/concept/321052</a>             |

|                                       |                                                                                                             |
|---------------------------------------|-------------------------------------------------------------------------------------------------------------|
| Cerebrovascular disease               | <a href="https://atlas.ohdsi.org/#/concept/381591">https://atlas.ohdsi.org/#/concept/381591</a>             |
| Chronic liver disease                 | <a href="https://atlas.ohdsi.org/#/concept/4212540">https://atlas.ohdsi.org/#/concept/4212540</a>           |
| Chronic obstructive pulmonary disease | <a href="https://atlas.ohdsi.org/#/cohortdefinition/219">https://atlas.ohdsi.org/#/cohortdefinition/219</a> |
| Heart disease                         | <a href="https://atlas.ohdsi.org/#/cohortdefinition/231">https://atlas.ohdsi.org/#/cohortdefinition/231</a> |
| Hypertension                          | <a href="https://atlas.ohdsi.org/#/cohortdefinition/227">https://atlas.ohdsi.org/#/cohortdefinition/227</a> |
| Obesity                               | <a href="https://atlas.ohdsi.org/#/cohortdefinition/224">https://atlas.ohdsi.org/#/cohortdefinition/224</a> |
| Type 2 Diabetes Mellitus              | <a href="https://atlas.ohdsi.org/#/cohortdefinition/311">https://atlas.ohdsi.org/#/cohortdefinition/311</a> |

**Supporting Table 4. Prevalence of hypertension among COVID-19 patients in the diagnosed and hospitalised cohorts in the CHARYBDIS Network.**

|                     | Diagnosed with COVID-19 |                  | Hospitalized with COVID-19 |                  |
|---------------------|-------------------------|------------------|----------------------------|------------------|
|                     | N of prevalent cases    | % (95% CI)       | N of prevalent cases       | % (95% CI)       |
| IQVIA-OpenClaims-US | 1,245,436               | 48.3 (48.2-48.4) | 384,508                    | 76.5 (76.3-76.6) |
| OPTUM-EHR-US        | 66,432                  | 37.4 (37.2-37.7) | 18,242                     | 64.1 (63.5-64.6) |
| VA-OMOP-US          | 34,093                  | 61.4 (61.0-61.8) | 8,996                      | 85.9 (85.2-86.6) |



|                      |        |                  |       |                  |
|----------------------|--------|------------------|-------|------------------|
| HEALTHVERITY-US      | 25,405 | 22.3 (22.0-22.5) | 4,512 | 59.5 (58.4-60.6) |
| SIDIAP-Spain         | 21,289 | 17.4 (17.2-17.6) | 5,636 | 31.0 (30.3-31.6) |
| CUIMC-US             | 3,672  | 43.1 (42.1-44.2) | 1,708 | 65.7 (63.9-67.5) |
| IQVIA-LPD-France     | 3,260  | 19.0 (18.4-19.6) | -     | -                |
| CU-AMC-HDC-US        | 2,461  | 33.9 (32.8-34.9) | 904   | 63.0 (60.5-65.5) |
| IQVIA-DA-Germany     | 2,418  | 30.3 (29.3-31.3) | -     | -                |
| HIRA-South Korea     | -      | -                | 1943  | 25.6 (24.6-26.6) |
| IQVIA-LPD-Italy      | 1,618  | 36.1 (34.6-37.5) | -     | -                |
| STARR-OMOP-US        | 1,246  | 37.4 (35.8-39.1) | 342   | 55.6 (51.7-59.5) |
| HMAR-Spain           | -      | -                | 594   | 29.5 (27.5-31.5) |
| CPRD-UK              | 756    | 22.4 (21.0-23.8) | -     | -                |
| IPCI-The Netherlands | 676    | 22.2 (20.7-23.7) | -     | -                |

# BMJ Open

## Characteristics and outcomes of COVID-19 patients with and without prevalent hypertension: a multinational cohort study

|                               |                                                                                                                                                                                                                                                                                                                                                                                                                                                                                                                                                                                                                                                                                                                                                                                                                                                                                                                                                                                                                                                                                                                                                                                                                                                                                                                                                                                                                                                                                                                                                                                                                                                                                                                                                                                                                                                                                                                                                                                                                                                                                                                                                                                                                                                  |
|-------------------------------|--------------------------------------------------------------------------------------------------------------------------------------------------------------------------------------------------------------------------------------------------------------------------------------------------------------------------------------------------------------------------------------------------------------------------------------------------------------------------------------------------------------------------------------------------------------------------------------------------------------------------------------------------------------------------------------------------------------------------------------------------------------------------------------------------------------------------------------------------------------------------------------------------------------------------------------------------------------------------------------------------------------------------------------------------------------------------------------------------------------------------------------------------------------------------------------------------------------------------------------------------------------------------------------------------------------------------------------------------------------------------------------------------------------------------------------------------------------------------------------------------------------------------------------------------------------------------------------------------------------------------------------------------------------------------------------------------------------------------------------------------------------------------------------------------------------------------------------------------------------------------------------------------------------------------------------------------------------------------------------------------------------------------------------------------------------------------------------------------------------------------------------------------------------------------------------------------------------------------------------------------|
| Journal:                      | <i>BMJ Open</i>                                                                                                                                                                                                                                                                                                                                                                                                                                                                                                                                                                                                                                                                                                                                                                                                                                                                                                                                                                                                                                                                                                                                                                                                                                                                                                                                                                                                                                                                                                                                                                                                                                                                                                                                                                                                                                                                                                                                                                                                                                                                                                                                                                                                                                  |
| Manuscript ID                 | bmjopen-2021-057632.R1                                                                                                                                                                                                                                                                                                                                                                                                                                                                                                                                                                                                                                                                                                                                                                                                                                                                                                                                                                                                                                                                                                                                                                                                                                                                                                                                                                                                                                                                                                                                                                                                                                                                                                                                                                                                                                                                                                                                                                                                                                                                                                                                                                                                                           |
| Article Type:                 | Original research                                                                                                                                                                                                                                                                                                                                                                                                                                                                                                                                                                                                                                                                                                                                                                                                                                                                                                                                                                                                                                                                                                                                                                                                                                                                                                                                                                                                                                                                                                                                                                                                                                                                                                                                                                                                                                                                                                                                                                                                                                                                                                                                                                                                                                |
| Date Submitted by the Author: | 08-Nov-2021                                                                                                                                                                                                                                                                                                                                                                                                                                                                                                                                                                                                                                                                                                                                                                                                                                                                                                                                                                                                                                                                                                                                                                                                                                                                                                                                                                                                                                                                                                                                                                                                                                                                                                                                                                                                                                                                                                                                                                                                                                                                                                                                                                                                                                      |
| Complete List of Authors:     | <p>Reyes, Carlen; GREMPAL Research Group, Fundació Institut Universitari per a la recerca a l'Atenció Primària de Salut Jordi Gol i Gurina (IDIAPJGol), and CIBERFes, Universitat Autònoma de Barcelona and Instituto de Salud Carlos III,</p> <p>Pistillo, Andrea ; Fundació Institut Universitari per a la recerca a l'Atenció Primària de Salut Jordi Gol i Gurina (IDIAPJGol),</p> <p>Fernández-Bertolín, Sergio; Fundació Institut Universitari per a la recerca a l'Atenció Primària de Salut Jordi Gol i Gurina (IDIAPJGol),</p> <p>Recalde, Martina; IDIAP Jordi Gol</p> <p>Roel, Elena; IDIAP Jordi Gol</p> <p>Puente, Diana; IDIAP Jordi Gol, Research</p> <p>Sena, Anthony; Janssen Research and Development Titusville</p> <p>Blacketer, Clair; Janssen Research and Development Titusville</p> <p>Lai, Lana; The University of Manchester, School of Medical Sciences</p> <p>Alshammari, Thamir; King Saud University, Medication Safety Research Chair; Saudi Food and Drug Authority,</p> <p>Ahmed, Waheed-UI-Rahman; University of Oxford Nuffield Department of Orthopaedics Rheumatology and Musculoskeletal Sciences</p> <p>Alser, Osaid ; Harvard Medical School, Trauma, Emergency Surgery and Surgical Critical Care</p> <p>Alghoul, Heba; Islamic University of Gaza Faculty of Medicine,</p> <p>Areia, Carlos; University of Oxford, Nuffield Department of Clinical Neurosciences</p> <p>Dawoud, Dalia; National Institute for Health and Care Excellence,</p> <p>Prats-Urbe, Albert; University of Oxford, Nuffield Department of Orthopaedics Rheumatology and Musculoskeletal Science</p> <p>Valveny, Neus; TFS health science</p> <p>de Maeztu, Gabriel; IOMED</p> <p>Sorlí Redó, Luisa; Universitat Autònoma de Barcelona</p> <p>Martinez Roldan, Jordi; Hospital del Mar</p> <p>Lopez Montesinos, Inmaculada; IMIM</p> <p>Schilling, Lisa; University of Colorado - Anschutz Medical Campus</p> <p>Golozar, Asieh; Johns Hopkins University Bloomberg School of Public Health</p> <p>Reich, Christian; IQVIA</p> <p>Posada, Jose; Stanford University School of Medicine</p> <p>Shah, Nigam ; Stanford University,</p> <p>You, Seng; Yonsei University College of Medicine, Department of Preventive Medicine</p> |

|                                 |                                                                                                                                                                                                                                                                                                                                                                                                                                                                                                                                                                                                                                                                                                                                                                                                                                                                                                                                                                                                                                |
|---------------------------------|--------------------------------------------------------------------------------------------------------------------------------------------------------------------------------------------------------------------------------------------------------------------------------------------------------------------------------------------------------------------------------------------------------------------------------------------------------------------------------------------------------------------------------------------------------------------------------------------------------------------------------------------------------------------------------------------------------------------------------------------------------------------------------------------------------------------------------------------------------------------------------------------------------------------------------------------------------------------------------------------------------------------------------|
|                                 | Lynch, Kristine; Department of Veterans Affairs; The University of Utah School of Medicine<br>DuVall, Scott; Department of Veterans Affairs; The University of Utah School of Medicine<br>Matheny, Michael; VA Tennessee Valley Healthcare System, GRECC; Vanderbilt University Medical Center, Department of Biomedical Informatics<br>Nyberg, Fredrik; University of Gothenburg Sahlgrenska Academy, School of Public Health and Community Medicine, Institute of Medicine, Institute of Medicine<br>Ostropolets, Anna; Columbia University Irving Medical Center<br>Hripcsak, George; Columbia University Irving Medical Center<br>Rijnbeek, P; Erasmus Medical Center, Rotterdam<br>Suchard, MA; University of California Los Angeles,<br>Ryan, Patrick; Janssen Research and Development LLC, Observational Health Data Analytics; Columbia University Irving Medical Center, Department of Biomedical Informatics<br>Kostka, Kristin; IQVIA<br>Duarte-Salles, Talita; Institut de Recerca en Atencio Primaria Jordi Gol, |
| <b>Primary Subject Heading</b>: | Epidemiology                                                                                                                                                                                                                                                                                                                                                                                                                                                                                                                                                                                                                                                                                                                                                                                                                                                                                                                                                                                                                   |
| Secondary Subject Heading:      | General practice / Family practice                                                                                                                                                                                                                                                                                                                                                                                                                                                                                                                                                                                                                                                                                                                                                                                                                                                                                                                                                                                             |
| Keywords:                       | COVID-19, EPIDEMIOLOGY, Hypertension < CARDIOLOGY                                                                                                                                                                                                                                                                                                                                                                                                                                                                                                                                                                                                                                                                                                                                                                                                                                                                                                                                                                              |
|                                 |                                                                                                                                                                                                                                                                                                                                                                                                                                                                                                                                                                                                                                                                                                                                                                                                                                                                                                                                                                                                                                |

SCHOLARONE™  
Manuscripts



I, the Submitting Author has the right to grant and does grant on behalf of all authors of the Work (as defined in the below author licence), an exclusive licence and/or a non-exclusive licence for contributions from authors who are: i) UK Crown employees; ii) where BMJ has agreed a CC-BY licence shall apply, and/or iii) in accordance with the terms applicable for US Federal Government officers or employees acting as part of their official duties; on a worldwide, perpetual, irrevocable, royalty-free basis to BMJ Publishing Group Ltd ("BMJ") its licensees and where the relevant Journal is co-owned by BMJ to the co-owners of the Journal, to publish the Work in this journal and any other BMJ products and to exploit all rights, as set out in our [licence](#).

The Submitting Author accepts and understands that any supply made under these terms is made by BMJ to the Submitting Author unless you are acting as an employee on behalf of your employer or a postgraduate student of an affiliated institution which is paying any applicable article publishing charge ("APC") for Open Access articles. Where the Submitting Author wishes to make the Work available on an Open Access basis (and intends to pay the relevant APC), the terms of reuse of such Open Access shall be governed by a Creative Commons licence – details of these licences and which [Creative Commons](#) licence will apply to this Work are set out in our licence referred to above.

Other than as permitted in any relevant BMJ Author's Self Archiving Policies, I confirm this Work has not been accepted for publication elsewhere, is not being considered for publication elsewhere and does not duplicate material already published. I confirm all authors consent to publication of this Work and authorise the granting of this licence.

1  
2  
3 1 Characteristics and outcomes of COVID-19 patients with and without prevalent  
4  
5 2 hypertension: a multinational cohort study  
6  
7 3  
8  
9

10 4 Carlen Reyes<sup>1</sup>, Andrea Pistillo<sup>1</sup>, Sergio Fernández-Bertolín<sup>1</sup>, Martina Recalde<sup>1,2</sup>, Elena  
11  
12 5 Roel<sup>1,2</sup>, Diana Puente<sup>1,2</sup>, Anthony G. Sena<sup>3,4</sup>, Clair Blacketer<sup>3,4</sup>, Lana Lai<sup>5</sup>, Thamir M  
13  
14 6 Alshammari<sup>6</sup>, Waheed-UI-Rahman Ahmed<sup>7,8</sup>, Osaid Alser<sup>9</sup>, Heba Alghoul<sup>10</sup>, Carlos Areia<sup>11</sup>,  
15  
16 7 Dalia Dawoud<sup>12,13</sup>, Albert Prats-Urbe<sup>14</sup>, Neus Valveny<sup>15</sup>, Gabriel de Maeztu<sup>16</sup>, Luisa Sorlí  
17  
18 8 Redó<sup>2,17,18</sup>, Jordi Martínez Roldán<sup>19</sup>, Inmaculada López Montesinos<sup>17</sup>, Lisa M Schilling<sup>20</sup>,  
19  
20 9 Asieh Golozar<sup>21,22</sup>, Christian Reich<sup>23</sup>, Jose D. Posada<sup>24</sup>, Nigam H. Shah<sup>24</sup>, Seng Chan You<sup>25</sup>,  
21  
22 10 Kristine E. Lynch<sup>26,27</sup>, Scott L. DuVall<sup>26,27</sup>, Michael E. Matheny<sup>26,27</sup>, Fredrik Nyberg<sup>28</sup>, Anna  
23  
24 11 Ostropolets<sup>29</sup>, George Hripcsak<sup>30,31</sup>, Peter R. Rijnbeek<sup>32</sup>, Mark A. Suchard<sup>33</sup>, Patrick Ryan<sup>3,30</sup>,  
25  
26 12 Kristin Kostka<sup>23,34</sup>, Talita Duarte-Salles<sup>1\*</sup>  
27  
28  
29  
30  
31  
32

33 14 Affiliations:

- 34  
35 15 1- Fundació Institut Universitari per a la recerca a l'Atenció Primària de Salut Jordi Gol i  
36  
37 16 Gurina (IDIAPJGol), Barcelona, Spain.  
38  
39  
40 17 2- Universitat Autònoma de Barcelona, Spain  
41  
42  
43 18 3- Janssen Research & Development, Titusville, NJ, USA  
44  
45  
46 19 4- Department of Medical Informatics, Erasmus University Medical Center, Rotterdam, The  
47  
48 20 Netherlands  
49  
50  
51 21 5- School of Medical Sciences, University of Manchester, UK  
52  
53  
54 22 6- College of Pharmacy, Riyadh Elm University Riyadh, Saudi  
55  
56  
57 23 7- Nuffield Department of Orthopaedics, Rheumatology, and Musculoskeletal Sciences,  
58  
59 24 University of Oxford, Botnar Research Centre, Windmill Road, Oxford, UK.  
60

- 1
- 2
- 3 25 8- College of Medicine and Health, University of Exeter, St Luke's Campus, Heavitree
- 4
- 5 26 Road, Exeter, UK
- 6
- 7
- 8 27 9- Massachusetts General Hospital, Harvard Medical School, USA
- 9
- 10 28 10- Faculty of Medicine, Islamic University of Gaza, Palestine
- 11
- 12 29 11- Nuffield Department of Clinical Neurosciences, University of Oxford, Oxford, UK
- 13
- 14 30 12- National Institute for Health and Care Excellence (NICE), London, UK
- 15
- 16
- 17 31 13- Cairo University, Faculty of Pharmacy, Cairo, Egypt
- 18
- 19 32 14- Centre for Statistics in Medicine, NDORMS, University of Oxford, Botnar Research
- 20
- 21 33 Centre, Nuffield Orthopaedic Centre, Windmill Road, Oxford, UK
- 22
- 23
- 24 34 15- Real-World Evidence, TFS, Barcelona, Spain
- 25
- 26 35 16- IOMED, Barcelona, Spain
- 27
- 28 36 17- Department of Infectious Diseases, Hospital del Mar, Institut Hospital del Mar
- 29
- 30 37 d'Investigació Mèdica (IMIM), Barcelona, Spain
- 31
- 32
- 33 38 18- Universitat Pompeu Fabra, Barcelona, Spain
- 34
- 35 39 19- Director of Innovation and Digital Transformation, Hospital del Mar, Barcelona, Spain
- 36
- 37 40 20- University of Colorado Anschutz Medical Campus, Aurora, CO, USA
- 38
- 39
- 40 41 21- Regeneron Pharmaceuticals, Tarrytown, NY, USA
- 41
- 42 42 22- Johns Hopkins Bloomberg School of Public health, NY, USA
- 43
- 44 43 23- Real-World Solutions, IQVIA, Cambridge, MA, USA
- 45
- 46 44 24- Stanford University School of Medicine, Stanford, CA, USA
- 47
- 48 45 25- Department of Preventive Medicine, Yonsei University College of Medicine, Seoul,
- 49
- 50 46 Korea
- 51
- 52 47 26- VA Informatics and Computing Infrastructure, VA Salt Lake City Health Care System,
- 53
- 54 48 Salt Lake City, UT, USA
- 55
- 56
- 57
- 58
- 59
- 60

- 1  
2  
3 49 27- Department of Internal Medicine, University of Utah School of Medicine, Salt Lake City,  
4  
5 50 UT, USA  
6  
7  
8 51 28- School of Public Health and Community Medicine, Institute of Medicine, Sahlgrenska  
9  
10 52 Academy, University of Gothenburg, Gothenburg, Sweden  
11  
12 53 29- Columbia University Irving Medical Center, New York, USA  
13  
14 54 30- Department of Biomedical Informatics, Columbia University Irving Medical Center, New  
15  
16 55 York, NY, USA  
17  
18 56 31- Medical Informatics Services, NewYork-Presbyterian Hospital, New York, NY, USA  
19  
20 57 32- Department of Medical Informatics Erasmus University Medical Center, Rotterdam, The  
21  
22 58 Netherlands  
23  
24 59 33- Department of Biostatistics, Fielding School of Public Health, University of California,  
25  
26 60 Los Angeles, USA  
27  
28 61 34- The OHDSI Center at the Roux Institute, Northeastern University, Portland, ME, USA  
29  
30  
31  
32  
33  
34

35 63 \*Corresponding author:

36  
37 64 Talita Duarte-Salles

38  
39 65 Fundació Institut Universitari per la recerca a L'Atenció Primària de Salut Jordi Gol I Gurina

40  
41 66 (IDIAPJGol)

42  
43 67 Gran Via Corts Catalanes, 587, àtic

44  
45 68 08007 Barcelona-Spain

46  
47 69 Tel: +34-93 4824342

48  
49 70 Email: [tduarte@idiapjgol.org](mailto:tduarte@idiapjgol.org)

50  
51 71

52  
53 72

54  
55 73

1  
2  
3 74 **ABSTRACT**  
4

5 75 **Objective:** To characterize patients with and without prevalent hypertension and COVID-19,  
6  
7  
8 76 and to assess their adverse outcomes in both in and outpatients.  
9

10 77 **Design and setting:** Retrospective cohort study using 15 healthcare databases (primary and  
11  
12 78 secondary electronic health care records, insurance and national claims data) from the US,  
13  
14  
15 79 Europe and South Korea, standardized to the Observation Medical Outcomes Partnership  
16  
17 80 common data model. Data was gathered from 1<sup>st</sup> March to 31<sup>st</sup> October 2020.  
18  
19

20 81 **Participants:** Two non-mutually exclusive cohorts were defined: 1) individuals *diagnosed*  
21  
22 82 with COVID-19 (*diagnosed cohort*) and 2) individuals *hospitalized* with COVID-19  
23  
24 83 (*hospitalized cohort*) and stratified by hypertension status. Follow-up was from COVID-19  
25  
26 84 diagnosis/hospitalization to death, end of the study period, or 30-days.  
27  
28  
29

30 85 **Outcomes:** Demographics, comorbidities, and 30-day outcomes (hospitalization and death  
31  
32 86 for the *diagnosed cohort* and adverse events and death for the *hospitalized cohort*) were  
33  
34 87 reported.  
35  
36  
37

38 88 **Results:** We identified 2,851,035 *diagnosed* and 563,708 *hospitalized* patients with COVID-  
39  
40 89 19. Hypertension was more prevalent in the latter (range (%), 95%CI) across databases 17.4  
41  
42 90 (17.2-17.6)- 61.4 (61.0-61.8) and 25.6 (24.6-26.6)-85.9 (85.2-86.6). Patients in both cohorts  
43  
44 91 with hypertension were predominantly >50-year-old and female. Patients with hypertension  
45  
46 92 were frequently diagnosed with obesity, heart disease, dyslipidaemia, and diabetes.  
47  
48 93 Compared to patients without hypertension, patients with hypertension, in the COVID-19  
49  
50 94 *diagnosed cohort*, had more hospitalizations (range 1.3 (0.4-2.2)- 41.1 (39.5-42.7) vs 1.4  
51  
52 95 (0.9-1.9)-15.9 (14.9-16.9)) and mortality (0.3(0.1-0.5)-18.5 (15.7-21.3) vs 0.2 (0.2-0.2)-11.8  
53  
54 96 (10.8-12.8)). Patients in the COVID-19 *hospitalized cohort* with hypertension were more  
55  
56  
57  
58  
59  
60



1  
2  
3 97 likely to have acute respiratory distress syndrome (0.1(0.0-0.2) -65.6 (62.5-68.7) vs 0.1 (0.0-  
4  
5 98 0.2)-54.7 (50.5-58.9)), arrhythmia (0.5 (0.3-0.7)-45.8 (42.6-49.0) vs 0.4 (0.3-0.5)-36.8 (32.7-  
6  
7  
8 99 40.9)) and increased mortality (1.8 (0.4-3.2)-25.1 (23.0-27.2) vs 0.7 (0.5-0.9)-10.9 (10.4-  
9  
10  
11 100 11.4)) than patients without hypertension.

12  
13 101 **Conclusions:** COVID-19 patients with hypertension were more likely to suffer severe  
14  
15  
16 102 outcomes, hospitalizations and deaths compared to those without hypertension.

17  
18 103 **KEY WORDS:** COVID-19, Epidemiology, Hypertension

19  
20 104 **WORD COUNT:** 3,014

21  
22  
23 105 **ARTICLE SUMMARY**

24  
25 106 **Strengths and limitations of this study**

- 26  
27  
28 107 1- This study is unique in its approach to characterizing COVID-19 cases across an  
29  
30 108 international network of healthcare databases, with diverse healthcare systems and  
31  
32 109 policies, through a comprehensive federated approach.
- 33  
34 110 2- This study was carried out using routinely collected clinical practice data, which  
35  
36 111 confers a great external validity, but also implies a risk of misclassification.
- 37  
38 112 3- This study was intentionally descriptive and was deliberately not designed for causal  
39  
40 113 inference.
- 41  
42 114 4- The diagnosed and/or hospitalized cohorts were non-mutually exclusive.
- 43  
44 115 5- The data that underpinned this study mostly came from the initial months of the  
45  
46 116 COVID-19 pandemic and may not be representative of the COVID-19 cases  
47  
48 117 diagnosed and/or hospitalized during subsequent periods.
- 49  
50  
51  
52  
53  
54  
55  
56  
57  
58  
59  
60

## 119 INTRODUCTION

120 As of September 2021, the ongoing pandemic of the coronavirus disease 2019 (COVID-19)  
121 has affected over 220 million people and the estimated death toll surpasses the 4,5 million  
122 deaths worldwide<sup>1</sup>. Hypertension is a common chronic condition that may increase the risk of  
123 hospitalizations and adverse outcomes<sup>2</sup>. A higher prevalence of hypertension has been found  
124 among COVID-19 patients compared to the general population, which has attracted the  
125 attention of researchers<sup>3</sup>. The characterization of this population at risk is key to be able to  
126 design effective preventive strategies that could, improve patient outcomes and reduce the  
127 pressure on healthcare systems.

128 To date, observational studies<sup>4-16</sup>, systematic reviews, and meta-analyses have reported an  
129 increased risk of progression to severe COVID-19 and increased mortality in patients with  
130 hypertension<sup>17-21</sup>. However, these studies, either only included hospitalized patients<sup>4-13,15-16</sup>,  
131 leading to a selection bias, or had a small sample size<sup>6-10,15</sup>, both of which limits the  
132 extrapolation of results.

133 Most patients with confirmed SARS-CoV-2 infection, experience mild or moderate  
134 symptoms (80%)<sup>22</sup> and are predominantly seen as outpatients, therefore a large  
135 characterization study including both inpatient and outpatients is needed.

136 This study aims to describe and compare the demographics, baseline comorbidities and 30-  
137 day outcomes of individuals with COVID-19 and with and without pre-existing hypertension,  
138 in both in and outpatients.

## 139 MATERIAL AND METHODS

### 140 Study design, setting, and data sources

141 A multinational, multi-data base cohort study was conducted using data from 1<sup>st</sup> March to the  
142 31<sup>st</sup> October 2020 included in “The Characterizing Health Associated Risks and Your

1  
2  
3 143 Baseline Disease In SARS-COV-2” (CHARYBDIS <sup>23</sup>) study. This is a large-scale  
4  
5 144 multinational cohort study aimed to characterize health-associated risks and baseline diseases  
6  
7 145 in SARS-COV-2 patients using routinely collected primary care and hospital electronic  
8  
9 146 health records (EHR), hospital billing, and insurance claims data from the United States  
10  
11 147 (US), Europe (the Netherlands, Spain, the United Kingdom (UK), Germany, and France) and  
12  
13 148 Asia (South Korea and China).

14  
15  
16  
17 149 From the databases contributing to CHARYBDIS, only twenty had available information on  
18  
19 150 pre-existing hypertension and were initially selected. To be included in the study, databases  
20  
21 151 had to: 1. have at least 140 subjects with prevalent hypertension diagnosed with COVID-19  
22  
23 152 (necessary to estimate the prevalence of previous conditions or 30-day outcomes with  
24  
25 153 sufficient precision (confidence interval width of  $\pm 5\%$ )) and 2. have at least one year of  
26  
27 154 previous data before the date of COVID-19 diagnosis or hospitalization. Data results for this  
28  
29 155 paper were extracted on the 21st of January 2021 <sup>23</sup>. Fifteen databases complied with the  
30  
31 156 aforementioned inclusion criteria. Of these, five had data for outpatients (IQVIA-  
32  
33 157 Longitudinal Patients Database “LPD” (France), IQVIA-Longitudinal Patients Database  
34  
35 158 “LPD” (Italy), IQVIA-Disease Analyser “DA” (Germany), Clinical Practice Research  
36  
37 159 Datalink “CPRD” (UK), Integrated Primary Care Information “IPCI” (the Netherlands), two  
38  
39 160 had data for in-patients (Health Insurance Review & Assessment Service “HIRA” (South  
40  
41 161 Korea), Hospital del Mar “HMAR” (Spain)) and eight had both in and out-patient data  
42  
43 162 (IQVIA-OpenClaims, HEALTHVERITY, Information System for Research in Primary Care  
44  
45 163 “SIDIAP” (Spain <sup>24</sup>), Optum© de-identified Electronic health Record Dataset “OPTUM-  
46  
47 164 HER” (US), VA-OMOP, University of Colorado Anschutz Medical Campus Health Data  
48  
49 165 Compass “CUIMC” (US), CU-AMC-HDC, STANford Medicine Research Data Repository  
50  
51  
52  
53  
54  
55  
56  
57  
58  
59  
60

1  
2  
3 166 “STARR-OMOP” (US <sup>25</sup>). A more detailed description of the included data sources is  
4  
5 167 available in the Supporting Figure 1 and Table 1.  
6  
7

### 8 168 **Study participants and follow-up**

9  
10 169 Two non-mutually exclusive cohorts were defined: 1) individuals *diagnosed* with COVID-19  
11  
12 170 (COVID-19 *diagnosed*) and 2) individuals *hospitalized* with COVID-19 (COVID-19  
13  
14 171 *hospitalized*). COVID-19 *diagnosed* cohort included individuals with a COVID-19 clinical  
15  
16 172 diagnosis and/or a SARS-CoV-2 positive test. The COVID-19 *hospitalized* cohort included  
17  
18 173 patients hospitalized with a COVID-19 clinical diagnosis or positive test 21 days before  
19  
20 174 admission up to the end of their hospitalization. The codes used to identify COVID-19 cases  
21  
22 175 are described in more detail in Supporting Table 2. The index date (i.e. cohort start date) was  
23  
24 176 the date of COVID-19 diagnosis or positive test (whichever occurred first), for the diagnosed  
25  
26 177 cohort; and the date of hospitalization, for the hospitalized cohort. Cohort participants were  
27  
28 178 followed from the index date to the earliest of death, the end of the observation period, or 30  
29  
30 179 days after.  
31  
32  
33  
34

### 35 180 **Baseline characteristics and outcomes of interest**

36  
37 181 The hypertension diagnosis, as well as the participants’ sex and age, were gathered at the  
38  
39 182 index date and identified comorbidities in the year before the index date. Hypertension  
40  
41 183 diagnosis and comorbidities (asthma, cancer, chronic kidney and liver disease, chronic  
42  
43 184 obstructive pulmonary disease, dementia, heart disease, hyperlipidaemia, peripheral vascular  
44  
45 185 disease, type 2 diabetes mellitus, obesity) were ascertained based on the Systematized  
46  
47 186 Nomenclature of Medicine Current Terminology (SNOMED CT) hierarchy, with all  
48  
49 187 descendant codes included. We selected and included comorbidities based on their  
50  
51 188 prevalence in the cohorts of the participating sites and their clinical relevance to the COVID-  
52  
53 189 19 research field <sup>17-21</sup>. Clinical epidemiologists generated a list of codes for the identification  
54  
55 190 of prior medical conditions and outcomes of interest using a web-based integrated platform  
56  
57  
58  
59  
60

1  
2  
3 191 (ATLAS tool: <https://atlas.ohdsi.org/>). The definition of the variables can be found in  
4  
5 192 Supporting Table 3.  
6  
7  
8 193 Our main 30-day outcomes of interest were hospitalization and death for the COVID-19  
9  
10 194 *diagnosed* cohort, and requirement of intensive services (identified as any record of  
11  
12 195 mechanical ventilation and/or a tracheostomy and/or extracorporeal membrane oxygenation  
13  
14 196 procedure), acute respiratory distress syndrome (ARDS), arrhythmia, total cardiovascular  
15  
16 197 events (ischemic stroke, haemorrhagic stroke, heart failure (heart failure during  
17  
18 198 hospitalization for the hospitalized cohort), acute myocardial infarction or sudden cardiac  
19  
20 199 death), sepsis, venous thromboembolism (VTE) and death for the COVID-19 *hospitalized*  
21  
22 200 cohort.  
23

## 26 201 **Statistical analyses**

28 202 All data were standardized to the Observational Medical Outcomes Partnership (OMOP)  
29  
30 203 Common Data Model (CDM) <sup>26</sup>. A common analytical code for the CHARYBDIS study was  
31  
32 204 developed for the Observational Health Data Sciences and Informatics (OHDSI) Methods  
33  
34 205 Library which was run locally in each database. Only aggregate results from each database  
35  
36 206 were publicly shared. The CHARYBDIS protocol and source code can be found at  
37  
38 207 <https://github.com/ohdsi-studies/Covid19CharacterizationCharybdis>.  
39  
40  
41 208 Demographics (sex and age categorized in 5-year age bands), comorbidities and 30-day  
42  
43 209 incidence rates of outcomes were reported as proportions, along with 95% Confidence  
44  
45 210 Intervals (CI). A minimum of 5 individuals was established to minimize the risk of  
46  
47 211 identification of patients.  
48  
49  
50 212 All results are reported by cohort, database and by hypertension status (with or without  
51  
52 213 hypertension).  
53  
54  
55 214 This is a descriptive study and no causal inference is intended. Multivariable regression or  
56  
57 215 adjustment for confounding was therefore considered out of remit, and not included in our  
58  
59  
60

1  
2  
3 216 study. We used R version 4.0.3 for data visualization. Before performing these analyses, all  
4  
5 217 the data partners requested the Institutional Review Board (IRB) or equivalent governance  
6  
7 218 approval. The full ethics committees' statement is detailed in the ethics statement section. All  
8  
9 219 data partners consented to the external sharing of the result set on data.ohdsi.org. Consent to  
10  
11 220 participate was not required as only anonymised retrospective data was used for this study  
12  
13  
14 221 and no patient or GP contact was required.

## 17 222 **Patient and Public Involvement**

18  
19 223 No patient involved

## 21 224 **RESULTS**

### 23 225 **Study population**

24  
25 226 Overall, 2,851,035 patients diagnosed and 563,708 patients hospitalized with COVID-19  
26  
27 227 were identified in 15 databases from 8 countries (the US, South Korea, Germany, the  
28  
29 228 Netherlands, France, Italy, Spain, and the UK). In total, 1,408,762 and 427,385 patients  
30  
31 229 diagnosed and hospitalized with COVID-19, respectively, had a prior diagnosis of  
32  
33 230 hypertension (Supporting Table 4). The prevalence of hypertension ranged from 17.4% to  
34  
35 231 48.3% in the COVID-19 *diagnosed* cohort, and from 25.6% to 85.9% in the COVID-19  
36  
37 232 *hospitalized cohort*.

### 40 233 **Baseline characteristics**

41  
42 234 The age and sex distribution in the COVID-19 *diagnosed cohort* and in the COVID-19  
43  
44 235 *hospitalized cohort*, with and without hypertension are represented in Figures 1 and 2  
45  
46 236 respectively. Overall, in both cohorts, patients with hypertension were older than those  
47  
48 237 without (higher proportion of patients aged above 50 across all databases). The proportion of  
49  
50 238 patients *diagnosed* with COVID-19 and hypertension peaked at a younger age (55 to 70 years  
51  
52 239 old) compared to those *hospitalized* (70 to 80 years old). The proportion of women with  
53  
54  
55  
56  
57  
58  
59  
60

240 hypertension was greater in the *diagnosed* cohort (8.6 % to 55.6%) than in the *hospitalized*  
 241 cohort (4.5% to 56%).

### 242 **Baseline comorbidities**

243 Figures 3 and 4 reports the proportion of baseline comorbidities of the COVID-19 *diagnosed*  
 244 cohort (Figure 3) and COVID-19 *hospitalized* cohort (Figure 4), with and without  
 245 hypertension. Patients with hypertension and COVID-19 *diagnosed* or *hospitalized* were  
 246 frequently diagnosed with obesity, heart disease, dyslipidaemia, and type 2 diabetes, the  
 247 proportion of which, more than double the ones found among patients with COVID-19  
 248 without hypertension.

### 249 **30-day outcomes of interest**

250 Thirty-day outcomes in people with and without hypertension in both the COVID-19  
 251 *diagnosed* and/or *hospitalized* cohorts are reported in Tables 1 and 2.

252 Patients with hypertension *diagnosed* with COVID-19 were more likely to be hospitalized  
 253 (range 1.3% to 41.1% vs 1.4 to 15.9%) and had increased mortality (range 0.3% to 18.5% vs  
 254 0.2% to 11.8%) when compared to those without hypertension (Table 1).

**Table 1. Comparison of 30-day outcomes of interest between COVID-19 patients with and without hypertension (HTN), in the COVID-19 diagnosed cohorts in the CHARYBDIS Network, % (95%CI)**

| Database         | HTN  | N         | 30-day outcomes |                  |
|------------------|------|-----------|-----------------|------------------|
|                  |      |           | Death           | Hospitalization  |
| IQVIA-OpenClaims | With | 1,245,436 | -               | 29.6 (29.5-29.7) |

|                       |         |           |                  |                  |
|-----------------------|---------|-----------|------------------|------------------|
| (US)                  |         |           |                  |                  |
|                       | Without | 1,333,227 | -                | 8.9 (8.9-8.9)    |
| OPTUM-HER (US)        | With    | 6,6432    | 1.7 (1.6-1.8)    | 26.4 (26.1-26.7) |
|                       | Without | 11,1033   | 0.2 (0.2-0.2)    | 9.2 (9.0-9.4)    |
| VA-OMOP (US)          | With    | 34,093    | 5.4 (5.2-5.6)    | 23.4 (23.0-23.8) |
|                       | Without | 21,464    | 0.7 (0.6-0.8)    | 6.1 (5.8-6.4)    |
| HEALTHVERITY<br>(US)  | With    | 25,405    | -                | 14.6 (14.2-15.0) |
|                       | Without | 88,768    | -                | 3.1 (3.0-3.2)    |
| SIDIAP (Spain)        | With    | 21,289    | 9.8 (9.4-10.2)   | 22.8 (22.2-23.4) |
|                       | Without | 100,852   | 3.3 (3.2-3.4)    | 11.2 (11.0-11.4) |
| CUIMC (US)            | With    | 3,672     | 11.8 (10.8-12.8) | 41.1 (39.5-42.7) |
|                       | Without | 4,847     | 2.0 (1.6-2.4)    | 15.9 (14.9-16.9) |
| CU-AMC-HDC (US)       | With    | 2,461     | 5.9 (5.0-6.8)    | 35.8 (33.9-37.7) |
|                       | Without | 4,809     | 0.7 (0.5-0.9)    | 11.2 (10.3-12.1) |
| IQVIA-DA<br>(Germany) | With    | 2,418     | 0.3 (0.1-0.5)    | -                |
|                       | Without | 5,553     | -                | -                |
| STARR-OMOP (US)       | With    | 1,246     | 0.6 (0.2-1.0)    | 24.6 (22.2-27.0) |
|                       | Without | 2,082     | -                | 14.0 (12.5-15.5) |
| CPRD (UK)             | With    | 756       | 18.5 (15.7-21.3) | -                |



|                                                                                                                                                    |         |       |                  |               |
|----------------------------------------------------------------------------------------------------------------------------------------------------|---------|-------|------------------|---------------|
|                                                                                                                                                    | Without | 2,616 | 11.8 (10.6-13.0) | -             |
| IPCI (The Netherlands)                                                                                                                             | With    | 676   | 13.6 (11.0-16.2) | 1.3 (0.4-2.2) |
|                                                                                                                                                    | Without | 2,371 | 3.1 (2.4-3.8)    | 1.4 (0.9-1.9) |
| Note: “-” means information is not available or <5 cases for all databases except for CU-AMC HDC where information is not available for <10 cases. |         |       |                  |               |

258

259 Patients with hypertension *hospitalized* with COVID-19 were more frequently diagnosed of  
 260 ARDS (range 0.1 to 65.6% vs 0.1 to 54.7%), cardiac arrhythmia (range 0.5 to 45.8% vs 0.4 to  
 261 36.8%), and had increased mortality (range 1.8 to 25.1% vs 0.7 to 10.9%) as compared to  
 262 those without hypertension (Table 2).

**Table 2. Comparison of 30-days outcomes of interest between COVID-19 patients with and without hypertension (HTN), in the COVID-19 hospitalized cohorts in the CHARYBDIS Network, % (95%CI)**

| Database              | HTN*    | N       | 30-day outcomes |                  |                    |                  |                  |                    |                  |
|-----------------------|---------|---------|-----------------|------------------|--------------------|------------------|------------------|--------------------|------------------|
|                       |         |         | VTE†            | Death            | Cardiac arrhythmia | Sepsis           | ARDS‡            | Intensive services | Total CVE§       |
| IQVIA-OpenClaims (US) | With    | 384,508 | 3.9 (3.8-4.0)   | -                | 15.4 (15.3-15.5)   | 18.3 (18.2-18.4) | 34.8 (34.6-35.0) | 9.1 (9.0-9.2)      | 11.3 (11.2-11.4) |
|                       | Without | 118,425 | 3.8 (3.7-3.9)   | -                | 7.2 (7.1-7.3)      | 15.5 (15.3-15.7) | 31.3 (31.0-31.6) | 6.4 (6.3-6.5)      | 4.5 (4.4-4.6)    |
| OPTUM-HER (US)        | With    | 18,242  | 6.2 (5.9-6.5)   | 5.1 (4.8-5.4)    | 31.6 (30.9-32.3)   | 24.8 (24.2-25.4) | 45.7 (45.0-46.4) | 14.0 (13.5-14.5)   | 18.2 (17.6-18.8) |
|                       | Without | 10,222  | 4.4 (4.0-4.8)   | 1.6 (1.4-1.8)    | 11.1 (10.5-11.7)   | 15.0 (14.3-15.7) | 27.5 (26.6-28.4) | 6.3 (5.8-6.8)      | 4.8 (4.4-5.2)    |
| VA-OMOP (US)          | With    | 8,996   | 7.3 (6.8-7.8)   | 15.4 (14.7-16.1) | 33.9 (32.9-34.9)   | 20.0 (19.2-20.8) | 43.9 (42.9-44.9) | 17.1 (16.3-17.9)   | 21.0 (20.2-21.8) |
|                       | Without | 1,475   | 6.9 (5.6-8.2)   | 7.6 (6.2-9.0)    | 16.8 (14.9-18.7)   | 16.2 (14.3-18.1) | 39.6 (37.1-42.1) | 11.2 (9.6-12.8)    | 7.3 (6.0-8.6)    |
| HEALTHVERITY (US)     | With    | 4,512   | 3.6 (3.1-4.1)   | -                | 14.8 (13.8-15.8)   | 16.5 (15.4-17.6) | 26.7 (25.4-28.0) | 6.1 (5.4-6.8)      | 11.9 (11.0-12.8) |
|                       | Without | 3,069   | 3.9 (3.2-4.6)   | -                | 6.8 (5.9-7.7)      | 12.5 (11.3-13.7) | 23.9 (22.4-25.4) | 4.9 (4.1-5.7)      | 5.6 (4.8-6.4)    |

|                                                                                                                                                    |         |        |                 |                  |                  |                  |                  |                  |                  |
|----------------------------------------------------------------------------------------------------------------------------------------------------|---------|--------|-----------------|------------------|------------------|------------------|------------------|------------------|------------------|
| SIDIAP (Spain)                                                                                                                                     | With    | 5,636  | 1.0 (0.7-1.3)   | 15.4 (14.5-16.3) | 0.5 (0.3-0.7)    | -                | 0.1 (0.0-0.2)    | -                | 0.9 (0.7-1.1)    |
|                                                                                                                                                    | Without | 12,566 | 1.1 (0.9-1.3)   | 10.9 (10.4-11.4) | 0.4 (0.3-0.5)    | 0.0 (0.0-0.0)    | 0.1 (0.0-0.2)    | -                | 0.5 (0.4-0.6)    |
| CUIMC (US)                                                                                                                                         | With    | 1,708  | 3.9 (3.0-4.8)   | 25.1 (23.0-27.2) | 12.1 (10.6-13.6) | 6.1 (5.0-7.2)    | 16.0 (14.3-17.7) | 2.2 (1.5-2.9)    | 8.1 (6.8-9.4)    |
|                                                                                                                                                    | Without | 892    | 3.6 (2.4-4.8)   | 10.2 (8.2-12.2)  | 4.7 (3.3-6.1)    | 5.3 (3.8-6.8)    | 17.8 (15.3-20.3) | 1.8 (0.9-2.7)    | 3.8 (2.5-5.1)    |
| CU-AMC HDC (US)                                                                                                                                    | With    | 904    | 11.4 (9.3-13.5) | 14.9 (12.6-17.2) | 45.8 (42.6-49.0) | 34.2 (31.1-37.3) | 65.6 (62.5-68.7) | 28.3 (25.4-31.2) | 19.8 (17.2-22.4) |
|                                                                                                                                                    | Without | 530    | 6.0 (4.0-8.0)   | 6.0 (4.0-8.0)    | 36.8 (32.7-40.9) | 27.4 (23.6-31.2) | 54.7 (50.5-58.9) | 15.5 (12.4-18.6) | 5.7 (3.7-7.7)    |
| HIRA (South Korea)                                                                                                                                 | With    | 1,943  | 0.7 (0.3-1.1)   | 7.7 (6.5-8.9)    | 4.4 (3.5-5.3)    | 5.3 (4.3-6.3)    | 2.6 (1.9-3.3)    | 4.9 (3.9-5.9)    | 10.0 (8.7-11.3)  |
|                                                                                                                                                    | Without | 5,656  | NC              | 0.7 (0.5-0.9)    | 0.7 (0.5-0.9)    | 3.1 (2.6-3.6)    | 0.5 (0.3-0.7)    | 0.6 (0.4-0.8)    | 4.7 (4.1-5.3)    |
| STARR-OMOP (US)                                                                                                                                    | With    | 342    | 2.0 (0.5-3.5)   | 1.8 (0.4-3.2)    | 22.2 (17.8-26.6) | 9.9 (6.7-13.1)   | 12.6 (9.1-16.1)  | 9.1 (6.1-12.1)   | 16.4 (12.5-20.3) |
|                                                                                                                                                    | Without | 273    | NC              | -                | 6.6 (3.7-9.5)    | 7.0 (4.0-10.0)   | 11.4 (7.6-15.2)  | 5.5 (2.8-8.2)    | -                |
| HMAR (Spain)                                                                                                                                       | With    | 594    | 3.2 (1.8-4.6)   | 14.3 (11.5-17.1) | 23.1 (19.7-26.5) | 1.9 (0.8-3.0)    | 12.6 (9.9-15.3)  | 13.5 (10.8-16.2) | 12.1 (9.5-14.7)  |
|                                                                                                                                                    | Without | 1,417  | 2.6 (1.8-3.4)   | 3.9 (2.9-4.9)    | 6.6 (5.3-7.9)    | 0.7 (0.3-1.1)    | 7.3 (5.9-8.7)    | 6.6 (5.3-7.9)    | 2.2 (1.4-3.0)    |
| Note: “-” means information is not available or <5 cases for all databases except for CU-AMC HDC where information is not available for <10 cases. |         |        |                 |                  |                  |                  |                  |                  |                  |

1  
2  
3 \* hypertension; †: Venous thromboembolic (pulmonary embolism and deep vein thrombosis) events; ‡: Acute respiratory distress syndrome; §: cardiovascular disease  
4 events (ischemic stroke, haemorrhagic stroke, heart failure (heart failure during hospitalization for the hospitalized cohort), acute myocardial infarction or sudden cardiac  
5 death)  
6  
7  
8  
9  
10  
11  
12  
13  
14  
15  
16  
17  
18  
19  
20  
21  
22  
23  
24  
25  
26  
27  
28  
29  
30  
31  
32  
33  
34  
35  
36  
37  
38  
39  
40  
41  
42  
43  
44  
45  
46

For peer review only

1  
2  
3 **264 DISCUSSION**  
4

5 265 This large multinational, multi-database cohort study, reports a greater prevalence of  
6  
7 266 hypertension among patients *hospitalized* with COVID-19 compared to those *diagnosed* with  
8  
9  
10 267 COVID-19. Patients with hypertension diagnosed and/or hospitalized with COVID-19 were  
11  
12 268 frequently diagnosed with obesity, heart disease, dyslipidaemia, and type 2 diabetes at  
13  
14 269 baseline, compared to those without hypertension. They were also more likely to experience  
15  
16 270 adverse outcomes including death and hospitalizations (in the COVID-19 *diagnosed cohort*)  
17  
18 271 and cardiac arrhythmia, ARDS and death (in the COVID-19 *hospitalized cohort*) than  
19  
20 272 patients without hypertension.  
21

22  
23 273 This is the first large multinational study that characterizes both in and out-patients with  
24  
25 274 COVID-19, with and without prevalent hypertension. Hypertension was more prevalent in  
26  
27 275 hospitalized patients compared to those diagnosed with COVID-19 (range from 25.6% to  
28  
29 276 85.9% vs 17.4 to 61.4% respectively). The observed variability between databases is similar  
30  
31 277 to previous reports, where prevalence's ranged from 28.8%<sup>7</sup> to 60%<sup>15</sup>.  
32

33 278 However, these results should be put into context given that our highest rate (in both COVID-  
34  
35 279 19 *diagnosed* and COVID-19 *hospitalized*) was observed in the VA-OMOP database from  
36  
37 280 the US Department of Veterans Affairs (mostly men of older age).  
38

39  
40 281 As in the general population with hypertension<sup>27</sup>, patients with hypertension diagnosed with  
41  
42 282 COVID-19 in this study were more frequently diagnosed with heart disease or type 2 diabetes  
43  
44 283 at baseline, than individuals without hypertension. These results are similar to what has been  
45  
46 284 previously published, where patients with hypertension and COVID-19 also reported a higher  
47  
48 285 prevalence of diabetes mellitus<sup>6,8,12</sup>, cardiovascular diseases (other than hypertension)<sup>8,12</sup>,  
49  
50 286 and chronic kidney disease<sup>8</sup> compared to those without hypertension. This study further  
51  
52 287 expands these previous findings identifying these same comorbidities in the out-patients  
53  
54  
55  
56  
57  
58  
59  
60

1  
2  
3 288 diagnosed with COVID-19 and adds obesity and dyslipidaemia to the list of conditions more  
4  
5  
6 289 frequently found among patients with COVID-19 and hypertension compared to those  
7  
8 290 without hypertension. The higher prevalence of comorbid conditions found in this study  
9  
10  
11 291 among patients with hypertension *hospitalized* with COVID-19 compared to patients with  
12  
13 292 hypertension *diagnosed* with COVID-19 suggests a poorer baseline health status.  
14  
15  
16 293 Patients with hypertension *hospitalized* with COVID-19 were more likely to have worse  
17  
18 294 disease progression with higher rates of ARDS (Prevalence per cent change (PC) between  
19  
20 295 patients with and without hypertension ranging from -1.8% to 18.2%), more cardiac  
21  
22 296 arrhythmia (PC ranging from 0.1% to 20.5%) and increased mortality (PC ranging from 3.5%  
23  
24 297 to 14.9%). Previous studies have documented poorer clinical outcomes in patients with  
25  
26 298 hypertension hospitalized with COVID-19 (including ARDS) <sup>8, 12, 14, 19</sup>, the need for  
27  
28 299 mechanical ventilation, admission to intensive care units <sup>6, 13, 19</sup> or an increased mortality <sup>4,7,11-</sup>  
29  
30 300 <sup>13, 19</sup>. This study further showed that patients with hypertension *diagnosed* with COVID-19  
31  
32 301 were more likely to experience hospitalizations (PC between patients with and without  
33  
34 302 hypertension ranging from -0.1% to 25.6%), and deaths (PC from 1.5% to 10.5%).  
35  
36  
37 303 These results highlight the importance of considering hypertension as a possible risk factor in  
38  
39 304 the overall population *diagnosed* and not only in those *hospitalized* with COVID-19. It also  
40  
41 305 adds to the current literature cardiac arrhythmia and cardiovascular diseases (other than  
42  
43 306 hypertension) to the list of adverse outcomes more frequently diagnosed among patients with  
44  
45 307 hypertension hospitalized with COVID-19 compared to those without hypertension.  
46  
47  
48 308 This study has several strengths. This is the largest cohort study on individuals with  
49  
50 309 hypertension who were *diagnosed* and/or *hospitalized* with COVID-19 to date. It provides  
51  
52 310 novel insight into the characterization of patients *diagnosed* with COVID-19 and confers a  
53  
54 311 greater external validity of its results compared to what has been published up to date (only  
55  
56 312 *hospitalized* patients). It is also unique in its approach to characterizing COVID-19 cases  
57  
58  
59  
60

1  
2  
3 313 across an international network of healthcare databases, with diverse healthcare systems and  
4  
5 314 policies, through a comprehensive federated approach, allowing the analysis of 15 databases  
6  
7  
8 315 without sharing patient identifiable data, hence respecting the patients' confidentiality at all  
9  
10 316 times.

11  
12 317 We recognize there are limitations to our approach. First, this study was intentionally  
13  
14 318 descriptive and was deliberately not designed for causal inference. The observed differences  
15  
16  
17 319 between groups (eg. with versus without hypertension) should therefore not be interpreted as  
18  
19 320 causal effects. Our patients were analysed depending on if they were *diagnosed* and/or  
20  
21 321 *hospitalized* with COVID-19 according to database registration procedures, however,  
22  
23 322 variations could have occurred during the processes by which patients were screened, tested,  
24  
25 323 admitted, and registered across time and the databases. Additionally, the diagnosed and/or  
26  
27 324 hospitalized cohorts were non-mutually exclusive, and therefore could be patients in the  
28  
29 325 diagnosed cohort who were also hospitalized and vice versa.

30  
31  
32  
33 326 This study was carried out using data recorded in routine clinical practice based on EHRs  
34  
35 327 and/or claims, therefore, data could be incomplete or be erroneous, leading to potential  
36  
37 328 misclassification. We have therefore selectively reported database-specific outcomes to  
38  
39 329 minimize the impact of incompleteness. Differential reporting in databases is likely due to  
40  
41 330 different coding practices, different primary and secondary level data availability, as well as  
42  
43 331 variability in disease severity, with milder/less symptomatic cases more likely being only  
44  
45 332 diagnosed, and more severe ones hospitalized. Finally, the data that underpinned this study  
46  
47 333 mostly came from the initial months of the COVID-19 pandemic and may not be  
48  
49 334 representative of the COVID-19 cases diagnosed and/or hospitalized during subsequent  
50  
51 335 periods.

52  
53  
54  
55  
56 336 **CONCLUSIONS**  
57  
58  
59  
60

1  
2  
3 337 COVID-19 patients with hypertension are more likely to have comorbidities, experience  
4  
5 338 more severe outcomes including hospitalizations and deaths (among outpatients with  
6  
7 339 COVID-19) and experience more ARDS and deaths (among inpatients' with COVID-19)  
8  
9 340 compared with patients without hypertension.  
10  
11

12 341

## 14 342 **FIGURE LEGENDS**

16  
17 343 **Figure 1. Comparison of the age and sex distribution in patients with a COVID-19**  
18  
19 344 **diagnosis with and without hypertension in the CHARYBDIS Network, %.** Colour Red=  
20  
21 345 with hypertension, Green= without hypertension.  
22

23  
24 346 **Figure 2. Comparison of the age and sex distribution in patients with a COVID-19**  
25  
26 347 **hospitalization with and without hypertension in the CHARYBDIS Network, %.** Colour  
27  
28 348 Red=with hypertension, Colour Green=without hypertension.  
29

30  
31 349 **Figure 3. Comorbidities at baseline among patients with a COVID-19 diagnosis with**  
32  
33 350 **and without hypertension in the CHARYBDIS Network, %.** Colour Red=with  
34  
35 351 hypertension, Colour Green=without hypertension.  
36

37  
38 352 **Figure 4. Comorbidities at baseline among patients with a COVID-19 hospitalization**  
39  
40 353 **with and without hypertension in the CHARYBDIS Network, %.** Colour Red=with  
41  
42 354 hypertension, Colour Green=without hypertension.  
43

44 355

## 46 356 **CONTRIBUTORSHIP STATEMENT**

47  
48  
49 357 CR, AGS, CA, APU, AG, FN, AO, GH, PRR, KK, TDS, KEL, SLD, MR, ER, SFB and AP  
50  
51 358 provided substantial contributions to the conception or design, analysis, and interpretation of  
52  
53 359 data for the work. CR, AGS, CA, APU, AG, FN, AO, GH, PRR, KK, TDS, KEL, SLD, MR,  
54  
55 360 ER, SFB, AP, DP, NV, GdeM, LSR, JMR, ILM, NHS, PRy, MAS, MEM, CB, LL, TMA, W-  
56  
57 361 U-RA, OA, HA, DD drafted or revised the manuscript critically for important intellectual  
58  
59  
60



1  
2  
3 362 content. All authors approved the final version of the manuscript and CR, AGS, CA, APU,  
4  
5 363 AG, FN, AO, GH, PRR, KK, TDS, LL, TMA, W-U-RA, OA, HA, DD, LMS, CRei, JDP,  
6  
7 364 SCY agreed to be accountable for all aspects of the work (KEL and SLD only for VA data) in  
8  
9 365 ensuring that questions related to the accuracy or integrity of any part of the work are  
10  
11 366 appropriately investigated and resolved.  
12  
13  
14  
15 367

## 16 368 **COMPETING INTERESTS STATEMENT**

17  
18  
19 369 SLDV reports grants from Anolinx; MS, reports grants from US National Institutes of Health,  
20  
21 370 grants from Department of Veterans Affairs, during the conduct of the study; grants from  
22  
23 371 IQVIA, personal fees from Janssen Research and Development, grants from US Food and  
24  
25 372 Drug Administration, personal fees from Private Health Management, outside the submitted  
26  
27 373 work LLC, grants from Astellas Pharma, Inc, grants from AstraZeneca Pharmaceuticals LP,  
28  
29 374 grants from Boehringer Ingelheim International GmbH, grants from Celgene Corporation,  
30  
31 375 grants from Eli Lilly and Company, grants from Genentech Inc., grants from Genomic  
32  
33 376 Health, Inc., grants from Gilead Sciences Inc., grants from GlaxoSmithKline PLC, grants  
34  
35 377 from Innocrin Pharmaceuticals Inc., grants from Janssen Pharmaceuticals, Inc., grants from  
36  
37 378 Kantar Health, grants from Myriad Genetic Laboratories, Inc., grants from Novartis  
38  
39 379 International AG, grants from Parexel International Corporation through the University of  
40  
41 380 Utah or Western Institute for Veteran Research, outside the submitted work; GH, reports  
42  
43 381 grants from NIH, during the conduct of the study; grants from Janssen Research, outside the  
44  
45 382 submitted work; FN, reports that Until 2019 was an employee of AstraZeneca and holds  
46  
47 383 some AstraZeneca shares, outside the submitted work; KK, reports personal fees from  
48  
49 384 National Institutes of Health, outside the submitted work, and at the time of data analysis and  
50  
51 385 initial drafting of the manuscript, KK was an employee of IQVIA Inc; CR reports he is an  
52  
53 386 employee of IQVIA Inc; GdM is Employee of IOMED; NV is an Employee of TFS; AGS  
54  
55  
56  
57  
58  
59  
60

1  
2  
3 387 reports personal fees from Janssen R&D, outside the submitted work and full time employee  
4  
5 388 of Janssen R&D and is a Johnson and Johnson shareholder; CB reports personal fees from  
6  
7 389 Janssen R&D, outside the submitted work and is a full time employee of Janssen R&D and is  
8  
9 a Johnson and Johnson shareholder; JDP reports grants from National Library of Medicine,  
10  
11 390 during the conduct of the study; AG is an employee of Regeneron Pharmaceuticals and  
12  
13 391 reports stocks from Regeneron Pharmaceuticals. PR reports having received research group  
14  
15 392 grants from Innovative Medicine Initiative and Janssen Research and Development; MS  
16  
17 393 reports grants from US National Institutes of Health, grants from Department of Veterans  
18  
19 394 Affairs, during the conduct of the study; grants from IQVIA, personal fees from Janssen  
20  
21 395 Research and Development, grants from US Food and Drug Administration, personal fees  
22  
23 396 from Private Health Management, outside the submitted work; PR, reports and is an  
24  
25 397 employee of Janssen Research and Development and shareholder of Johnson & Johnson; ER,  
26  
27 398 SFB, NHS, LMS, DP, SCY, MR, APU, HA, KEL, MM, AO, CA, CR, TDS, TMA, OA, W-  
28  
29 399 U-RA, ILM, JMR, LSR, DD, LYHL, AP, have nothing to declare. The views expressed are  
30  
31 400 those of the authors and do not necessarily represent the views or policy of the Department of  
32  
33 401 Veterans Affairs or the United States Government. No other relationships or activities could  
34  
35 402 appear to have influenced the submitted work.  
36  
37  
38  
39  
40  
41  
42  
43  
44  
45  
46  
47  
48  
49  
50  
51  
52  
53  
54  
55  
56  
57  
58  
59  
60

## 405 **FUNDING STATEMENT**

406 This work was supported by several funders as follows; The European Health Data &  
407 Evidence Network received funding from the Innovative Medicines Initiative 2 Joint  
408 Undertaking (JU) under grant agreement No 806968. The JU received support from the  
409 European Union's Horizon 2020 research and innovation programme and EFPIA. This  
410 research received partial support from the National Institute for Health Research (NIHR)  
411 Oxford Biomedical Research Centre (BRC), US National Institutes of Health (R01

1  
2  
3 412 LM006910), US Department of Veterans Affairs, the Health Department from the Generalitat  
4  
5 413 de Catalunya with a grant for research projects on SARS-CoV-2 and COVID-19 disease  
6  
7 414 organized by the Direcció General de Recerca i Innovació en Salut, Janssen Research &  
8  
9 415 Development, TFS, IOMED and IQVIA. The University of Oxford received funding related  
10  
11 416 to this work from the Bill & Melinda Gates Foundation (Investment ID INV-016201 and  
12  
13 417 INV-019257). TFS received funding related to this work from the University of Oxford. This  
14  
15 418 work was also supported with funding, [resources, and facilities] of the Department of  
16  
17 419 Veterans Affairs (VA) Informatics and Computing Infrastructure (VINCI), VA HSR RES 13-  
18  
19 420 457. No funders had a direct role in this study. The views and opinions expressed are those of  
20  
21 421 the authors and do not necessarily reflect those of the Clinician Scientist Award programme,  
22  
23 422 NIHR, Department of Veterans Affairs or the United States Government, NHS, or the  
24  
25 423 Department of Health, England.  
26  
27  
28  
29  
30  
31  
32

### 33 425 **DATA SHARING STATEMENT**

34  
35 426 Open Science is a guiding principle within OHDSI. As such, we provide unfettered access to  
36  
37 427 all open-source analysis tools employed in this study via  
38  
39 428 <https://github.com/ohdsi-studies/Covid19CharacterizationCharybdis>, as well as all data and  
40  
41 429 results artefacts that do not include patient-level health information via  
42  
43 430 <https://data.odhsi.org/Covid19CharacterizationCharybdis/>. Data partners contributing to this  
44  
45 431 study remain custodians of their individual patient-level health information and hold either  
46  
47 432 IRB exemption or approval for participation.  
48  
49  
50

51 433

### 52 434 **ACKNOWLEDGEMENTS**

53  
54 435 We would like to acknowledge the patients who suffered from or died of this devastating  
55  
56 436 disease, and their families and carers. We also thank the healthcare professionals involved in  
57  
58  
59  
60

1  
2  
3 437 the management of COVID-19 during these challenging times, from primary care to intensive  
4  
5 438 care units. The authors appreciate the Korean Health Insurance Review and Assessment  
6  
7 439 Service for providing data.

8  
9  
10 440 We also thank the database curation teams around the world including the COVIDMAR  
11  
12 441 Group (JPHorcajada, R.Güerri, J.Villar, M.Montero, S.Gómez-Zorrilla, M.Arenas-Miras,  
13  
14 442 J.Gómez-Junyent, I.Arrieta, E.Sendra, S.Castañeda, E.Letang, I.Pelegrín, A.Rial,  
15  
16 443 J.Rodríguez, C.Gimenez, J.Soldado, E.García).

17  
18  
19 444 We also thank the important contribution to this work of Dr Daniel Prieto-Alhambra.

20  
21  
22 445

## 23 24 446 **ETHICS STATEMENT**

25  
26 447 Before performing these analyses, all the data partners received Institutional Review Board  
27  
28 448 (IRB) approval or exemption. STARR-OMOP had approval from IRB Panel #8 (RB-53248)  
29  
30 449 registered to Leland Stanford Junior University under the Stanford Human Research  
31  
32 450 Protection Program (HRPP). The use of VA-OMOP data was reviewed by the Department of  
33  
34 451 Veterans Affairs Central IRB, was determined to meet the criteria for exemption under  
35  
36 452 Exemption Category 4(3), and approved for Waiver of HIPAA Authorization. The use of  
37  
38 453 SIDIAP was approved by the Clinical Research Ethics Committee of the IDIAPJGol (project  
39  
40 454 code: 20/070-PCV). The use of CPRD was approved by the Independent Scientific Advisory  
41  
42 455 Committee (ISAC) (protocol number 20\_059RA2). The use of the CUIMC database was  
43  
44 456 approved by the Columbia University Institutional Review Board as an OHDSI network  
45  
46 457 study (IRB-AAA07805). The use of HMAR was approved by the Parc de Salut Mar Clinical  
47  
48 458 Research Ethics Committee (Comité de Ética de la Investigación con medicamentos del Parc  
49  
50 459 de Salut MAR, IRB-2020/9183). The use of HIRA database was approved by the IRB of  
51  
52 460 Ajou University ('AJIRB-MED-EXP-20-061'). The Colorado Multiple Institutional Review  
53  
54 461 Board, CB F490University of Colorado, Anschutz Medical Campus extended an exemption  
55  
56  
57  
58  
59  
60

1  
2  
3 462 of IRB certificate on the 17th of November 2020 for the use of the CU-AMC-HDC data for  
4  
5 463 this study. Moreover, given that this study only used de-identified data with no transmission  
6  
7 464 of patient-level information at any time during the analysis and that all data reported was  
8  
9 465 aggregated and no identification of individual patients or physicians was possible, some  
10  
11 466 databases (IQVIA Open Claims, IQVIA DA Germany, IQVIA LPD France, IQVIA LPD  
12  
13 467 Italy, IPCI) deemed this study as being not human subject research and no further approval  
14  
15 468 was necessary. Furthermore, The New England Institutional Review Board of Janssen  
16  
17 469 Research & Development (Raritan, NJ) has determined that studies conducted on licensed  
18  
19 470 copies of Optum EHR and HealthVerity are exempt from study-specific IRB review, as these  
20  
21 471 studies do not qualify as human subject's research.  
22  
23  
24

## 25 472 REFERENCES

- 26  
27  
28 473 1- Weekly Operational Update on COVID-19-6 Sep 2021 [internet]. WHO [cited 9<sup>th</sup>  
29  
30 474 September 2021]. Available from [https://www.who.int/publications/m/item/weekly-](https://www.who.int/publications/m/item/weekly-operational-update-on-covid-19---6-september-2021)  
31  
32 475 [operational-update-on-covid-19---6-september-2021](https://www.who.int/publications/m/item/weekly-operational-update-on-covid-19---6-september-2021).  
33  
34  
35 476 2- Unger T, Borghi C, Charchar F, Khan NA, Poulter NR, Prabhakaran D, et al. 2020  
36  
37 477 International Society of Hypertension global hypertension practice guidelines. *J Hypertens.*  
38  
39 478 2020;38:982-1004.  
40  
41  
42 479 3-Cook TM. The importance of hypertension as a risk factor for severe illness and mortality  
43  
44 480 in COVID-19. *Anaesthesia.* 2020;75:976-977.  
45  
46  
47 481 4-Gupta S, Hayek SS, Wang W, Chan L, Mathews KS, Melamed ML, et al. Factors  
48  
49 482 Associated With Death in Critically Ill Patients With Coronavirus Disease 2019 in the US.  
50  
51 483 *JAMA Intern Med.* 2020;180:1–12.  
52  
53  
54 484 5-Jiménez E, Fontán-Vela M, Valencia J, Fernandez-Jimenez I, Álvaro-Alonso EA,  
55  
56 485 Izquierdo-García E, et al. Characteristics, complications and outcomes among 1549 patients  
57  
58  
59  
60

- 1  
2  
3 486 hospitalised with COVID-19 in a secondary hospital in Madrid, Spain: a retrospective case  
4  
5  
6 487 series study. *BMJ Open*. 2020;10:e042398.  
7  
8 488 6-Huang S, Wang J, Liu F, Liu J, Cao G, Yang C, et al. COVID-19 patients with  
9  
10 489 hypertension have more severe disease: a multicenter retrospective observational study.  
11  
12  
13 490 *Hypertens Res*. 2020;43:824-831.  
14  
15  
16 491 7-Park BE, Lee JH, Park HK, Kim HN, Jang SY, Bae MH, et al. Impact of Cardiovascular  
17  
18 492 Risk Factors and Cardiovascular Diseases on Outcomes in Patients Hospitalized with  
19  
20  
21 493 COVID-19 in Daegu Metropolitan City. *J Korean Med Sci*. 2021;36:e15.  
22  
23  
24 494 8- Yao Q, Ni J, Hu TT, Cai ZL, Zhao JH, Xie QW, et al. Clinical characteristics and  
25  
26 495 outcomes in coronavirus disease 2019 (COVID-19) patients with and without hypertension: a  
27  
28 496 retrospective study. *Rev Cardiovasc Med*. 2020;21:615-625.  
29  
30  
31 497 9- Zhou F, Yu T, Du R, Fan G, Liu Y, Liu Z, et al. Clinical course and risk factors for  
32  
33 498 mortality of adult inpatients with COVID-19 in Wuhan, China: a retrospective cohort study.  
34  
35  
36 499 *Lancet*. 2020;395(10229):1054-1062.  
37  
38  
39 500 10-Wang Y, Lu X, Li Y, Chen H, Chen T, Su N, et al. Clinical Course and Outcomes of 344  
40  
41 501 Intensive Care Patients with COVID-19. *Am J Respir Crit Care Med*. 2020;201:1430-1434.  
42  
43  
44 502 11-Grasselli G, Zangrillo A, Zanella A, Antonelli M, Cabrini L, Castelli A, et al. Baseline  
45  
46 503 Characteristics and Outcomes of 1591 Patients Infected With SARS-CoV-2 Admitted to  
47  
48 504 ICUs of the Lombardy Region, Italy. *JAMA*. 2020;323:1574-1581.  
49  
50  
51 505 12-Gao C, Cai Y, Zhang K, Zhou L, Zhang Y, Zhang X, et al. Association of hypertension  
52  
53 506 and antihypertensive treatment with COVID-19 mortality: a retrospective observational  
54  
55  
56 507 study. *Eur Heart J*. 2020;41:2058-2066.  
57  
58  
59  
60

- 1  
2  
3 508 13- Guan WJ, Liang WH, Zhao Y, Liang HR, Chen ZS, Li YM, et al. Comorbidity and its  
4  
5  
6 509 impact on 1590 patients with COVID-19 in China: a nationwide analysis. *Eur Respir J*.  
7  
8 510 2020;55:2000547.  
9  
10  
11 511 14- Ji W, Huh K, Kang M, Hong J, Bae GH, Lee R, et al. Effect of Underlying Comorbidities  
12  
13 512 on the Infection and Severity of COVID-19 in Korea: a Nationwide Case-Control Study. *J*  
14  
15 513 *Korean Med Sci*. 2020;35:e237.  
16  
17  
18 514 15- Chilimuri S, Sun H, Alemam A, Mantri N, Shehi E, Tejada J, et al. Predictors of  
19  
20 515 Mortality in Adults Admitted with COVID-19: Retrospective Cohort Study from New York  
21  
22 516 City. *West J Emerg Med*. 2020;21:779-784.  
23  
24  
25 517 16- Richardson S, Hirsch JS, Narasimhan M, Crawford JM, McGinn T, Davidson KW, et al.  
26  
27 518 Presenting Characteristics, Comorbidities, and Outcomes Among 5700 Patients Hospitalized  
28  
29 519 With COVID-19 in the New York City Area. *JAMA*. 2020;323:2052-2059. Erratum in:  
30  
31 520 *JAMA*. 2020;323:2098.  
32  
33  
34 521 17-Dorjee K, Kim H, Bonomo E, Dolma R. Prevalence and predictors of death and severe  
35  
36 522 disease in patients hospitalized due to COVID-19: A comprehensive systematic review and  
37  
38 523 meta-analysis of 77 studies and 38,000 patients. *PLoS One*. 2020;15:e0243191.  
39  
40  
41 524 18-Javanmardi F, Keshavarzi A, Akbari A, Emami A, Pirbonyeh N. Prevalence of underlying  
42  
43 525 diseases in dead cases of COVID-19: A systematic review and meta-analysis. *PLoS One*.  
44  
45 526 2020;15:e0241265.  
46  
47  
48 527 19-Pranata R, Lim MA, Huang I, Raharjo SB, Lukito AA. Hypertension is associated with  
49  
50 528 increased mortality and severity of disease in COVID-19 pneumonia: A systematic review,  
51  
52 529 meta-analysis and meta-regression. *J Renin Angiotensin Aldosterone Syst*.  
53  
54 530 2020;21:1470320320926899.  
55  
56  
57  
58  
59  
60

- 1  
2  
3 531 20- Silverio A, Di Maio M, Citro R, Esposito L, Iuliano G, Bellino M, et al. Cardiovascular  
4  
5  
6 532 risk factors and mortality in hospitalized patients with COVID-19: systematic review and  
7  
8 533 meta-analysis of 45 studies and 18,300 patients. *BMC Cardiovasc Disord.* 2021;21:23.  
9  
10  
11 534 21- Moazzami B, Chaichian S, Kasaeian A, Djalalinia S, Akhlaghdoust M, Eslami M, et al.  
12  
13 535 Metabolic risk factors and risk of Covid-19: A systematic review and meta-analysis. *PLoS*  
14  
15 536 *One.* 2020;15:e0243600.  
17  
18 537 22- Baj J, Karakuła-Juchnowicz H, Teresiński G, Buszewicz G, Ciesielka M, Sitarz E, et al.  
19  
20 538 COVID-19: Specific and Non-Specific Clinical Manifestations and Symptoms: The Current  
21  
22 539 State of Knowledge. *J Clin Med.* 2020;9:1753.  
23  
24  
25 540 23- Prieto-Alhambra D, Kostka K, Duarte-Salles T, Prats-Uribe A, Sena A, Pistillo A, et al.  
26  
27 541 Unraveling COVID-19: a large-scale characterization of 4.5 million COVID-19 cases using  
28  
29 542 CHARYBDIS. *Res Sq [Preprint].* 2021:rs.3.rs-279400.  
30  
31  
32 543 24- García-Gil M del M, Hermosilla E, Prieto-Alhambra D, Fina F, Rosell M, Ramos R, et al.  
33  
34 544 Construction and validation of a scoring system for the selection of high-quality data in a  
35  
36 545 Spanish population primary care database (SIDIAP). *Inform Prim Care.* 2011; 19(3): 135–45  
37  
38 546 25-Datta S, Posada J, Olson G, Li W, O'Reilly C, Balraj D, et al. A new paradigm for  
39  
40 547 accelerating clinical data science at Stanford Medicine. *arXiv:2003.10534*  
41  
42  
43 548 26-Voss EA, Makadia R, Matcho A, Ma Q, Knoll C, Schuemie M, et al. Feasibility and  
44  
45 549 utility of applications of the common data model to multiple, disparate observational health  
46  
47 550 databases. *J Am Med Inform Assoc.* 2015;22:553-64.  
48  
49  
50 551 27-Tsimihodimos V, Gonzalez-Villalpando C, Meigs JB, Ferrannini E. Hypertension and  
51  
52 552 Diabetes Mellitus: Coprediction and Time Trajectories. *Hypertension.* 2018;71:422-428.  
53  
54  
55 553  
56  
57 554  
58  
59  
60



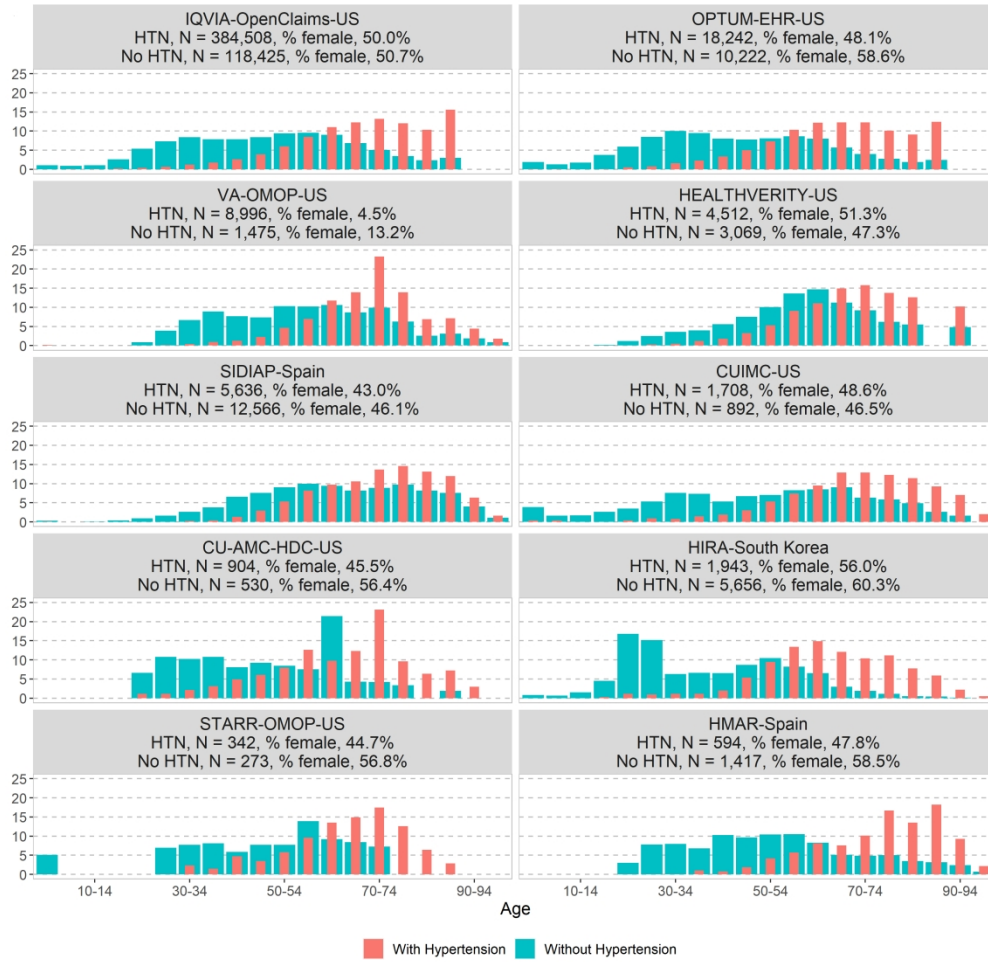

Figure 1. Comparison of the age and sex distribution in patients with a COVID-19 diagnosis with and without hypertension in the CHARYBDIS Network, %. Colour Red= with hypertension, Green= without hypertension.

729x710mm (118 x 118 DPI)

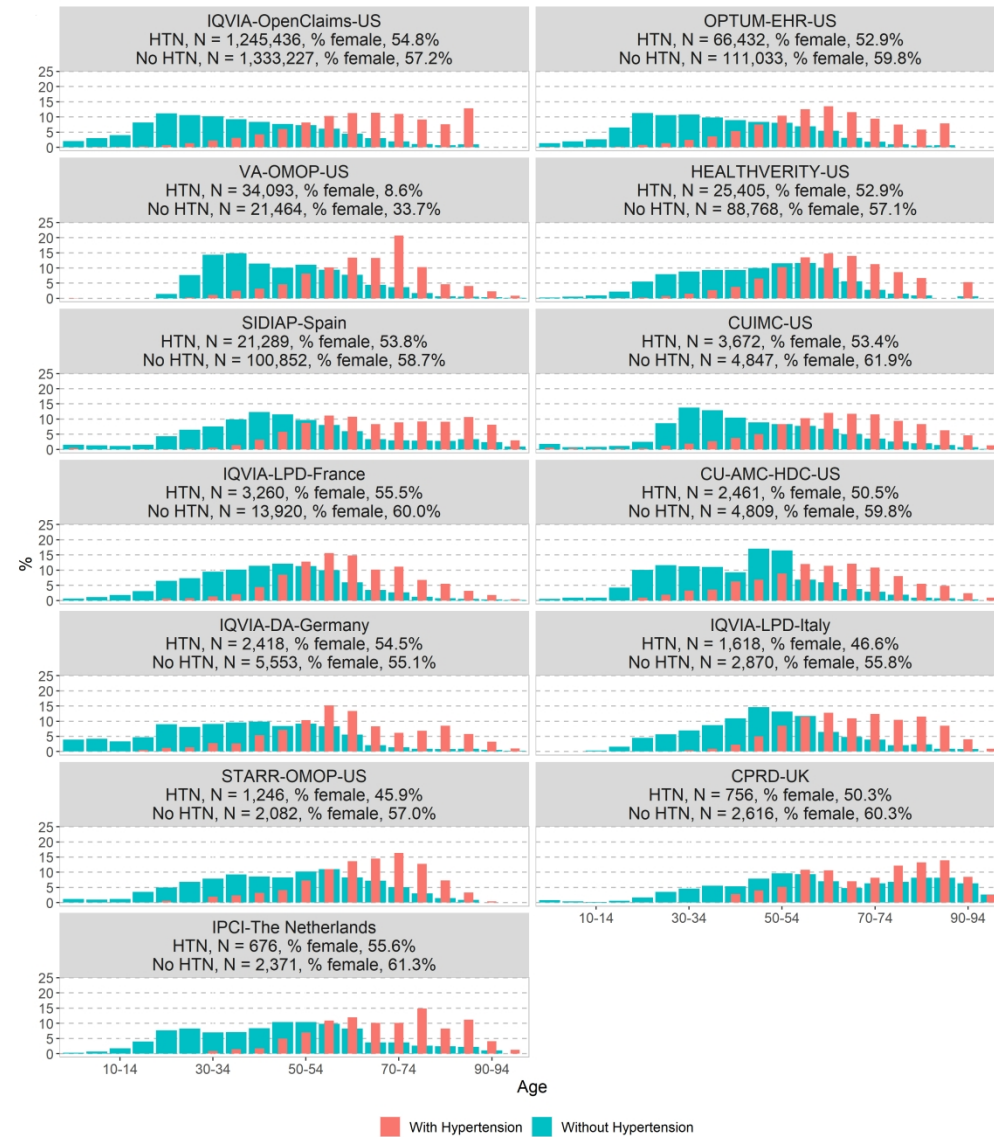

Figure 2. Comparison of the age and sex distribution in patients with a COVID-19 hospitalization with and without hypertension in the CHARYBDIS Network, %. Colour Red=with hypertension, Colour Green=without hypertension.

729x839mm (118 x 118 DPI)

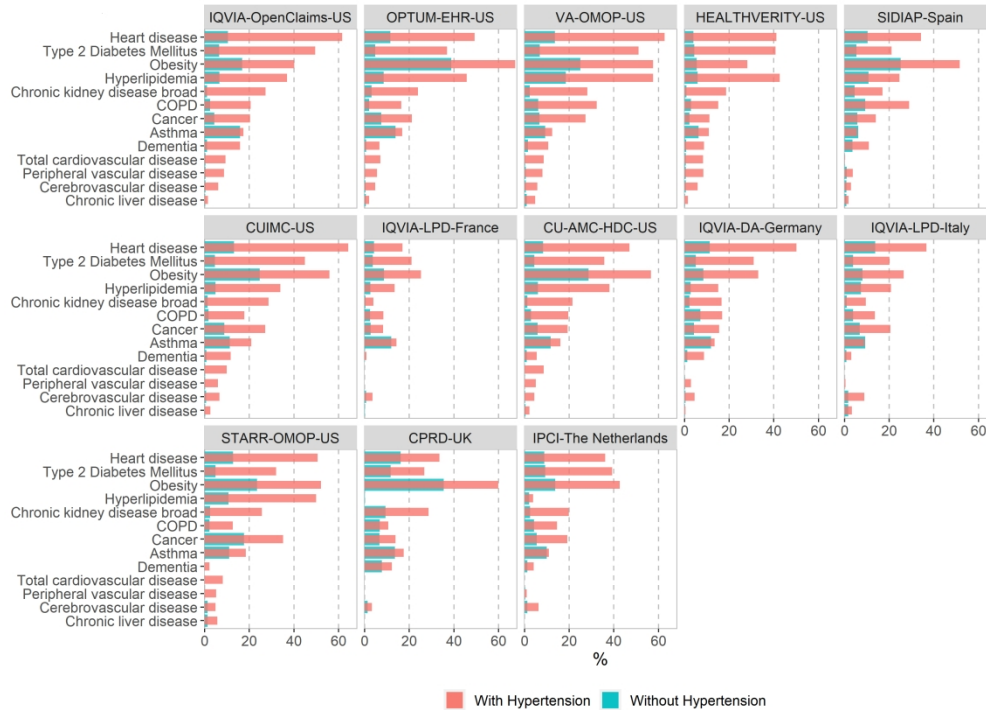

Figure 3. Comorbidities at baseline among patients with a COVID-19 diagnosis with and without hypertension in the CHARYBDIS Network, %. Colour Red=with hypertension, Colour Green=without hypertension.

710x516mm (118 x 118 DPI)

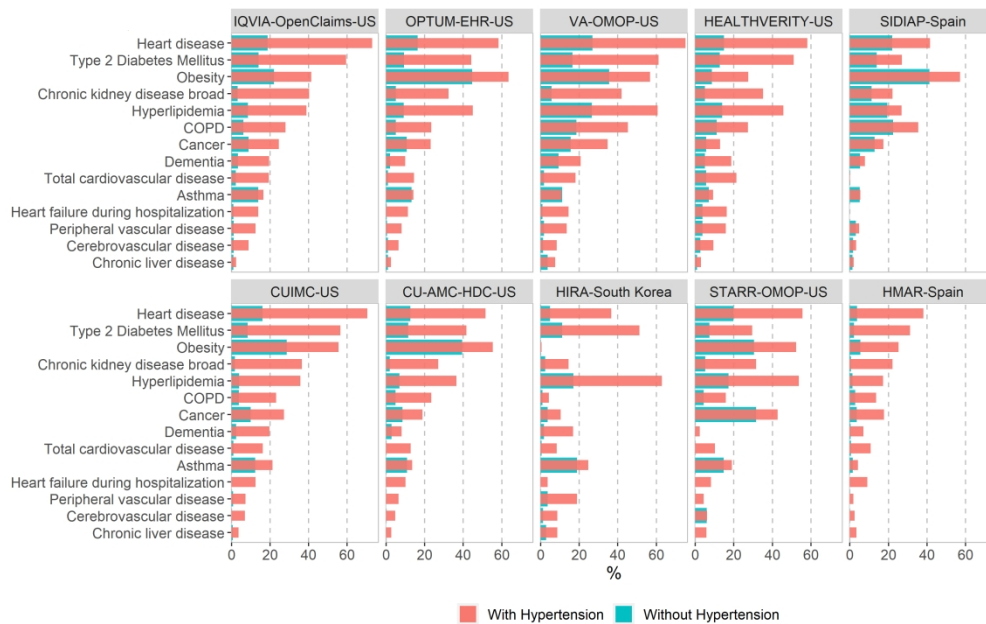

Figure 4. Comorbidities at baseline among patients with a COVID-19 hospitalization with and without hypertension in the CHARYBDIS Network, %. Colour Red=with hypertension, Colour Green=without hypertension.

710x452mm (118 x 118 DPI)

## Supporting Figure 1. Flowchart showing the selection of databases included in the analyses

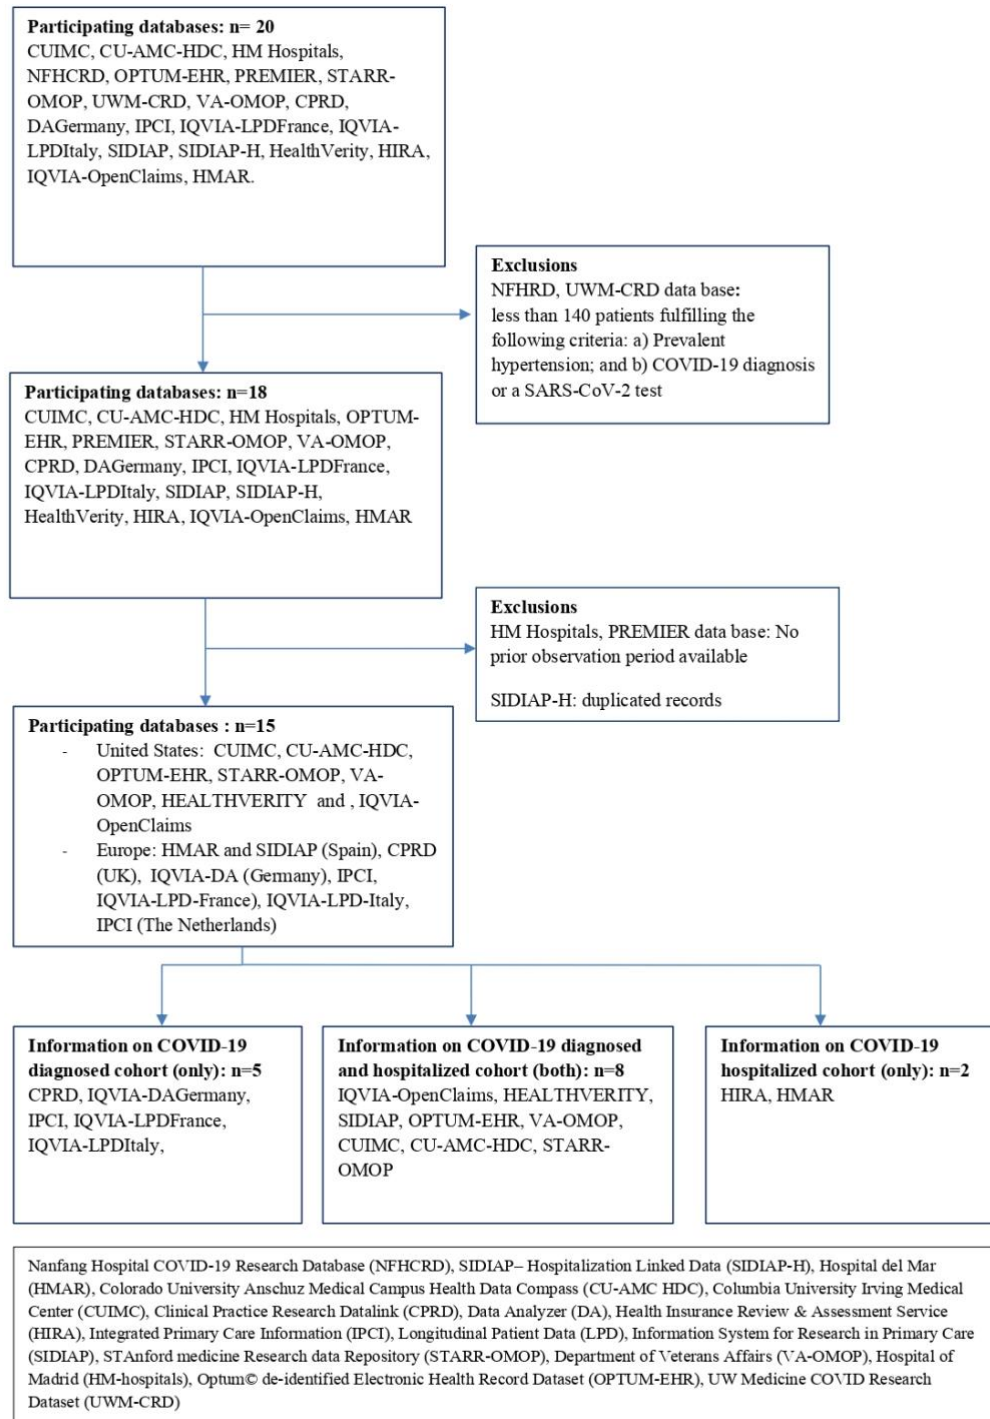

1  
2  
3  
4  
5  
6 **1 Supporting Table 1. Description of included databases**  
7  
8  
9

10  
11  
12  
13  
14  
15  
16  
17  
18  
19  
20  
21  
22  
23  
24  
25  
26  
27  
28  
29  
30  
31  
32  
33  
34  
35  
36  
37  
38  
39  
40  
41  
42  
43  
44  
45  
46

| Institution Name/<br>Database                                                    | Database Description                                                                                                                                                                                                                                                                                                                                                                                                                                                                                                                                                                                                                                                                                                                                                                                                                                                                                                                                                                                                                                         | Country        |
|----------------------------------------------------------------------------------|--------------------------------------------------------------------------------------------------------------------------------------------------------------------------------------------------------------------------------------------------------------------------------------------------------------------------------------------------------------------------------------------------------------------------------------------------------------------------------------------------------------------------------------------------------------------------------------------------------------------------------------------------------------------------------------------------------------------------------------------------------------------------------------------------------------------------------------------------------------------------------------------------------------------------------------------------------------------------------------------------------------------------------------------------------------|----------------|
| Janssen Research & Development<br>The Clinical Practice Research Datalink (CPRD) | The Clinical Practice Research Datalink (CPRD) is a governmental not-for-profit research service jointly funded by the NHS National Institute for Health Research (NIHR) and the Medicines and Healthcare products Regulatory Agency (MHRA) a part of the Department of Health United Kingdom (UK). CPRD consists of data collected from UK primary care for all ages. This includes conditions observations measurements and procedures that the general practitioner is made aware of in addition to any prescriptions as prescribed by the general practitioner. In addition to primary care there are also linked secondary care records for a small number of people. The major data elements contained within this database are outpatient prescriptions given by the general practitioner (coded with Multilex codes) and outpatient clinical referral immunization or test events that the general practitioner knows about (coded in Read or ICD10 or LOINC codes). The database also contains the patients' year of births and any date of deaths. | United Kingdom |
| IDIAPJGol<br>The Information System for Research in Primary Care (SIDIAP)        | The Information System for Research in Primary Care (SIDIAP; www.sidiap.org) is a primary care records database that covers approximately 80% of the population of Catalonia North-East Spain. Healthcare is universal and tax-payer funded in the region and primary care physicians are gatekeepers for all care and responsible for repeat prescriptions.                                                                                                                                                                                                                                                                                                                                                                                                                                                                                                                                                                                                                                                                                                 | Spain          |
| Stanford Medicine Research Data Repository (STARR-OMOP)                          | A clinical data warehouse containing live Epic data from Stanford Health Care the Stanford Children's Hospital                                                                                                                                                                                                                                                                                                                                                                                                                                                                                                                                                                                                                                                                                                                                                                                                                                                                                                                                               | United States  |

|                                                      |                                                                                                                                                                                                                                                                                                                                                                                                                                                                                                                                                                                                                                                                                                                                                                                        |               |
|------------------------------------------------------|----------------------------------------------------------------------------------------------------------------------------------------------------------------------------------------------------------------------------------------------------------------------------------------------------------------------------------------------------------------------------------------------------------------------------------------------------------------------------------------------------------------------------------------------------------------------------------------------------------------------------------------------------------------------------------------------------------------------------------------------------------------------------------------|---------------|
|                                                      | the University Healthcare Alliance and Packard Children's Health Alliance clinics.<br>Reference: Datta S Posada J Olson G <i>et al.</i> A new paradigm for accelerating clinical data science at Stanford Medicine. <i>arXiv</i> 2020; published online March 17. <a href="http://arxiv.org/abs/2003.10534">http://arxiv.org/abs/2003.10534</a> (accessed Aug 20 2020).                                                                                                                                                                                                                                                                                                                                                                                                                |               |
| Columbia University Irving Medical Center (CUIMC)    | The clinical data warehouse of New York-Presbyterian Hospital/Columbia University Irving Medical Center New York NY based on its current and previous electronic health record systems with data spanning over 30 years and including over 6 million patients                                                                                                                                                                                                                                                                                                                                                                                                                                                                                                                          | United States |
| IQVIA<br>Open Claims                                 | Pre-adjudicated claims covering over 300 Million lives (~80% of the US) collected from office-based physicians and specialists via office management software and clearinghouse switch sources for the purpose of reimbursement.                                                                                                                                                                                                                                                                                                                                                                                                                                                                                                                                                       | United States |
| HIRA<br>Health Insurance Review & Assessment Service | National claim data from a single insurance service from South Korea, It contains the observational medical records (including both inpatient and outpatient) of a patient while they are qualified to get the national medical insurance.                                                                                                                                                                                                                                                                                                                                                                                                                                                                                                                                             | South Korea   |
| HMAR<br>Hospital del mar                             | Anonymized data from the Electronic Medical Records from Hospital del Mar (Barcelona, Spain). Hospital belonging to the Spanish National Health System (public), attending the Eastern area of Barcelona City. Includes hospital data collected routinely in the clinical practice, both structured and unstructured information, extracted using a free text analysis tool (with natural language processing): Inpatient (hospital) care, Outpatient specialist care, Emergency Room Visits and partial information from other settings like primary care and pharmacy care present in free text notes from EMRs. All subjects with at least one healthcare encounter with the Hospital within approximately last 20 years are included (approximately 0.6 M subjects, with more than | Spain         |

|                                                                    |                                                                                                                                                                                                                                                                                                                                                                                                                                                                                                                                                         |                 |
|--------------------------------------------------------------------|---------------------------------------------------------------------------------------------------------------------------------------------------------------------------------------------------------------------------------------------------------------------------------------------------------------------------------------------------------------------------------------------------------------------------------------------------------------------------------------------------------------------------------------------------------|-----------------|
|                                                                    | 5 M hospitalizations/visits). Hospital del Mar data are made available through collaboration with TFS / IOMED.                                                                                                                                                                                                                                                                                                                                                                                                                                          |                 |
| OPTUM-EHR<br>Optum® de-identified Electronic Health Record Dataset | Optum ® de-identified Electronic Health Record Dataset is derived from dozens of healthcare provider organizations in the United States (that include more than 700 hospitals and 7,000 Clinics treating more than 103 million patients) receiving care in the United States. The medical record data includes clinical information, inclusive of prescriptions as prescribed and administered, lab results, vital signs, body measurements, diagnoses, procedures, and information derived from clinical Notes using Natural Language Processing (NLP) | United States   |
| IPCI<br>Integrated Primary Care Information                        | The Integrated Primary Care Information (IPCI) database is collected from EHR records of patients registered with 391 GPs throughout the Netherlands. The database contains records from approximately 2.6 million patients out of a Dutch population of 17M (8.2%) starting in 1996.                                                                                                                                                                                                                                                                   | The Netherlands |
| DA Germany<br>IQVIA Disease Analyser Germany                       | IQVIA DA Germany is collected from extracts of patient management software used by GPs and specialists practicing in ambulatory care settings. Data coverage includes more than 34M distinct person records out of a total population of 80M (42.5%) in the country and collected from 2,734 providers. Dates of service include from 1992 through March 2020                                                                                                                                                                                           | Germany         |
| LPD-Italy<br>IQVIA LPD Italy                                       | LPD Italy is comprised of anonymised patient records collected from software used by GPs during an office visit to document patients' clinical records. Data coverage includes over 2M patient records with at least one visit and 119.5M prescription orders across 900 GP practices. Dates of service include from 2004 through                                                                                                                                                                                                                       | Italy           |



1  
2  
3  
4  
5  
6  
7  
8  
9  
10  
11  
12  
13  
14  
15  
16  
17  
18  
19  
20  
21  
22  
23  
24  
25  
26  
27  
28  
29  
30  
31  
32  
33  
34  
35  
36  
37  
38  
39  
40  
41  
42  
43  
44  
45  
46

|                                                                                 |                                                                                                                                                                                                                                                                                                                                                                                                                                                                                                                                           |               |
|---------------------------------------------------------------------------------|-------------------------------------------------------------------------------------------------------------------------------------------------------------------------------------------------------------------------------------------------------------------------------------------------------------------------------------------------------------------------------------------------------------------------------------------------------------------------------------------------------------------------------------------|---------------|
|                                                                                 | present. Observation time is defined by the first and last consultation dates. Drugs are captured as prescription records with product, quantity, dosing directions, strength, indication and date of consultation.                                                                                                                                                                                                                                                                                                                       |               |
| LPD-France                                                                      | LPD France is a computerised network of physicians including GPs who contribute to a centralised database of anonymised patient EMR. Currently, >1200 GPs from 400 practices are contributing to the database covering 7.8M patients in France. The database covers a time period from 1994 through the present. Observation time is defined by the first and last consultation dates. Drug information is derived from GP prescriptions. Drugs obtained over the counter by the patient outside the prescription system are not reported | France        |
| HEALTHVERITY                                                                    | This HealthVerity derived data set contains de-identified patient information with an antibody and/or diagnostic test for COVID-19 linked to all available Medical Claims and Pharmacy Data from select private data providers participating in the HealthVerity marketplace.                                                                                                                                                                                                                                                             | United States |
| University of Colorado Anschutz Medical Campus Health Data Compass (CU-AMC HDC) | Health Data Compass (HDC) is a multi-institutional data warehouse. HDC contains inpatient and outpatient electronic medical data including patient, encounter, diagnosis, procedures, medications, laboratory results from two electronic medical record systems (UCHealth and Children's Hospital of Colorado), state-level all-payers claims data, and the Colorado death registry. Acknowledgement statement: Supported by the Health Data Compass Data Warehouse project (healthdatacompass.org)                                      |               |
| Department of Veterans Affairs<br>VA- OMOP                                      | VA-OMOP data reflects the national Department of Veterans Affairs health care system which is the largest integrated provider of medical and mental health services                                                                                                                                                                                                                                                                                                                                                                       | United States |

in the United States. Care is provided at 170 VA Medical Centers and 1 063 outpatient sites serving more than 9 million enrolled Veterans each year.

## Supporting Table 2. Definitions and codes used to identify COVID-19 cases

The below tables summarises the concepts used to identify patients diagnosed with COVID-19 . The full description of the logic used to identify patients diagnosed and hospitalized is provided at <https://atlas.ohdsi.org/#/cohortdefinition/200> and <https://atlas.ohdsi.org/#/cohortdefinition/197> respectively.

| COVID-19 condition codes |                                                            |                |
|--------------------------|------------------------------------------------------------|----------------|
| Id                       | Name                                                       | Vocabulary     |
| 756023                   | Acute bronchitis due to COVID-19                           | OMOP Extension |
| 756044                   | Acute respiratory distress syndrome (ARDS) due to COVID-19 | OMOP Extension |
| 756061                   | Asymptomatic COVID-19                                      | OMOP Extension |
| 756031                   | Bronchitis due to COVID-19                                 | OMOP Extension |
| 439676                   | Coronavirus infection                                      | SNOMED         |
| 37311061                 | Disease caused by 2019-nCoV                                | SNOMED         |
| 4100065                  | Disease due to Coronaviridae                               | SNOMED         |
| 37310284                 | Encephalopathy caused by 2019 novel coronavirus            | SNOMED         |

|                                                                                                                          |                                                                       |                   |
|--------------------------------------------------------------------------------------------------------------------------|-----------------------------------------------------------------------|-------------------|
| 37310283                                                                                                                 | Gastroenteritis caused by 2019 novel coronavirus                      | SNOMED            |
| 4248811                                                                                                                  | Healthcare associated severe acute respiratory syndrome               | SNOMED            |
| 756081                                                                                                                   | Infection of lower respiratory tract due to COVID-19                  | OMOP<br>Extension |
| 37310286                                                                                                                 | Infection of upper respiratory tract caused by 2019 novel coronavirus | SNOMED            |
| 45763594                                                                                                                 | Middle East respiratory syndrome                                      | SNOMED            |
| 37310287                                                                                                                 | Myocarditis caused by 2019 novel coronavirus                          | SNOMED            |
| 37310254                                                                                                                 | Otitis media caused by 2019 novel coronavirus                         | SNOMED            |
| 37310285                                                                                                                 | Pneumonia caused by 2019 novel coronavirus                            | SNOMED            |
| 37016927                                                                                                                 | Pneumonia caused by Human coronavirus                                 | SNOMED            |
| 40479642                                                                                                                 | Pneumonia due to Severe acute respiratory syndrome coronavirus        | SNOMED            |
| 756039                                                                                                                   | Respiratory infection due to COVID-19                                 | OMOP<br>Extension |
| 320651                                                                                                                   | Severe acute respiratory syndrome                                     | SNOMED            |
| 37396171                                                                                                                 | Severe acute respiratory syndrome of upper respiratory tract          | SNOMED            |
| 37311060                                                                                                                 | Suspected disease caused by 2019-nCoV                                 | SNOMED            |
| <b>COVID-19 specific testing - Positive</b>                                                                              |                                                                       |                   |
| 37310282                                                                                                                 | 2019 novel coronavirus detected                                       | SNOMED            |
| <b>COVID-19 specific testing (note these required a corresponding value as concept of: Detected Positive or Present)</b> |                                                                       |                   |

|          |                                                                                                                                                                                  |                |
|----------|----------------------------------------------------------------------------------------------------------------------------------------------------------------------------------|----------------|
| 37310255 | Detection of 2019 novel coronavirus using polymerase chain reaction technique                                                                                                    | SNOMED         |
| 700360   | Infectious agent detection by nucleic acid (DNA or RNA); severe acute respiratory syndrome coronavirus 2 (SARS-CoV-2) (Coronavirus disease [COVID-19]) amplified probe technique | CPT4           |
| 37310258 | Measurement of 2019 novel coronavirus antibody                                                                                                                                   | SNOMED         |
| 37310257 | Measurement of 2019 novel coronavirus antigen                                                                                                                                    | SNOMED         |
| 756055   | Measurement of Severe acute respiratory syndrome coronavirus 2 (SARS-CoV-2)                                                                                                      | OMOP Extension |
| 586310   | Measurement of Severe acute respiratory syndrome coronavirus 2 (SARS-CoV-2) Genetic material using Molecular method                                                              | OMOP Extension |
| 704991   | Measurement of Severe acute respiratory syndrome coronavirus 2 (SARS-CoV-2) in Blood                                                                                             | OMOP Extension |
| 756029   | Measurement of Severe acute respiratory syndrome coronavirus 2 (SARS-CoV-2) in Respiratory specimen                                                                              | OMOP Extension |
| 586307   | Measurement of Severe acute respiratory syndrome coronavirus 2 (SARS-CoV-2) in Saliva                                                                                            | OMOP Extension |
| 705107   | Measurement of Severe acute respiratory syndrome coronavirus 2 (SARS-CoV-2) in Sample from nose                                                                                  | OMOP Extension |
| 586309   | Measurement of Severe acute respiratory syndrome coronavirus 2 (SARS-CoV-2) in Specified specimen                                                                                | OMOP Extension |
| 756065   | Measurement of Severe acute respiratory syndrome coronavirus 2 (SARS-CoV-2) in Unspecified specimen                                                                              | OMOP Extension |
| 704992   | Measurement of Severe acute respiratory syndrome coronavirus 2 (SARS-CoV-2) using Culture method                                                                                 | OMOP Extension |
| 705001   | Measurement of Severe acute respiratory syndrome coronavirus 2 (SARS-CoV-2) using Nucleic acid amplification technique                                                           | OMOP Extension |
| 705000   | Measurement of Severe acute respiratory syndrome coronavirus 2 (SARS-CoV-2) using Nucleic acid amplification technique in Blood                                                  | OMOP Extension |
| 756085   | Measurement of Severe acute respiratory syndrome coronavirus 2 (SARS-CoV-2) using Nucleic acid amplification technique in Respiratory specimen                                   | OMOP Extension |
| 586308   | Measurement of Severe acute respiratory syndrome coronavirus 2 (SARS-CoV-2) using Nucleic acid amplification technique in Saliva                                                 | OMOP Extension |
| 705106   | Measurement of Severe acute respiratory syndrome coronavirus 2 (SARS-CoV-2) using Nucleic acid amplification technique in Sample from nose                                       | OMOP Extension |
| 756084   | Measurement of Severe acute respiratory syndrome coronavirus 2 (SARS-CoV-2) using Nucleic acid amplification technique in Unspecified specimen                                   | OMOP Extension |
| 704993   | Measurement of Severe acute respiratory syndrome coronavirus 2 (SARS-CoV-2) using Sequencing                                                                                     | OMOP Extension |

1  
2  
3  
4  
5  
6  
7  
8  
9  
10  
11  
12  
13  
14  
15  
16  
17  
18  
19  
20  
21  
22  
23  
24  
25  
26  
27  
28  
29  
30  
31  
32  
33  
34  
35  
36  
37  
38  
39  
40  
41  
42  
43  
44  
45  
46

|        |                                                                                                     |       |
|--------|-----------------------------------------------------------------------------------------------------|-------|
| 586516 | SARS-CoV-2 (COVID19) [Presence] in Unspecified specimen by Organism specific culture                | LOINC |
| 723480 | SARS-CoV-2 (COVID19) Ab [Interpretation] in Serum or Plasma                                         | LOINC |
| 586515 | SARS-CoV-2 (COVID19) Ab [Presence] in Serum or Plasma by Immunoassay                                | LOINC |
| 586522 | SARS-CoV-2 (COVID19) Ab [Units/volume] in Serum or Plasma by Immunoassay                            | LOINC |
| 706179 | SARS-CoV-2 (COVID19) Ab panel - Serum or Plasma by Immunoassay                                      | LOINC |
| 723477 | SARS-CoV-2 (COVID19) Ag [Presence] in Respiratory specimen by Rapid immunoassay                     | LOINC |
| 706166 | SARS-CoV-2 (COVID19) E gene [Cycle Threshold #] in Unspecified specimen by NAA with probe detection | LOINC |
| 586523 | SARS-CoV-2 (COVID19) E gene [Presence] in Respiratory specimen by NAA with probe detection          | LOINC |
| 586518 | SARS-CoV-2 (COVID19) E gene [Presence] in Serum or Plasma by NAA with probe detection               | LOINC |
| 706174 | SARS-CoV-2 (COVID19) E gene [Presence] in Unspecified specimen by NAA with probe detection          | LOINC |
| 723473 | SARS-CoV-2 (COVID19) IgA Ab [Presence] in Serum or Plasma by Immunoassay                            | LOINC |
| 586521 | SARS-CoV-2 (COVID19) IgA Ab [Presence] in Serum Plasma or Blood by Rapid immunoassay                | LOINC |
| 723459 | SARS-CoV-2 (COVID19) IgA Ab [Units/volume] in Serum or Plasma by Immunoassay                        | LOINC |
| 757686 | SARS-CoV-2 (COVID19) IgA+IgM [Presence] in Serum or Plasma by Immunoassay                           | LOINC |
| 586527 | SARS-CoV-2 (COVID19) IgG Ab [Presence] in DBS by Immunoassay                                        | LOINC |
| 723474 | SARS-CoV-2 (COVID19) IgG Ab [Presence] in Serum or Plasma by Immunoassay                            | LOINC |
| 706181 | SARS-CoV-2 (COVID19) IgG Ab [Presence] in Serum Plasma or Blood by Rapid immunoassay                | LOINC |
| 706177 | SARS-CoV-2 (COVID19) IgG Ab [Units/volume] in Serum or Plasma by Immunoassay                        | LOINC |
| 706176 | SARS-CoV-2 (COVID19) IgG and IgM panel - Serum Plasma or Blood by Rapid immunoassay                 | LOINC |
| 723479 | SARS-CoV-2 (COVID19) IgG+IgM Ab [Presence] in Serum or Plasma by Immunoassay                        | LOINC |

|        |                                                                                                                                     |       |
|--------|-------------------------------------------------------------------------------------------------------------------------------------|-------|
| 723475 | SARS-CoV-2 (COVID19) IgM Ab [Presence] in Serum or Plasma by Immunoassay                                                            | LOINC |
| 706180 | SARS-CoV-2 (COVID19) IgM Ab [Presence] in Serum Plasma or Blood by Rapid immunoassay                                                | LOINC |
| 706178 | SARS-CoV-2 (COVID19) IgM Ab [Units/volume] in Serum or Plasma by Immunoassay                                                        | LOINC |
| 706167 | SARS-CoV-2 (COVID19) N gene [Cycle Threshold #] in Unspecified specimen by NAA with probe detection                                 | LOINC |
| 706157 | SARS-CoV-2 (COVID19) N gene [Cycle Threshold #] in Unspecified specimen by Nucleic acid amplification using CDC primer-probe set N1 | LOINC |
| 706155 | SARS-CoV-2 (COVID19) N gene [Cycle Threshold #] in Unspecified specimen by Nucleic acid amplification using CDC primer-probe set N2 | LOINC |
| 715272 | SARS-CoV-2 (COVID19) N gene [Presence] in Nasopharynx by NAA with probe detection                                                   | LOINC |
| 757678 | SARS-CoV-2 (COVID19) N gene [Presence] in Nose by NAA with probe detection                                                          | LOINC |
| 706161 | SARS-CoV-2 (COVID19) N gene [Presence] in Respiratory specimen by NAA with probe detection                                          | LOINC |
| 586524 | SARS-CoV-2 (COVID19) N gene [Presence] in Respiratory specimen by Nucleic acid amplification using CDC primer-probe set N1          | LOINC |
| 586525 | SARS-CoV-2 (COVID19) N gene [Presence] in Respiratory specimen by Nucleic acid amplification using CDC primer-probe set N2          | LOINC |
| 586520 | SARS-CoV-2 (COVID19) N gene [Presence] in Serum or Plasma by NAA with probe detection                                               | LOINC |
| 706175 | SARS-CoV-2 (COVID19) N gene [Presence] in Unspecified specimen by NAA with probe detection                                          | LOINC |
| 706156 | SARS-CoV-2 (COVID19) N gene [Presence] in Unspecified specimen by Nucleic acid amplification using CDC primer-probe set N1          | LOINC |
| 706154 | SARS-CoV-2 (COVID19) N gene [Presence] in Unspecified specimen by Nucleic acid amplification using CDC primer-probe set N2          | LOINC |
| 757680 | SARS-CoV-2 (COVID19) neutralizing antibody [Presence] in Serum by pVNT                                                              | LOINC |
| 757679 | SARS-CoV-2 (COVID19) neutralizing antibody [Titer] in Serum by pVNT                                                                 | LOINC |
| 723469 | SARS-CoV-2 (COVID19) ORF1ab region [Cycle Threshold #] in Respiratory specimen by NAA with probe detection                          | LOINC |
| 706168 | SARS-CoV-2 (COVID19) ORF1ab region [Cycle Threshold #] in Unspecified specimen by NAA with probe detection                          | LOINC |
| 723478 | SARS-CoV-2 (COVID19) ORF1ab region [Presence] in Respiratory specimen by NAA with probe detection                                   | LOINC |

1  
2  
3  
4  
5  
6  
7  
8  
9  
10  
11  
12  
13  
14  
15  
16  
17  
18  
19  
20  
21  
22  
23  
24  
25  
26  
27  
28  
29  
30  
31  
32  
33  
34  
35  
36  
37  
38  
39  
40  
41  
42  
43  
44  
45  
46

|        |                                                                                                          |       |
|--------|----------------------------------------------------------------------------------------------------------|-------|
| 723464 | SARS-CoV-2 (COVID19) ORF1ab region [Presence] in Unspecified specimen by NAA with probe detection        | LOINC |
| 723471 | SARS-CoV-2 (COVID19) RdRp gene [Cycle Threshold #] in Respiratory specimen by NAA with probe detection   | LOINC |
| 723470 | SARS-CoV-2 (COVID19) RdRp gene [Cycle Threshold #] in Unspecified specimen by NAA with probe detection   | LOINC |
| 706160 | SARS-CoV-2 (COVID19) RdRp gene [Presence] in Respiratory specimen by NAA with probe detection            | LOINC |
| 706173 | SARS-CoV-2 (COVID19) RdRp gene [Presence] in Unspecified specimen by NAA with probe detection            | LOINC |
| 586528 | SARS-CoV-2 (COVID19) RNA [Cycle Threshold #] in Respiratory specimen by NAA with probe detection         | LOINC |
| 586529 | SARS-CoV-2 (COVID19) RNA [Cycle Threshold #] in Unspecified specimen by NAA with probe detection         | LOINC |
| 715262 | SARS-CoV-2 (COVID19) RNA [Log #/volume] (viral load) in Unspecified specimen by NAA with probe detection | LOINC |
| 723476 | SARS-CoV-2 (COVID19) RNA [Presence] in Nasopharynx by NAA with non-probe detection                       | LOINC |
| 586526 | SARS-CoV-2 (COVID19) RNA [Presence] in Nasopharynx by NAA with probe detection                           | LOINC |
| 757677 | SARS-CoV-2 (COVID19) RNA [Presence] in Nose by NAA with probe detection                                  | LOINC |
| 706163 | SARS-CoV-2 (COVID19) RNA [Presence] in Respiratory specimen by NAA with probe detection                  | LOINC |
| 715260 | SARS-CoV-2 (COVID19) RNA [Presence] in Saliva (oral fluid) by NAA with probe detection                   | LOINC |
| 715261 | SARS-CoV-2 (COVID19) RNA [Presence] in Saliva (oral fluid) by Sequencing                                 | LOINC |
| 723463 | SARS-CoV-2 (COVID19) RNA [Presence] in Serum or Plasma by NAA with probe detection                       | LOINC |
| 706170 | SARS-CoV-2 (COVID19) RNA [Presence] in Unspecified specimen by NAA with probe detection                  | LOINC |
| 706158 | SARS-CoV-2 (COVID19) RNA panel - Respiratory specimen by NAA with probe detection                        | LOINC |
| 706169 | SARS-CoV-2 (COVID19) RNA panel - Unspecified specimen by NAA with probe detection                        | LOINC |
| 723467 | SARS-CoV-2 (COVID19) S gene [Cycle Threshold #] in Respiratory specimen by NAA with probe detection      | LOINC |
| 723468 | SARS-CoV-2 (COVID19) S gene [Cycle Threshold #] in Unspecified specimen by NAA with probe detection      | LOINC |

|          |                                                                                            |       |
|----------|--------------------------------------------------------------------------------------------|-------|
| 723465   | SARS-CoV-2 (COVID19) S gene [Presence] in Respiratory specimen by NAA with probe detection | LOINC |
| 586519   | SARS-CoV-2 (COVID19) S gene [Presence] in Serum or Plasma by NAA with probe detection      | LOINC |
| 723466   | SARS-CoV-2 (COVID19) S gene [Presence] in Unspecified specimen by NAA with probe detection | LOINC |
| 586517   | SARS-CoV-2 (COVID19) whole genome [Nucleotide sequence] in Isolate by Sequencing           | LOINC |
| 40218805 | Testing for SARS-CoV-2 in CDC laboratory                                                   | HCPCS |
| 40218804 | Testing for SARS-CoV-2 in non-CDC laboratory                                               | HCPCS |

### Supporting Table 3. Definitions and codes used for hypertension and other comorbidities

| Name                         | Included Codes                                                                                              |
|------------------------------|-------------------------------------------------------------------------------------------------------------|
| Hyperlipidemia               | <a href="https://atlas.ohdsi.org/#/concept/432867">https://atlas.ohdsi.org/#/concept/432867</a>             |
| Chronic kidney disease       | <a href="https://atlas.ohdsi.org/#/cohortdefinition/312">https://atlas.ohdsi.org/#/cohortdefinition/312</a> |
| Cancer                       | <a href="https://atlas.ohdsi.org/#/cohortdefinition/222">https://atlas.ohdsi.org/#/cohortdefinition/222</a> |
| Asthma                       | <a href="https://atlas.ohdsi.org/#/cohortdefinition/218">https://atlas.ohdsi.org/#/cohortdefinition/218</a> |
| Dementia                     | <a href="https://atlas.ohdsi.org/#/cohortdefinition/226">https://atlas.ohdsi.org/#/cohortdefinition/226</a> |
| Total cardiovascular disease | <a href="https://atlas.ohdsi.org/#/cohortdefinition/246">https://atlas.ohdsi.org/#/cohortdefinition/246</a> |
| Peripheral vascular disease  | <a href="https://atlas.ohdsi.org/#/concept/321052">https://atlas.ohdsi.org/#/concept/321052</a>             |



|                                       |                                                                                                             |
|---------------------------------------|-------------------------------------------------------------------------------------------------------------|
| Cerebrovascular disease               | <a href="https://atlas.ohdsi.org/#/concept/381591">https://atlas.ohdsi.org/#/concept/381591</a>             |
| Chronic liver disease                 | <a href="https://atlas.ohdsi.org/#/concept/4212540">https://atlas.ohdsi.org/#/concept/4212540</a>           |
| Chronic obstructive pulmonary disease | <a href="https://atlas.ohdsi.org/#/cohortdefinition/219">https://atlas.ohdsi.org/#/cohortdefinition/219</a> |
| Heart disease                         | <a href="https://atlas.ohdsi.org/#/cohortdefinition/231">https://atlas.ohdsi.org/#/cohortdefinition/231</a> |
| Hypertension                          | <a href="https://atlas.ohdsi.org/#/cohortdefinition/227">https://atlas.ohdsi.org/#/cohortdefinition/227</a> |
| Obesity                               | <a href="https://atlas.ohdsi.org/#/cohortdefinition/224">https://atlas.ohdsi.org/#/cohortdefinition/224</a> |
| Type 2 Diabetes Mellitus              | <a href="https://atlas.ohdsi.org/#/cohortdefinition/311">https://atlas.ohdsi.org/#/cohortdefinition/311</a> |

12  
13  
14

15 **Supporting Table 4. Prevalence of hypertension among COVID-19 patients in the diagnosed and**  
16 **hospitalised cohorts in the CHARYBDIS Network.**

|                     | Diagnosed with COVID-19 |                  | Hospitalized with COVID-19 |                  |
|---------------------|-------------------------|------------------|----------------------------|------------------|
|                     | N of prevalent cases    | % (95% CI)       | N of prevalent cases       | % (95% CI)       |
| IQVIA-OpenClaims-US | 1,245,436               | 48.3 (48.2-48.4) | 384,508                    | 76.5 (76.3-76.6) |
| OPTUM-EHR-US        | 66,432                  | 37.4 (37.2-37.7) | 18,242                     | 64.1 (63.5-64.6) |
| VA-OMOP-US          | 34,093                  | 61.4 (61.0-61.8) | 8,996                      | 85.9 (85.2-86.6) |

|                      |        |                  |       |                  |
|----------------------|--------|------------------|-------|------------------|
| HEALTHVERITY-US      | 25,405 | 22.3 (22.0-22.5) | 4,512 | 59.5 (58.4-60.6) |
| SIDIAP-Spain         | 21,289 | 17.4 (17.2-17.6) | 5,636 | 31.0 (30.3-31.6) |
| CUIMC-US             | 3,672  | 43.1 (42.1-44.2) | 1,708 | 65.7 (63.9-67.5) |
| IQVIA-LPD-France     | 3,260  | 19.0 (18.4-19.6) | -     | -                |
| CU-AMC-HDC-US        | 2,461  | 33.9 (32.8-34.9) | 904   | 63.0 (60.5-65.5) |
| IQVIA-DA-Germany     | 2,418  | 30.3 (29.3-31.3) | -     | -                |
| HIRA-South Korea     | -      | -                | 1943  | 25.6 (24.6-26.6) |
| IQVIA-LPD-Italy      | 1,618  | 36.1 (34.6-37.5) | -     | -                |
| STARR-OMOP-US        | 1,246  | 37.4 (35.8-39.1) | 342   | 55.6 (51.7-59.5) |
| HMAR-Spain           | -      | -                | 594   | 29.5 (27.5-31.5) |
| CPRD-UK              | 756    | 22.4 (21.0-23.8) | -     | -                |
| IPCI-The Netherlands | 676    | 22.2 (20.7-23.7) | -     | -                |

17

18

19

20

# Reporting checklist for cohort study.

Based on the STROBE cohort guidelines.

## Instructions to authors

Complete this checklist by entering the page numbers from your manuscript where readers will find each of the items listed below.

Your article may not currently address all the items on the checklist. Please modify your text to include the missing information. If you are certain that an item does not apply, please write "n/a" and provide a short explanation.

Upload your completed checklist as an extra file when you submit to a journal.

In your methods section, say that you used the STROBE cohort reporting guidelines, and cite them as:

von Elm E, Altman DG, Egger M, Pocock SJ, Gøtzsche PC, Vandenbroucke JP. The Strengthening of Reporting of Observational Studies in Epidemiology (STROBE) Statement: guidelines for reporting observational studies.

|                           |                     | Reporting Item                                                                                  | Page Number |
|---------------------------|---------------------|-------------------------------------------------------------------------------------------------|-------------|
| <b>Title and abstract</b> |                     |                                                                                                 |             |
| Title                     | <a href="#">#1a</a> | Indicate the study's design with a commonly used term in the title or the abstract              | 1           |
| Abstract                  | <a href="#">#1b</a> | Provide in the abstract an informative and balanced summary of what was done and what was found | 4,5         |
| <b>Introduction</b>       |                     |                                                                                                 |             |
| Background / rationale    | <a href="#">#2</a>  | Explain the scientific background and rationale for the investigation being reported            | 6           |
| Objectives                | <a href="#">#3</a>  | State specific objectives, including any prespecified hypotheses                                | 6           |
| <b>Methods</b>            |                     |                                                                                                 |             |
| Study design              | <a href="#">#4</a>  | Present key elements of study design early in the paper                                         | 6           |
| Setting                   | <a href="#">#5</a>  | Describe the setting, locations, and relevant dates, including periods of                       | 6-8         |

recruitment, exposure, follow-up, and data collection

|    |                      |                      |                                                                                                                                                                                                                                                                      |
|----|----------------------|----------------------|----------------------------------------------------------------------------------------------------------------------------------------------------------------------------------------------------------------------------------------------------------------------|
| 1  |                      |                      |                                                                                                                                                                                                                                                                      |
| 2  |                      |                      |                                                                                                                                                                                                                                                                      |
| 3  | Eligibility criteria | <a href="#">#6a</a>  | Give the eligibility criteria, and the sources and methods of selection of participants. Describe methods of follow-up.                                                                                                                                              |
| 4  |                      |                      |                                                                                                                                                                                                                                                                      |
| 5  |                      |                      |                                                                                                                                                                                                                                                                      |
| 6  | Eligibility criteria | <a href="#">#6b</a>  | For matched studies, give matching criteria and number of exposed and unexposed                                                                                                                                                                                      |
| 7  |                      |                      |                                                                                                                                                                                                                                                                      |
| 8  |                      |                      |                                                                                                                                                                                                                                                                      |
| 9  |                      |                      |                                                                                                                                                                                                                                                                      |
| 10 | Variables            | <a href="#">#7</a>   | Clearly define all outcomes, exposures, predictors, potential confounders, and effect modifiers. Give diagnostic criteria, if applicable                                                                                                                             |
| 11 |                      |                      |                                                                                                                                                                                                                                                                      |
| 12 |                      |                      |                                                                                                                                                                                                                                                                      |
| 13 |                      |                      |                                                                                                                                                                                                                                                                      |
| 14 |                      |                      |                                                                                                                                                                                                                                                                      |
| 15 | Data sources /       | <a href="#">#8</a>   | For each variable of interest give sources of data and details of methods of assessment (measurement). Describe comparability of assessment methods if there is more than one group. Give information separately for for exposed and unexposed groups if applicable. |
| 16 | measurement          |                      |                                                                                                                                                                                                                                                                      |
| 17 |                      |                      |                                                                                                                                                                                                                                                                      |
| 18 |                      |                      |                                                                                                                                                                                                                                                                      |
| 19 |                      |                      |                                                                                                                                                                                                                                                                      |
| 20 |                      |                      |                                                                                                                                                                                                                                                                      |
| 21 |                      |                      |                                                                                                                                                                                                                                                                      |
| 22 | Bias                 | <a href="#">#9</a>   | Describe any efforts to address potential sources of bias                                                                                                                                                                                                            |
| 23 |                      |                      |                                                                                                                                                                                                                                                                      |
| 24 | Study size           | <a href="#">#10</a>  | Explain how the study size was arrived at                                                                                                                                                                                                                            |
| 25 |                      |                      |                                                                                                                                                                                                                                                                      |
| 26 |                      |                      |                                                                                                                                                                                                                                                                      |
| 27 | Quantitative         | <a href="#">#11</a>  | Explain how quantitative variables were handled in the analyses. If applicable, describe which groupings were chosen, and why                                                                                                                                        |
| 28 | variables            |                      |                                                                                                                                                                                                                                                                      |
| 29 |                      |                      |                                                                                                                                                                                                                                                                      |
| 30 |                      |                      |                                                                                                                                                                                                                                                                      |
| 31 | Statistical          | <a href="#">#12a</a> | Describe all statistical methods, including those used to control for confounding                                                                                                                                                                                    |
| 32 | methods              |                      |                                                                                                                                                                                                                                                                      |
| 33 |                      |                      |                                                                                                                                                                                                                                                                      |
| 34 |                      |                      |                                                                                                                                                                                                                                                                      |
| 35 | 9-10                 |                      |                                                                                                                                                                                                                                                                      |
| 36 |                      |                      |                                                                                                                                                                                                                                                                      |
| 37 | Statistical          | <a href="#">#12b</a> | Describe any methods used to examine subgroups and interactions                                                                                                                                                                                                      |
| 38 | methods              |                      |                                                                                                                                                                                                                                                                      |
| 39 |                      |                      |                                                                                                                                                                                                                                                                      |
| 40 |                      |                      |                                                                                                                                                                                                                                                                      |
| 41 | Statistical          | <a href="#">#12c</a> | Explain how missing data were addressed                                                                                                                                                                                                                              |
| 42 | methods              |                      |                                                                                                                                                                                                                                                                      |
| 43 |                      |                      |                                                                                                                                                                                                                                                                      |
| 44 | Statistical          | <a href="#">#12d</a> | If applicable, explain how loss to follow-up was addressed                                                                                                                                                                                                           |
| 45 | methods              |                      |                                                                                                                                                                                                                                                                      |
| 46 |                      |                      |                                                                                                                                                                                                                                                                      |
| 47 |                      |                      |                                                                                                                                                                                                                                                                      |
| 48 | Statistical          | <a href="#">#12e</a> | Describe any sensitivity analyses                                                                                                                                                                                                                                    |
| 49 | methods              |                      |                                                                                                                                                                                                                                                                      |
| 50 |                      |                      |                                                                                                                                                                                                                                                                      |
| 51 |                      |                      |                                                                                                                                                                                                                                                                      |
| 52 | n/a                  |                      |                                                                                                                                                                                                                                                                      |
| 53 |                      |                      |                                                                                                                                                                                                                                                                      |
| 54 | <b>Results</b>       |                      |                                                                                                                                                                                                                                                                      |
| 55 |                      |                      |                                                                                                                                                                                                                                                                      |
| 56 |                      |                      |                                                                                                                                                                                                                                                                      |
| 57 | Participants         | <a href="#">#13a</a> | Report numbers of individuals at each stage of study—eg numbers potentially eligible, examined for eligibility, confirmed eligible,                                                                                                                                  |
| 58 |                      |                      |                                                                                                                                                                                                                                                                      |
| 59 |                      |                      |                                                                                                                                                                                                                                                                      |
| 60 |                      |                      |                                                                                                                                                                                                                                                                      |

included in the study, completing follow-up, and analysed. Give information separately for for exposed and unexposed groups if applicable.

|    |                   |                      |                                                                                                                                                                                                                               |
|----|-------------------|----------------------|-------------------------------------------------------------------------------------------------------------------------------------------------------------------------------------------------------------------------------|
| 1  |                   |                      |                                                                                                                                                                                                                               |
| 2  |                   |                      |                                                                                                                                                                                                                               |
| 3  |                   |                      |                                                                                                                                                                                                                               |
| 4  |                   |                      |                                                                                                                                                                                                                               |
| 5  | Participants      | <a href="#">#13b</a> | Give reasons for non-participation at each stage 10                                                                                                                                                                           |
| 6  |                   |                      |                                                                                                                                                                                                                               |
| 7  | Participants      | <a href="#">#13c</a> | Consider use of a flow diagram                                                                                                                                                                                                |
| 8  |                   |                      |                                                                                                                                                                                                                               |
| 9  |                   |                      |                                                                                                                                                                                                                               |
| 10 | Supporting figure |                      |                                                                                                                                                                                                                               |
| 11 | 1                 |                      |                                                                                                                                                                                                                               |
| 12 |                   |                      |                                                                                                                                                                                                                               |
| 13 |                   |                      |                                                                                                                                                                                                                               |
| 14 | Descriptive data  | <a href="#">#14a</a> | Give characteristics of study participants (eg demographic, clinical, 10,11<br>social) and information on exposures and potential confounders. Give<br>information separately for exposed and unexposed groups if applicable. |
| 15 |                   |                      |                                                                                                                                                                                                                               |
| 16 |                   |                      |                                                                                                                                                                                                                               |
| 17 |                   |                      |                                                                                                                                                                                                                               |
| 18 |                   |                      |                                                                                                                                                                                                                               |
| 19 | Descriptive data  | <a href="#">#14b</a> | Indicate number of participants with missing data for each variable of<br>interest                                                                                                                                            |
| 20 |                   |                      |                                                                                                                                                                                                                               |
| 21 |                   |                      |                                                                                                                                                                                                                               |
| 22 |                   |                      |                                                                                                                                                                                                                               |
| 23 | n/a               |                      |                                                                                                                                                                                                                               |
| 24 |                   |                      |                                                                                                                                                                                                                               |
| 25 | Descriptive data  | <a href="#">#14c</a> | Summarise follow-up time (eg, average and total amount)                                                                                                                                                                       |
| 26 |                   |                      |                                                                                                                                                                                                                               |
| 27 | 10                |                      |                                                                                                                                                                                                                               |
| 28 |                   |                      |                                                                                                                                                                                                                               |
| 29 |                   |                      |                                                                                                                                                                                                                               |
| 30 | Outcome data      | <a href="#">#15</a>  | Report numbers of outcome events or summary measures over time.<br>Give information separately for exposed and unexposed groups if<br>applicable.                                                                             |
| 31 |                   |                      |                                                                                                                                                                                                                               |
| 32 |                   |                      |                                                                                                                                                                                                                               |
| 33 |                   |                      |                                                                                                                                                                                                                               |
| 34 |                   |                      |                                                                                                                                                                                                                               |
| 35 | 11-16             |                      |                                                                                                                                                                                                                               |
| 36 |                   |                      |                                                                                                                                                                                                                               |
| 37 |                   |                      |                                                                                                                                                                                                                               |
| 38 | Main results      | <a href="#">#16a</a> | Give unadjusted estimates and, if applicable, confounder-adjusted<br>estimates and their precision (eg, 95% confidence interval). Make clear<br>which confounders were adjusted for and why they were included n/a            |
| 39 |                   |                      |                                                                                                                                                                                                                               |
| 40 |                   |                      |                                                                                                                                                                                                                               |
| 41 |                   |                      |                                                                                                                                                                                                                               |
| 42 |                   |                      |                                                                                                                                                                                                                               |
| 43 | Main results      | <a href="#">#16b</a> | Report category boundaries when continuous variables were<br>categorized Figures<br>1-4                                                                                                                                       |
| 44 |                   |                      |                                                                                                                                                                                                                               |
| 45 |                   |                      |                                                                                                                                                                                                                               |
| 46 |                   |                      |                                                                                                                                                                                                                               |
| 47 | Main results      | <a href="#">#16c</a> | If relevant, consider translating estimates of relative risk into absolute<br>risk for a meaningful time period                                                                                                               |
| 48 |                   |                      |                                                                                                                                                                                                                               |
| 49 |                   |                      |                                                                                                                                                                                                                               |
| 50 |                   |                      |                                                                                                                                                                                                                               |
| 51 | n/a               |                      |                                                                                                                                                                                                                               |
| 52 |                   |                      |                                                                                                                                                                                                                               |
| 53 | Other analyses    | <a href="#">#17</a>  | Report other analyses done—eg analyses of subgroups and interactions,<br>and sensitivity analyses n/a                                                                                                                         |
| 54 |                   |                      |                                                                                                                                                                                                                               |
| 55 |                   |                      |                                                                                                                                                                                                                               |
| 56 |                   |                      |                                                                                                                                                                                                                               |
| 57 | <b>Discussion</b> |                      |                                                                                                                                                                                                                               |
| 58 |                   |                      |                                                                                                                                                                                                                               |
| 59 |                   |                      |                                                                                                                                                                                                                               |
| 60 |                   |                      |                                                                                                                                                                                                                               |

|    |                    |                     |                                                                          |       |
|----|--------------------|---------------------|--------------------------------------------------------------------------|-------|
| 1  | Key results        | <a href="#">#18</a> | Summarise key results with reference to study objectives                 | 17    |
| 2  |                    |                     |                                                                          |       |
| 3  | Limitations        | <a href="#">#19</a> | Discuss limitations of the study, taking into account sources of         | 19    |
| 4  |                    |                     | potential bias or imprecision. Discuss both direction and magnitude of   |       |
| 5  |                    |                     | any potential bias.                                                      |       |
| 6  |                    |                     |                                                                          |       |
| 7  |                    |                     |                                                                          |       |
| 8  | Interpretation     | <a href="#">#20</a> | Give a cautious overall interpretation considering objectives,           | 17-19 |
| 9  |                    |                     | limitations, multiplicity of analyses, results from similar studies, and |       |
| 10 |                    |                     | other relevant evidence.                                                 |       |
| 11 |                    |                     |                                                                          |       |
| 12 |                    |                     |                                                                          |       |
| 13 | Generalisability   | <a href="#">#21</a> | Discuss the generalisability (external validity) of the study results    | 18-19 |
| 14 |                    |                     |                                                                          |       |
| 15 |                    |                     |                                                                          |       |
| 16 | <b>Other</b>       |                     |                                                                          |       |
| 17 | <b>Information</b> |                     |                                                                          |       |
| 18 |                    |                     |                                                                          |       |
| 19 |                    |                     |                                                                          |       |
| 20 | Funding            | <a href="#">#22</a> | Give the source of funding and the role of the funders for the present   | 22,23 |
| 21 |                    |                     | study and, if applicable, for the original study on which the present    |       |
| 22 |                    |                     | article is based                                                         |       |
| 23 |                    |                     |                                                                          |       |
| 24 |                    |                     |                                                                          |       |
| 25 |                    |                     |                                                                          |       |
| 26 |                    |                     |                                                                          |       |

## Notes:

- 29 • 13c: Supporting figure 1
- 30
- 31 • 16b: Figures 1-4 The STROBE checklist is distributed under the terms of the Creative Commons
- 32 Attribution License CC-BY. This checklist was completed on 20. September 2021 using
- 33 <https://www.goodreports.org/>, a tool made by the [EQUATOR Network](#) in collaboration with [Penelope.ai](#)
- 34
- 35
- 36
- 37
- 38
- 39
- 40
- 41
- 42
- 43
- 44
- 45
- 46
- 47
- 48
- 49
- 50
- 51
- 52
- 53
- 54
- 55
- 56
- 57
- 58
- 59
- 60
